# Supplementary material
Source: PubMed Central journal article supplement (PMC2749982)

## **SUPPORTING INFORMATION**

### **Total Synthesis of (+)-Sorangicin A**

Amos B. Smith, III,\* Shuzhi Dong, Jehrod B. Brenneman, and Richard J. Fox

*Department of Chemistry, Laboratory for Research on the Structure of Matter, and Monell Chemical Senses Center,  
University of Pennsylvania, Philadelphia, Pennsylvania 19104, U.S.A.*

Experimental procedures and high field  $^1\text{H}$  NMR and  $^{13}\text{C}$  NMR spectra for all compounds.

pp S1-S62

## Experimental Section

**Materials and Methods:** All solvents were reagent grade. Anhydrous dichloromethane ( $\text{CH}_2\text{Cl}_2$ ), diethyl ether ( $\text{Et}_2\text{O}$ ) and tetrahydrofuran (THF) were obtained from the Pure Solve<sup>TM</sup> PS-400 under an argon atmosphere. All reagents were purchased from Aldrich or Acros and used as received. Reactions were magnetically stirred under an argon atmosphere and monitored by thin layer chromatography (TLC) with 0.25 mm E. Merck pre-coated silica gel plates. Flash chromatography was performed with silica gel 60 (particle size 0.040 – 0.062 mm) supplied by Silicycle and Sorbent Technologies. Yields refer to chromatographically and spectroscopically pure compounds, unless otherwise stated. Infrared spectra were recorded on a Jasco Model FT/IR-480 Plus spectrometer. Proton and carbon-13 NMR spectra were recorded on a Bruker AMX-500 spectrometer or a Bruker Avance III 500 spectrometer equipped with a 5 mm DCH CryoProbe at University of Pennsylvania. Chemical shifts are reported relative to either chloroform ( $\delta$  7.26) or benzene ( $\delta$  7.16) for  $^1\text{H}$  NMR and either chloroform ( $\delta$  77.2) or benzene ( $\delta$  128.4) for  $^{13}\text{C}$  NMR. Optical rotations were measured on a Perkin-Elmer model 241 polarimeter. High resolution mass spectra were measured at the University of Pennsylvania Mass Spectrometry Service Center on either a VG Micromass 70/70H or VG ZAB-E spectrometer.

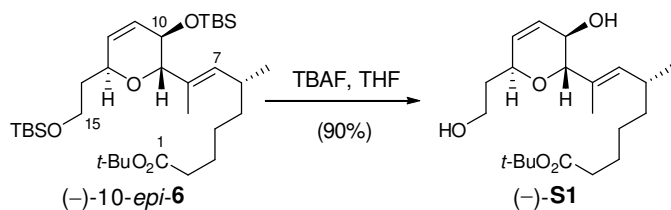

**Diol (–)-S1.** To a solution of (–)-10-*epi*-6 (72 mg, 0.12 mmol) in THF (3.4 mL) was added tetrabutylammonium fluoride (TBAF, 1 M in THF, 0.36 mL, 0.36 mmol). After being stirred overnight, the reaction mixture was diluted with water (5 mL) and EtOAc (5 mL). The aqueous phase was then washed with EtOAc (3x5 mL), and the combined organic layers were washed with brine (5 mL), dried over  $\text{Na}_2\text{SO}_4$  and concentrated *in vacuo*. Purification by flash chromatography (20% to 70%, EtOAc/hexanes) afforded diol (–)-**S1** (40 mg, 90%) as a pale yellow oil:  $[\alpha]_{\text{D}}^{29} -39.4$  (*c* 1.06,  $\text{CHCl}_3$ ); IR (neat,  $\text{cm}^{-1}$ ) 3426 (br), 1728, 1454, 1391, 1367, 1156, 1061;  $^1\text{H}$  NMR (500 MHz,  $\text{CDCl}_3$ )  $\delta$  5.91 (ddd,  $J = 10.3, 2.3, 2.3$  Hz, 1H), 5.72, (ddd,  $J = 10.3, 2.3, 2.3$  Hz, 1H), 5.23 (d,  $J = 9.6$  Hz, 1H), 4.34-4.31 (m, 1H), 4.12-4.11 (m, 1H), 3.84-3.76 (m, 3H), 2.56 (br s, 1H), 2.45-2.39 (m, 1H), 2.21-2.13 (m, 3H), 1.98 (dddd,  $J = 14.6, 10.2, 7.9, 4.3$  Hz, 1H), 1.67 (s, 3H), 1.56-1.48 (m, 2H), 1.43 (s, 9H), 1.36-1.16 (m, 4H),

0.94 (d,  $J = 6.6$  Hz, 3H);  $^{13}\text{C}$  NMR (125 MHz,  $\text{CDCl}_3$ )  $\delta$  173.6, 137.6, 130.8, 130.2, 128.5, 80.3, 79.9, 72.6, 63.6, 61.8, 37.1, 35.6, 34.9, 32.2, 28.3 (3C), 27.2, 25.0, 21.0, 12.4; HRMS (ES)  $m/z$  ( $\text{M}+\text{Na}$ ) $^+$  calcd for  $\text{C}_{21}\text{H}_{36}\text{O}_5\text{Na}^+$  391.2460, obsd 391.2460.

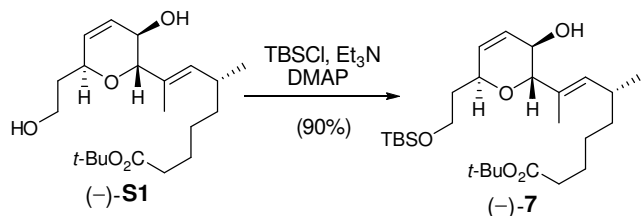

**Allylic alcohol (-)-7.** To a solution of diol (-)-S1 (40 mg, 0.109 mmol) in  $\text{CH}_2\text{Cl}_2$  (1.2 mL) was added DMAP (1.8 mg, 0.015 mmol) and  $\text{Et}_3\text{N}$  (25  $\mu\text{L}$ , 0.18 mmol) followed by the addition of TBSCl (26.5 mg, 0.18 mmol) in  $\text{CH}_2\text{Cl}_2$  (1.2 mL). After 22 h the reaction mixture was quenched with saturated  $\text{NH}_4\text{Cl}$  solution (6 mL), and extracted with  $\text{Et}_2\text{O}$  (3 $\times$ 10 mL). The combined organic layers were dried over  $\text{Na}_2\text{SO}_4$ , and concentrated *in vacuo*. The crude residue was purified by flash chromatography (2% to 30%  $\text{EtOAc}$ /hexanes) to afford allylic alcohol (-)-7 (47 mg, 90%) as a pale yellow oil, along with (-)-10-*epi*-6 (4 mg, 6%).  $[\alpha]_{\text{D}}^{23}$   $-38.8$  ( $c$  0.74,  $\text{CHCl}_3$ ); IR (neat,  $\text{cm}^{-1}$ ) 3440 (br), 1730, 1461, 1367, 1253, 1099, 837;  $^1\text{H}$  NMR (500 MHz,  $\text{CDCl}_3$ )  $\delta$  5.87 (ddd,  $J = 10.3, 2.1, 2.1$  Hz, 1H), 5.77 (ddd,  $J = 10.3, 2.1, 2.1$  Hz, 1H), 5.19 (d,  $J = 9.5$  Hz, 1H), 4.30-4.27 (m, 1H), 4.09 (br s, 1H), 3.78-3.70 (m, 2H), 3.69 (d,  $J = 7.1$  Hz, 1H), 2.46-2.40 (m, 1H), 2.18 (dt,  $J = 7.4, 2.5$  Hz, 2H), 2.01 (br d,  $J = 4.3$  Hz, 1H), 1.89-1.82 (m, 1H), 1.75-1.68 (m, 1H), 1.67 (d,  $J = 1.0$  Hz, 3H), 1.57-1.50 (m, 2H), 1.43 (s, 9H), 1.36-1.18 (m, 4H), 0.95 (d,  $J = 6.7$  Hz, 3H), 0.88 (s, 9H), 0.05 (s, 6H);  $^{13}\text{C}$  NMR (125 MHz,  $\text{CDCl}_3$ )  $\delta$  173.5, 136.5, 131.6, 131.0, 128.0, 80.2, 79.6, 69.4, 64.0, 60.2, 37.2, 36.3, 35.6, 32.1, 28.3 (3C), 27.2, 26.1 (3C), 25.1, 21.0, 18.5, 12.3, -5.2 (2C); HRMS (ES)  $m/z$  ( $\text{M}+\text{Na}$ ) $^+$  calcd for  $\text{C}_{27}\text{H}_{50}\text{O}_5\text{SiNa}^+$  505.3325, obsd 505.3307.

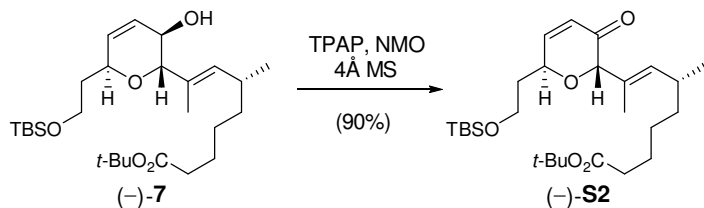

**Enone (-)-S2.** A stirred solution of allylic alcohol (-)-7 (52 mg, 0.108 mmol) and *N*-methylmorpholine *N*-oxide monohydrate (19 mg, 0.16 mmol) in  $\text{CH}_2\text{Cl}_2$  (2 mL) was treated with 4 Å molecular sieves (54 mg). After 5 min, TPAP (3.8 mg, 0.011 mmol) was added, and the reaction mixture was stirred for a further 1 h before being passed through a pad of silica gel which was rinsed

with ethyl acetate (20 mL). The solvent was evaporated under reduced pressure to yield enone (–)-**S2** (47 mg, 90%) as a yellow oil.  $[\alpha]_{\text{D}}^{29} -43.9$  (*c* 0.54, C<sub>6</sub>H<sub>6</sub>); IR (neat, cm<sup>-1</sup>) 1730, 1693, 1462, 1254, 1155, 1093, 838; <sup>1</sup>H NMR (500 MHz, CDCl<sub>3</sub>)  $\delta$  6.93 (dd, *J* = 10.3, 2.0 Hz, 1H), 6.04 (dd, *J* = 10.3, 2.4 Hz, 1H), 4.93 (d, *J* = 9.4 Hz, 1H), 4.44 (s, 1H), 4.39 (ddd, *J* = 6.5, 2.0, 2.0 Hz, 1H), 3.81-3.72 (m, 2H), 2.41-2.34 (m, 1H), 2.14 (t, *J* = 7.5 Hz, 2H), 1.86 (dd, *J* = 12.1, 6.2 Hz, 2H), 1.70 (d, *J* = 0.7 Hz, 3H), 1.54-1.48 (m, 2H), 1.42 (s, 9H), 1.29-1.11 (m, 4H), 0.88 (d, *J* = 6.6 Hz, 3H), 0.87 (s, 9H), 0.04 (s, 6H); <sup>13</sup>C NMR (125 MHz, CDCl<sub>3</sub>)  $\delta$  196.1, 173.2, 151.9, 136.4, 128.1, 126.3, 82.6, 80.1, 66.3, 58.9, 37.04, 37.00, 35.6, 32.6, 28.2 (3C), 27.2, 26.0 (3C), 25.3, 20.5, 18.4, 14.4, -5.3 (2C); HRMS (ES) *m/z* (M+Na)<sup>+</sup> calcd for C<sub>27</sub>H<sub>48</sub>O<sub>5</sub>SiNa<sup>+</sup> 503.3169, obsd 503.3175.

**Allylic Alcohol (+)-8.** To a solution of enone (–)-**S2** (36 mg, 0.075 mmol) in MeOH (3 mL) was added  $\text{CeCl}_3 \cdot 7\text{H}_2\text{O}$  (279 mg, 0.75 mmol) at rt. After 5 min,  $\text{NaBH}_4$  (5.7 mg, 0.15 mmol) was added at 0 °C. After 15 min, the reaction mixture was quenched with saturated  $\text{NH}_4\text{Cl}$  solution (15 mL), and extracted with EtOAc (3×10 mL). The combined organic layers were washed with brine, dried over  $\text{Na}_2\text{SO}_4$ , and evaporated to leave a crude residue, which was purified by flash chromatography (5% to 30% EtOAc/hexanes) to afford allylic alcohol (+)-**8** (34.2 mg, 95%) as a pale yellow oil.  $[\alpha]_{\text{D}}^{30} +85.2$  (c 0.54,  $\text{CHCl}_3$ ); IR (neat,  $\text{cm}^{-1}$ ) 3448, 1731, 1461, 1254, 1155, 1095, 837;  $^1\text{H}$  NMR (500 MHz,  $\text{CDCl}_3$ )  $\delta$  6.05 (ddd,  $J = 10.1, 5.6, 2.0$  Hz, 1H), 5.91 (dd,  $J = 10.1, 3.2$  Hz, 1H), 5.43 (d,  $J = 9.6$  Hz, 1H), 4.53–4.50 (m, 1H), 4.01 (s, 1H), 3.87 (t,  $J = 5.4$  Hz, 1H), 3.78–3.73 (m, 1H), 3.71–3.67 (m, 1H), 2.48–2.41 (m, 1H), 2.19 (dt,  $J = 7.5, 1.5$  Hz, 2H), 1.87–1.80 (m, 1H), 1.72 (d,  $J = 7.4$  Hz, 1H), 1.65 (d,  $J = 0.5$  Hz, 3H), 1.68–1.53 (m, 3H), 1.44 (s, 9H), 1.36–1.25 (m, 4H), 0.95 (d,  $J = 6.6$  Hz, 3H), 0.89 (s, 9H), 0.06 (s, 6H);  $^{13}\text{C}$  NMR (125 MHz,  $\text{CDCl}_3$ )  $\delta$  173.4, 133.7, 132.8, 129.9, 126.3, 80.0, 73.7, 70.3, 62.5, 59.8, 37.4, 35.8, 34.4, 31.9, 28.3 (3C), 27.2, 26.1 (3C), 25.4, 21.4, 18.5, 14.2, –5.2 (2C); HRMS (ES)  $m/z$  ( $\text{M}+\text{Na}$ ) $^+$  calcd for  $\text{C}_{27}\text{H}_{50}\text{O}_5\text{SiNa}^+$  505.3325, obsd 505.3327.

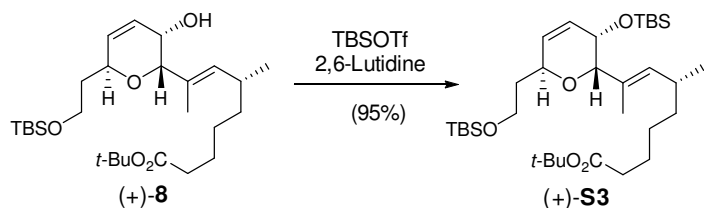

**Bis-TBS Ether (+)-S3.** A stirred solution of (+)-**8** (45 mg, 0.093 mmol) in anhydrous  $\text{CH}_2\text{Cl}_2$  (2.2 mL) was cooled to  $-78^\circ\text{C}$  and treated with 2,6-lutidine (43  $\mu\text{L}$ , 0.373 mmol) and TBS triflate (43  $\mu\text{L}$ , 0.187 mmol). After 1 h, the reaction mixture was quenched with saturated  $\text{NH}_4\text{Cl}$  solution (10 mL) and extracted with  $\text{Et}_2\text{O}$  (3x10 mL). The combined organic extracts were washed with brine (10 mL), dried, and concentrated *in vacuo* to yield the crude product, which was purified by flash chromatography (2-10%  $\text{EtOAc}$ /hexanes) to yield (+)-**S3** (53 mg, 95%) as a pale yellow oil.  $[\alpha]_{\text{D}}^{29} +59.0$  ( $c$  0.60,  $\text{CHCl}_3$ ); IR (neat,  $\text{cm}^{-1}$ ) 1733, 1463, 1365, 1253, 1100, 836;  $^1\text{H}$  NMR (500 MHz,  $\text{CDCl}_3$ )  $\delta$  5.85 (ddd,  $J = 10.2, 4.6, 2.0$  Hz, 1H), 5.78 (dd,  $J = 10.2, 1.7$  Hz, 1H), 5.34 (d,  $J = 9.4$  Hz, 1H), 4.38-4.36 (m, 1H), 4.09 (t,  $J = 3.7$  Hz, 1H), 3.96 (s, 1H), 3.76-3.66 (m, 2H), 2.41-2.35 (m, 1H), 2.18 (t,  $J = 7.6$  Hz, 2H), 1.83-1.76 (m, 1H), 1.65 (d,  $J = 0.8$  Hz, 3H), 1.66-1.52 (m, 3H), 1.44 (s, 9H), 1.31-1.22 (m, 4H), 0.93 (d,  $J = 6.6$  Hz, 3H), 0.88 (s, 9H), 0.86 (s, 9H), 0.05 (s, 6H), 0.04 (s, 3H), 0.03 (s, 3H);  $^{13}\text{C}$  NMR (125 MHz,  $\text{CDCl}_3$ )  $\delta$  173.4, 132.9, 132.4, 130.3, 127.2, 80.0, 76.1, 69.3, 65.4, 60.1, 37.4, 35.8, 35.4, 32.0, 28.3 (3C), 27.2, 26.11 (3C), 26.08 (3C), 25.5, 21.0, 18.5, 18.4, 14.3, -3.9, -4.3, -5.19, -5.24; HRMS (ES)  $m/z$  ( $\text{M}+\text{Na}$ ) $^+$  calcd for  $\text{C}_{33}\text{H}_{64}\text{O}_5\text{Si}_2\text{Na}^+$  619.4190, obsd 619.4211.

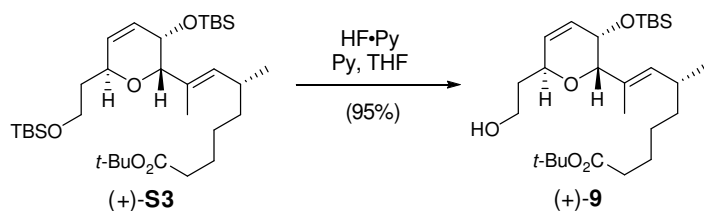

**Alcohol (+)-9.** To a solution of bis-TBS ether (+)-**S3** (53 mg, 0.089 mmol) and THF (3.6 mL) in a nalgene container was added a stock solution of  $\text{HF}\cdot\text{pyridine}$  (0.54 mL). The stock solution was prepared by adding pyridine (3.1 mL) portion wise to a solution of  $\text{HF}\cdot\text{pyridine}$  (1.3 g) and THF (10 mL) in a nalgene container. After 18 h, additional  $\text{HF}\cdot\text{pyridine}$  stock solution (0.2 mL) was added. After being stirred for an additional 8 h, the reaction was carefully diluted with saturated  $\text{NaHCO}_3$  solution (10 mL) and diethyl ether (25 mL). The aqueous layer was then washed with diethyl ether (3x5 mL), and the combined organic layers were washed with saturated  $\text{NH}_4\text{Cl}$  solution (10 mL), saturated  $\text{NaHCO}_3$  solution (10 mL), dried over  $\text{Na}_2\text{SO}_4$  and concentrated *in vacuo*. Purification by flash chromatography

(5% to 30% EtOAc/hexanes) afforded alcohol (+)-**9** (41 mg, 95%) as a pale yellow oil.  $[\alpha]_D^{29} +84.6$  ( $c$  0.36,  $\text{CHCl}_3$ ); IR (neat,  $\text{cm}^{-1}$ ) 3450, 1730, 1460, 1366, 1252, 1114, 838;  $^1\text{H}$  NMR (500 MHz,  $\text{CDCl}_3$ )  $\delta$  5.90 (ddd,  $J = 10.2, 4.8, 2.2$  Hz, 1H), 5.73 (dd,  $J = 10.2, 2.4$  Hz, 1H), 5.36 (d,  $J = 9.5$  Hz, 1H), 4.46 (dd,  $J = 10.6, 2.5$  Hz, 1H), 4.14-4.12 (m, 1H), 4.05 (s, 1H), 3.86-3.81 (m, 1H), 3.78-3.73 (m, 1H), 2.85 (dd,  $J = 8.3, 1.9$  Hz, 1H), 2.41-2.36 (m, 1H), 2.18 (t,  $J = 7.6$  Hz, 2H), 1.99-1.91 (m, 1H), 1.65 (d,  $J = 0.9$  Hz, 3H), 1.61-1.51 (m, 3H), 1.43 (s, 9H), 1.32-1.21 (m, 4H), 0.93 (d,  $J = 6.7$  Hz, 3H), 0.85 (s, 9H), 0.05 (s, 3H), 0.03 (s, 3H);  $^{13}\text{C}$  NMR (125 MHz,  $\text{CDCl}_3$ )  $\delta$  173.5, 133.3, 131.2, 129.6, 127.7, 80.0, 75.9, 73.5, 64.6, 62.1, 37.4, 35.8, 33.6, 32.0, 28.3 (3C), 27.1, 26.0 (3C), 25.4, 21.0, 18.3, 14.4, -3.9, -4.4; HRMS (ES)  $m/z$  ( $\text{M}+\text{Na}$ ) $^+$  calcd for  $\text{C}_{27}\text{H}_{50}\text{O}_5\text{SiNa}^+$  505.3325, obsd 505.3310.

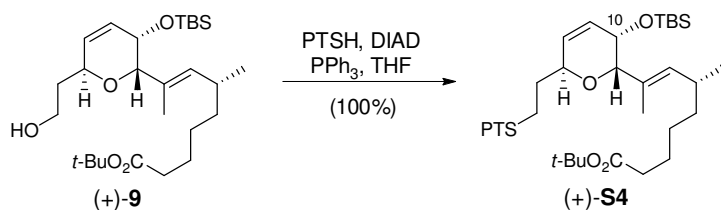

**PTS Ether (+)-S4.** To a solution of alcohol (+)-**9** (20 mg, 0.041 mmol), triphenylphosphine (22 mg, 0.083 mmol) and 1-phenyl-1H-tetrazole-5-thiol (30 mg, 0.166 mmol) in THF (0.83 mL) was added diisopropylazodicarboxylate (DIAD, 33  $\mu\text{L}$ , 0.166 mmol). After being stirred overnight, the reaction mixture was concentrated *in vacuo* and purified by flash chromatography (2% to 15% EtOAc/hexanes) to furnish (+)-**S4** (26.6 mg, 100%) as a pale yellow oil.  $[\alpha]_D^{28} +62.2$  ( $c$  0.86,  $\text{CHCl}_3$ ); IR (neat,  $\text{cm}^{-1}$ ) 1728, 1597, 1499, 1388, 1366, 1250, 1154, 1110, 838;  $^1\text{H}$  NMR (500 MHz,  $\text{CDCl}_3$ )  $\delta$  7.58-7.51 (m, 5H), 5.89 (ddd,  $J = 10.2, 4.6, 2.2$  Hz, 1H), 5.73 (dd,  $J = 10.2, 2.8$  Hz, 1H), 5.35 (d,  $J = 9.4$  Hz, 1H), 4.38-4.36 (m, 1H), 4.12 (t,  $J = 3.6$  Hz, 1H), 4.01 (s, 1H), 3.53 (ddd,  $v$  13.4, 7.8, 4.9 Hz, 1H), 3.40 (ddd,  $J = 13.4, 7.7, 7.7$  Hz, 1H), 2.40-2.34 (m, 1H), 2.15 (t,  $J = 7.6$  Hz, 2H), 2.12-2.01 (m, 2H), 1.66 (s, 3H), 1.55-1.50 (m, 2H), 1.42 (s, 9H), 1.31-1.20 (m, 4H), 0.91 (d,  $J = 6.7$  Hz, 3H), 0.85 (s, 9H), 0.04 (s, 3H), 0.03 (s, 3H);  $^{13}\text{C}$  NMR (125 MHz,  $\text{CDCl}_3$ )  $\delta$  173.4, 154.5, 133.9, 133.4, 130.6, 130.2, 129.9 (2C), 129.7, 128.4, 124.0 (2C), 80.0, 76.3, 70.7, 65.3, 37.3, 35.7, 32.0, 31.8, 30.0, 28.3 (3C), 27.1, 26.0 (3C), 25.4, 20.9, 18.3, 14.4, -4.0, -4.4; HRMS (ES)  $m/z$  ( $\text{M}+\text{H}$ ) $^+$  calcd for  $\text{C}_{34}\text{H}_{55}\text{N}_4\text{O}_4\text{SiS}^+$  643.3713, obsd 643.3740.

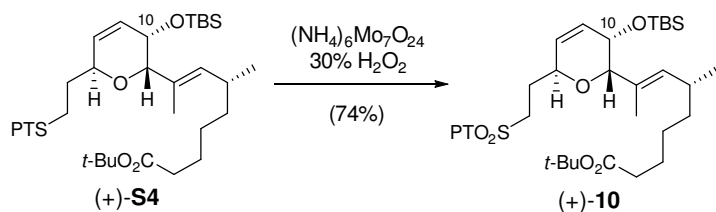

**Sulfone (+)-10.** To a 0 °C solution of PTS-ether (+)-**S4** (26 mg, 0.040 mmol) in absolute EtOH (4 mL) was added a pre-mixed solution of  $(\text{NH}_4)_6\text{Mo}_7\text{O}_{24} \cdot 4\text{H}_2\text{O}$  (12.5 mg, 0.01 mmol) in  $\text{H}_2\text{O}_2$  (30% aq., 0.06 mL, 0.60 mmol) via a glass pipette. The resulting yellow solution was then removed from the ice bath and allowed to warm to room temperature. After 18 h, the reaction mixture was diluted with diethyl ether (10 mL), saturated  $\text{NaHCO}_3$  solution (5 mL) and water (10 mL). The aqueous layer was then extracted with diethyl ether (3x5 mL), and the combined organic layers were dried over  $\text{Na}_2\text{SO}_4$  and concentrated *in vacuo*. Purification by flash chromatography (2% to 15% EtOAc/hexanes) furnished sulfone (+)-**10** (20 mg, 74%) as a pale yellow oil.  $[\alpha]_{\text{D}}^{28} +78.5$  (*c* 1.2,  $\text{CHCl}_3$ ); IR (neat,  $\text{cm}^{-1}$ ) 1728, 1460, 1342, 1154, 1111, 838;  $^1\text{H}$  NMR (500 MHz,  $\text{CDCl}_3$ )  $\delta$  7.70-7.68 (m, 2H), 7.62-7.59 (m, 3H), 5.94 (ddd,  $J = 10.2, 4.3, 2.1$  Hz, 1H), 5.70 (dd,  $J = 10.2, 1.8$  Hz, 1H), 5.39 (d,  $J = 9.5$  Hz, 1H), 4.32-4.30 (m, 1H), 4.17 (t,  $J = 3.8$  Hz, 1H), 4.04 (d,  $J = 2.9$  Hz, 1H), 3.91 (ddd,  $J = 15.1, 11.1, 4.5$  Hz, 1H), 3.79 (ddd,  $J = 15.1, 11.0, 5.1$  Hz, 1H), 2.42-2.36 (m, 1H), 2.28-2.20 (m, 1H), 2.17-2.08 (m, 3H), 1.68 (d,  $J = 0.8$  Hz, 3H), 1.56-1.50 (m, 2H), 1.43 (s, 9H), 1.32-1.22 (m, 4H), 0.93 (d,  $J = 6.6$  Hz, 3H), 0.86 (s, 9H), 0.06 (s, 3H), 0.03 (s, 3H);  $^{13}\text{C}$  NMR (125 MHz,  $\text{CDCl}_3$ )  $\delta$  173.4, 153.5, 134.3, 133.2, 131.6, 130.0 (2C), 129.8, 129.2, 129.0, 125.2 (2C), 80.0, 76.7, 69.7, 65.2, 53.4, 37.3, 35.7, 32.1, 28.3 (3C), 27.2, 26.0 (3C), 25.7, 25.4, 20.9, 18.3, 14.4, -4.1, -4.4; HRMS (ES)  $m/z$  ( $\text{M}+\text{Na}$ ) $^+$  calcd for  $\text{C}_{34}\text{H}_{54}\text{N}_4\text{O}_6\text{SiNa}^+$  697.3431, obsd 697.3405.

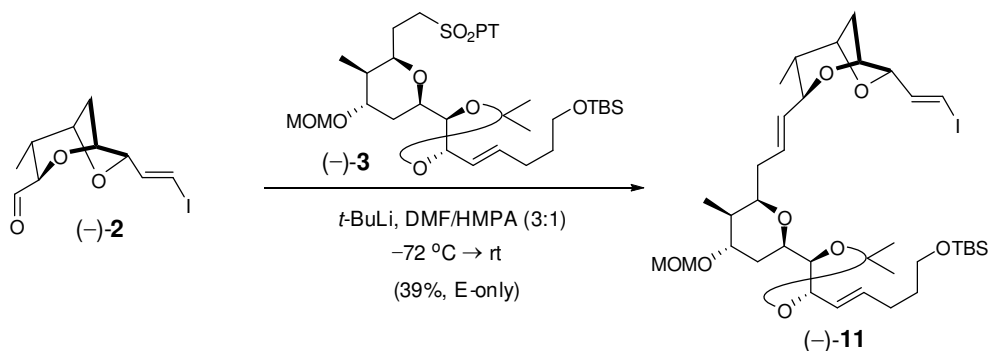

**Triene (-)-11.** At  $-72\text{ }^\circ\text{C}$ ,  $t\text{-BuLi}$  (1.7 M in pentane, 250  $\mu\text{L}$ , 420  $\mu\text{mol}$ ) was added via syringe to a solution of sulfone (-)-**3** (292 mg, 420  $\mu\text{mol}$ ) in 3:1 DMF/HMPA (5.3 mL). After 2 min, a solution of aldehyde (-)-**2** (96 mg, 312  $\mu\text{mol}$ ) in 3:1 DMF/HMPA (3.9 mL) was rapidly added via cannula, and the

resulting mixture was allowed to warm to rt over 2.5 h in the dark. A solution of saturated  $\text{NH}_4\text{Cl}$  solution (5 mL) was added to the reaction mixture, followed by  $\text{H}_2\text{O}$  (10 mL). The aqueous phase was extracted with  $\text{Et}_2\text{O}$  (3x10 mL). The combined organic layers were dried ( $\text{Na}_2\text{SO}_4$ ), filtered, and concentrated *in vacuo*. The resulting crude oil was purified by preparatory TLC ( $\text{SiO}_2$ , 1 mm) eluting with hexanes/ $\text{Et}_2\text{O}$  (1:2) to afford triene (–)-**11** (94 mg, 39%) as a pale yellow oil, along with recovered (–)-**2** (12 mg, 13%) and (–)-**3** (113 mg, 39%).  $[\alpha]_{\text{D}}^{20}$  –32.3 (*c* 0.55,  $\text{C}_6\text{H}_6$ ); IR (neat,  $\text{cm}^{-1}$ ) 1602, 1461, 1379, 1250, 1216, 1144, 1099, 1067, 1038;  $^1\text{H}$  NMR (500 MHz,  $\text{C}_6\text{D}_6$ )  $\delta$  6.82 (dd,  $J = 14.5, 4.8$  Hz, 1H), 6.43 (dd,  $J = 14.5, 1.5$  Hz, 1H), 5.93 (ddd,  $J = 15.2, 6.7, 6.7$  Hz, 1H), 5.82 (dd,  $J = 15.2, 6.3$  Hz, 1H), 5.68 (m, 1H), 5.45 (dd,  $J = 15.2, 7.1$  Hz, 1H), 4.76 (dd,  $J = 5.9, 5.9$  Hz, 1H), 4.52 (d,  $J_{AB} = 6.7$  Hz, 1H), 4.50 (d,  $J_{AB} = 6.7$  Hz, 1H), 4.05 (m, 2H), 3.98 (m, 2H), 3.91 (d,  $J = 6.3$  Hz, 1H), 3.88 (ddd,  $J = 2.6, 2.6, 2.6$  Hz, 1H), 3.83 (ddd,  $J = 4.8, 2.2, 2.2$  Hz, 1H), 3.66 (ddd,  $J = 2.9, 2.9, 2.9$  Hz, 1H), 3.61 (app t,  $J = 6.3$  Hz, 2H), 3.19 (s, 3H), 2.34 (ddd,  $J = 13.4, 6.7, 6.7$  Hz, 1H), 2.22 (m, 2H), 2.05 (m, 1H), 2.02 (d,  $J = 14.5$  Hz, 1H), 1.76–1.62 (m, 4H), 1.51 (s, 3H), 1.44 (d,  $J = 11.5$  Hz, 1H), 1.40 (ddd,  $J = 11.5, 5.9, 2.6$  Hz, 1H), 1.31 (s, 3H), 1.08 (dq,  $J = 9.3, 6.7$  Hz, 1H), 1.00 (s, 9H), 0.81 (d,  $J = 7.1$  Hz, 3H), 0.80 (d,  $J = 6.7$  Hz, 3H), 0.09 (s, 6H);  $^{13}\text{C}$  NMR (125 MHz,  $\text{C}_6\text{D}_6$ )  $\delta$  142.0, 132.7, 132.55, 129.2, 127.5, 108.3, 95.2, 83.5, 80.6, 79.4, 79.1, 78.9, 78.6, 75.8, 75.5, 73.9, 72.0, 62.7, 55.2, 41.8, 38.7, 36.3, 35.6, 323.0, 29.6, 29.1, 28.2, 26.2, 25.7, 18.5, 15.2, 10.8, –5.0; HRMS (ES)  $m/z$  ( $\text{M}+\text{Na}$ ) $^+$  calcd for  $\text{C}_{36}\text{H}_{61}\text{IO}_8\text{SiNa}^+$  799.3078, obsd 799.3081.

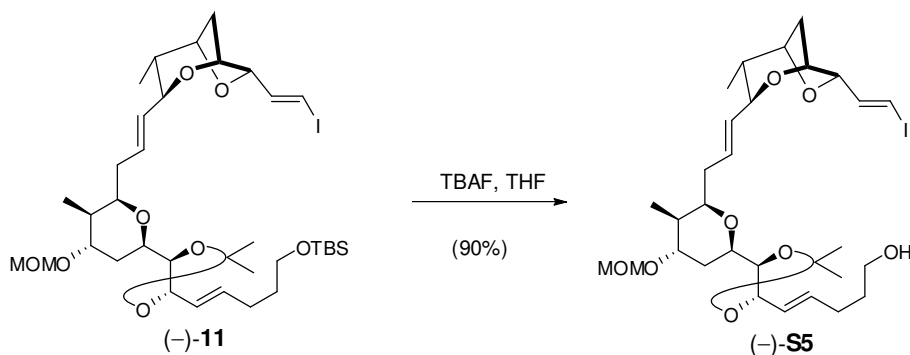

**Alcohol (–)-S5.** To a –20 °C solution of TBS ether (–)-**11** (11.1 mg, 14.2  $\mu\text{mol}$ ) in THF (500  $\mu\text{L}$ ) was added tetrabutylammonium fluoride (TBAF, 1 M in THF, 21  $\mu\text{L}$ , 21  $\mu\text{mol}$ ). The solution was then allowed to warm to room temperature. After 2 h, additional TBAF (21  $\mu\text{L}$ ) was added. After another 1.5 h, additional TBAF (21  $\mu\text{L}$ ) was again added. After 1 h, the reaction mixture was diluted with saturated  $\text{NaHCO}_3$  solution (3 mL), water (10 mL) and  $\text{EtOAc}$  (15 mL). The aqueous phase was then extracted with  $\text{EtOAc}$  (3x5 mL), and the combined organic layers were dried over  $\text{MgSO}_4$  and

concentrated *in vacuo*. Purification by flash chromatography (50% to 70% EtOAc/hexanes) afforded alcohol (–)-**S5** (8.5 mg, 90%) as a pale yellow oil.  $[\alpha]_{\text{D}}^{20}$  –26.2 (*c* 0.42, C<sub>6</sub>H<sub>6</sub>); IR (neat, cm<sup>–1</sup>) 3480, 1670, 1602, 1455, 1379, 1247, 1216, 1144, 1097, 1066, 1037; <sup>1</sup>H NMR (500 MHz, C<sub>6</sub>D<sub>6</sub>)  $\delta$  6.82 (dd, *J* = 14.6, 4.9 Hz, 1H), 6.43 (dd, *J* = 14.6, 1.7 Hz, 1H), 5.89 (ddd, *J* = 15.3, 6.6, 6.6 Hz, 1H), 5.80 (ddd, *J* = 15.3, 6.2, 0.8 Hz, 1H), 5.70 (ddd, *J* = 15.3, 6.7, 6.7 Hz, 1H), 5.45 (dd, *J* = 15.3, 7.2 Hz, 1H), 4.76 (dd, *J* = 5.8, 5.8 Hz, 1H), 4.50 (br s, 2H), 4.06 (m, 2H), 4.00 (dd, *J* = 9.2, 7.6 Hz, 1H), 3.95 (ddd, *J* = 7.1, 7.1, 1.7 Hz, 1H), 3.89 (m, 2H), 3.81 (ddd, *J* = 4.5, 2.0, 2.0 Hz, 1H), 3.64 (ddd, *J* = 2.7, 2.7, 2.7 Hz, 1H), 3.47 (app t, *J* = 6.4 Hz, 2H), 3.19 (s, 3H), 2.31 (ddd, *J* = 14.1, 7.0, 7.0 Hz, 1H), 2.14 (ddd, *J* = 7.0, 7.0, 7.0 Hz, 2H), 2.02 (m, 2H), 1.73 (m, 1H), 1.68 (m, 1H), 1.58 (m, 2H), 1.50 (s, 3H), 1.44 (dd, *J* = 11.4, 1.4 Hz, 1H), 1.38 (ddd, *J* = 11.4, 6.2, 2.7 Hz, 1H), 1.31 (s, 3H), 1.07 (dq, *J* = 9.3, 6.8 Hz, 1H), 0.80 (d, *J* = 7.0 Hz, 3H), 0.79 (d, *J* = 6.7 Hz, 3H); <sup>13</sup>C NMR (125 MHz, C<sub>6</sub>D<sub>6</sub>)  $\delta$  141.94, 132.53, 132.40, 129.63, 127.66, 108.35, 95.29, 83.54, 80.55, 79.41, 79.08, 78.65, 76.03, 75.51, 74.13, 71.99, 62.07, 55.25, 41.74, 38.72, 36.37, 35.76, 32.82, 29.62, 29.13, 28.13, 25.62, 15.17, 10.85; HRMS (ES) *m/z* (M+Na)<sup>+</sup> calcd for C<sub>30</sub>H<sub>47</sub>IO<sub>8</sub>Na<sup>+</sup> 685.2213, obsd 685.2204.

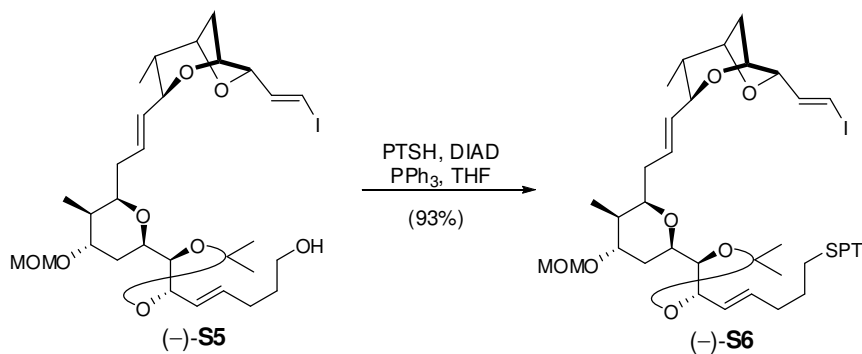

**PTS Ether (–)-S6.** To a solution of alcohol (–)-**S5** (6.9 mg, 10.4  $\mu$ mol), triphenylphosphine (4.4 mg, 16.6  $\mu$ mol) and 1-phenyl-1H-tetrazole-5-thiol (5.0 mg, 28.1  $\mu$ mol) in THF (1.3 mL) was added one drop of diisopropylazodicarboxylate (DIAD, ~5  $\mu$ L, ~25  $\mu$ mol). The resulting pale yellow solution gradually become colorless, and after 45 min, was concentrated *in vacuo* and purified via Preparative-TLC (1:1, hexanes/EtOAc on ½ of a 500 mM plate) to furnish of PTS ether (–)-**S6** (7.9 mg, 93%) as a colorless oil.  $[\alpha]_{\text{D}}^{20}$  –12.1 (*c* 0.45, C<sub>6</sub>H<sub>6</sub>); IR (neat, cm<sup>–1</sup>) 1597, 1499, 1456, 1380, 1244, 1216, 1145, 1096, 1066, 1037; <sup>1</sup>H NMR (500 MHz, C<sub>6</sub>D<sub>6</sub>)  $\delta$  7.23 (m, 2H), 6.90–6.99 (m, 3H), 6.82 (dd, *J* = 14.5, 4.9 Hz, 1H), 6.43 (dd, *J* = 14.5, 1.7 Hz, 1H), 5.81 (m, 2H), 5.71 (ddd, *J* = 15.3, 7.0, 7.0 Hz, 1H), 5.45 (dd, *J* = 15.3, 6.9 Hz, 1H), 4.74 (m, 1H), 4.51 (br s, 2H), 4.02 (m, 3H), 3.95 (m, 1H), 3.90 (m, 2H), 3.86 (m, 1H), 3.65 (ddd, *J* = 2.6, 2.6, 2.6 Hz, 1H), 3.23 (m, 2H), 3.18 (s, 3H), 2.29 (ddd, *J* = 14.1, 7.0, 7.0 Hz,

1H), 2.12 (m, 2H), 2.00 (m, 2H), 1.84 (m, 2H), 1.72 (m, 1H), 1.64 (m, 1H), 1.50 (s, 3H), 1.43 (m, 2H), 1.30 (s, 3H), 1.09 (dq,  $J = 9.7, 6.7$  Hz, 1H), 0.81 (d,  $J = 7.1$  Hz, 3H), 0.80 (d,  $J = 6.7$  Hz, 3H);  $^{13}\text{C}$  NMR (125 MHz,  $\text{C}_6\text{D}_6$ )  $\delta$  154.27, 142.03, 134.37, 132.58, 130.91, 129.56, 129.27, 128.71, 124.00, 108.40, 95.19, 83.61, 80.54, 79.40, 79.06, 78.84, 78.49, 75.75, 75.57, 73.96, 71.94, 55.22, 41.82, 38.73, 36.44, 35.80, 32.94, 31.49, 30.16, 29.68, 29.10, 28.11, 25.56, 15.23, 10.84; HRMS (ES)  $m/z$  ( $\text{M}+\text{Na}$ ) $^+$  calcd for  $\text{C}_{37}\text{H}_{51}\text{IN}_4\text{O}_7\text{SNa}^+$  845.2421, obsd 845.2408.

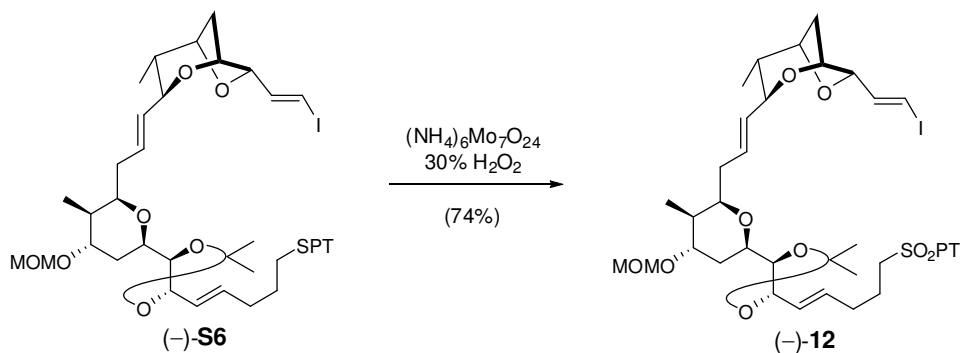

**Sulfone (–)-12.** To a 0 °C solution of PTS ether (–)-**S6** (10.1 mg, 12.2  $\mu\text{mol}$ ) in absolute EtOH (1 mL), not under argon, was added a pre-mixed solution of  $(\text{NH}_4)_6\text{Mo}_7\text{O}_{24} \cdot 4\text{H}_2\text{O}$  (5.6 mg, 4.9  $\mu\text{mol}$ ) in  $\text{H}_2\text{O}_2$  (30% aq., 40  $\mu\text{L}$ ) via a glass pipette, followed by 2x100  $\mu\text{L}$  absolute EtOH rinses. The resulting yellow solution was then removed from the ice bath and allowed to warm to room temperature. After 8 h, the reaction mixture was diluted with diethyl ether (10 mL), saturated  $\text{NaHCO}_3$  solution (5 mL) and water (10 mL). The aqueous layer was then extracted with diethyl ether (3x5 mL), and the combined organic layers were dried over  $\text{MgSO}_4$  and concentrated *in vacuo*. Purification via preparative-TLC (2:1, hexanes/EtOAc, 500  $\mu\text{M}$  plate) furnished sulfone (–)-**12** (7.7 mg, 74%) as a colorless oil.  $[\alpha]_{\text{D}}^{20}$   $-20.3$  ( $c$  0.32,  $\text{C}_6\text{H}_6$ ); IR (neat,  $\text{cm}^{-1}$ ) 1598, 1498, 1479, 1461, 1343, 1247, 1216, 1153, 1097, 1066, 1037;  $^1\text{H}$  NMR (500 MHz,  $\text{C}_6\text{D}_6$ )  $\delta$  7.36 (m, 2H), 6.90 (m, 3H), 6.82 (dd,  $J = 14.5, 5.0$  Hz, 1H), 6.42 (dd,  $J = 14.5, 1.7$  Hz, 1H), 5.79 (dd,  $J = 15.4, 5.9$  Hz, 1H), 5.68–5.76 (m, 2H), 5.47 (dd,  $J = 15.3, 6.9$  Hz, 1H), 4.71 (dd,  $J = 5.7, 5.7$  Hz, 1H), 4.55 (br s, 2H), 4.01 (m, 3H), 3.96 (m, 1H), 3.89 (m, 2H), 3.84 (ddd,  $J = 5.0, 1.8, 1.8$  Hz, 1H), 3.65 (ddd,  $J = 2.6, 2.6, 2.6$  Hz, 1H), 3.53–3.43 (m, 2H), 3.21 (s, 3H), 2.29 (ddd,  $J = 14.1, 7.1, 7.1$  Hz, 1H), 2.04–1.92 (m, 6H), 1.74 (m, 1H), 1.64 (m, 1H), 1.51 (s, 3H), 1.42 (m, 2H), 1.30 (s, 3H), 1.09 (dq,  $J = 9.3, 6.7$  Hz, 1H), 0.81 (br d,  $J = 7.0$  Hz, 6H);  $^{13}\text{C}$  NMR (125 MHz,  $\text{C}_6\text{D}_6$ )  $\delta$  154.17, 141.99, 133.60, 132.65, 130.89, 129.86, 129.58, 129.45, 129.35, 108.48, 95.21, 83.65, 80.48, 79.38, 79.20, 78.67, 78.48, 75.72, 75.58, 73.96, 71.89, 55.74, 55.24, 41.87, 38.72, 36.44, 35.84, 30.86, 29.68, 28.10, 25.54, 22.21, 15.22, 10.83; HRMS (ES)  $m/z$  ( $\text{M}+\text{Na}$ ) $^+$  calcd for  $\text{C}_{37}\text{H}_{51}\text{IN}_4\text{O}_9\text{SNa}^+$  877.2319, obsd 877.2283.

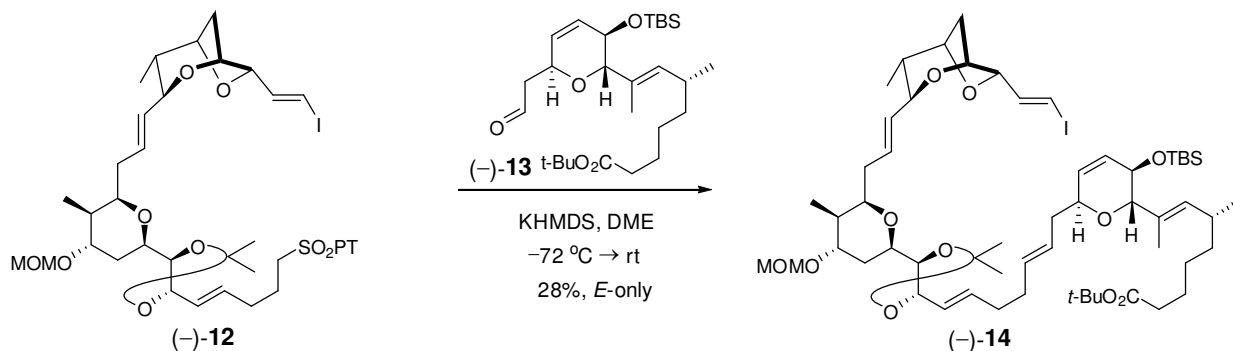

**TBS Ether (-)-14.** At  $-72\text{ }^{\circ}\text{C}$ , KHMDS (0.5 M in PhMe, 23  $\mu\text{L}$ , 11.5  $\mu\text{mol}$ ) was added via syringe to a solution of (-)-12 (8 mg, 9.35  $\mu\text{mol}$ ) in DME (0.12 mL). After 10 min, the bright yellow mixture was treated via cannula with a solution of (-)-13 (6 mg, 12.2  $\mu\text{mol}$ ) in DME (0.12 mL) and the mixture was allowed to warm to rt over 2 h. The reaction mixture was quenched with saturated  $\text{NH}_4\text{Cl}$  solution (2 mL). The aqueous phase was extracted with  $\text{Et}_2\text{O}$  (3x1 mL) and the combined organic layers were dried ( $\text{MgSO}_4$ ), filtered, and concentrated *in vacuo*. The crude mixture was purified by flash chromatography ( $\text{SiO}_2$ ) eluting with 3:1 hexanes/ $\text{EtOAc}$  to afford TBS ether (-)-14 (2.9 mg, 28%) as a pale yellow oil, along with recovered sulfone (-)-12 (4 mg, 50%) and aldehyde (-)-13 (2.4 mg, 40%).  $[\alpha]_{\text{D}}^{24} -34.9$  (*c* 0.59,  $\text{C}_6\text{H}_6$ ); IR (neat,  $\text{cm}^{-1}$ ) 1730, 1459, 1368, 1251, 1150, 1066, 1038, 971, 837, 775;  $^1\text{H}$  NMR (500 MHz,  $\text{CDCl}_3$ )  $\delta$  6.84-6.79 (dd,  $J = 14.5, 4.5$  Hz, 1H), 6.56-6.52 (dd,  $J = 14.6, 1.7$  Hz, 1H), 5.80-5.69 (m, 3H), 5.60-5.46 (m, 3H), 5.44-5.35 (m, 1H), 5.25-5.22 (d,  $J = 9.0$  Hz, 1H), 4.67-4.59 (m, 3H), 4.35-4.33 (m, 1H), 4.31-4.28 (m, 1H), 4.24-4.22 (d,  $J = 6.4$  Hz, 1H), 4.14-4.08 (m, 2H), 3.93-3.90 (m, 1H), 3.87-3.84 (t,  $J = 8.0$  Hz, 1H), 3.77-3.69 (m, 3 H), 3.67-3.65 (d,  $J = 7.8$  Hz, 1H), 3.34 (s, 3H), 2.44-2.35 (m, 2H), 2.29-2.21 (m, 2H), 2.19-2.02 (m, 7H), 1.98-1.86 (m, 1H), 1.86-1.83 (m, 1H), 1.78-1.73 (m, 1H), 1.71-1.65 (m, 1H), 1.63-1.59 (m, 4H), 1.58-1.49 (m, 6H), 1.42 (s, 9H), 1.38-1.15 (m, 11H), 0.94-0.77 (m, 15H), 0.05-0.01 (d,  $J = 21.5$  Hz, 6H);  $^{13}\text{C}$  NMR (125 MHz,  $\text{CDCl}_3$ )  $\delta$  173.2, 141.0, 136.6, 133.7, 132.4, 131.7, 131.1, 130.3, 130.1, 129.73, 129.66, 126.5, 125.9, 108.2, 94.9, 83.5, 79.9, 79.8, 79.4, 79.3, 78.9, 78.7, 77.8, 75.6, 75.3, 73.6, 73.2, 71.6, 65.8, 55.4, 41.3, 37.1, 37.0, 36.9, 35.8, 35.6, 35.1, 32.4, 32.3, 31.9, 29.7, 28.6, 28.1, 27.7, 26.8, 25.9, 25.4, 25.3, 22.7, 20.3, 18.1, 15.1, 14.1, 12.8, 10.6, -4.2, -4.5; HRMS (ES)  $m/z$  ( $\text{M}+\text{Na}$ ) $^{+}$  calcd for  $\text{C}_{57}\text{H}_{93}\text{IO}_{11}\text{SiNa}^{+}$  1131.5429, obsd 1131.5425.

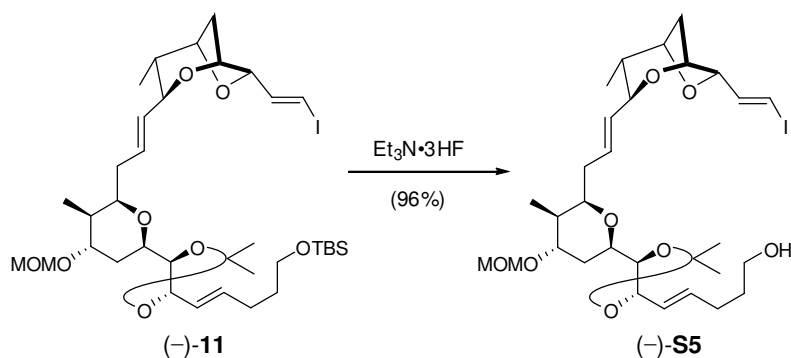

**Alcohol (-)-S5:** TBS ether (-)-**11** (44 mg, 57  $\mu\text{mol}$ ) was dissolved in THF (1.1 mL) in a polyethylene vial. Neat  $\text{Et}_3\text{N}\cdot 3\text{HF}$  (65  $\mu\text{L}$ , 0.39 mmol) was added via autopipetter and the resulting solution was stirred in the dark for 17 h. The reaction mixture was concentrated *in vacuo* and directly purified by flash chromatography ( $\text{SiO}_2$ ) eluting with 2:3 hexanes/ $\text{EtOAc}$  to afford (-)-**S5** (36 mg, 96%) as a pale yellow oil. All characterization data are same as above.

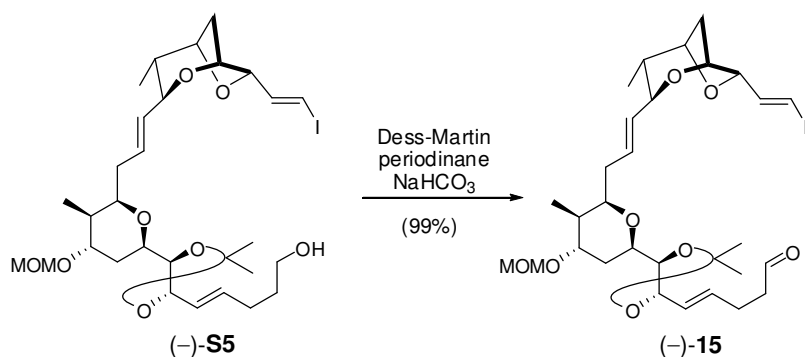

**Aldehyde (-)-15:** At room temperature, solid Dess-Martin periodinane (35 mg, 82  $\mu\text{mol}$ ) was added in one portion to a slurry of (-)-**S5** (18 mg, 27  $\mu\text{mol}$ ) and  $\text{NaHCO}_3$  (27 mg, 0.33 mmol) in  $\text{CH}_2\text{Cl}_2$  (1.4 mL). The mixture was stirred in the dark for 2 h and then diluted with  $\text{Et}_2\text{O}$  (1.5 mL), whereupon a 1:1:1 solution of saturated  $\text{NaHCO}_3$ /brine/ $\text{Na}_2\text{S}_2\text{O}_3$  (3 mL) was added and stirring was continued until the aqueous layer became homogenous (20 min). The layers were separated and the aqueous phase was extracted with  $\text{Et}_2\text{O}$  (2x1 mL). The combined organic extracts were dried ( $\text{Na}_2\text{SO}_4$ ), filtered through a pad of  $\text{SiO}_2$  (5 g) with an  $\text{Et}_2\text{O}$  rinse (10 mL) and concentrated *in vacuo*. The crude residue was purified by flash chromatography ( $\text{SiO}_2$ ) eluting with 1:1 hexanes/ $\text{EtOAc}$  to afford (-)-**15** (17.7 mg, 99%) as a pale yellow oil.  $[\alpha]_{\text{D}}^{24} -31.9$  (c 1.0,  $\text{C}_6\text{H}_6$ ); IR (neat,  $\text{cm}^{-1}$ ) 1724, 1457, 1378, 1216, 1144, 1101, 1066, 1036, 970, 941, 877, 799, 676;  $^1\text{H}$  NMR (500 MHz,  $\text{C}_6\text{D}_6$ )  $\delta$  9.39-9.38 (m, 1H), 6.83-6.79 (dd,  $J = 14.5$ , 4.5 Hz, 1H), 6.46-6.42 (dd,  $J = 15.0$ , 2.0 Hz, 1H), 5.84-5.67 (m, 3H), 5.49-5.44 (dd,  $J = 15.5$ , 7.0 Hz, 1H), 4.73-4.70 (t,  $J = 6.0$  Hz, 1H), 4.53 (s, 2H), 4.05-3.94 (m, 4H), 3.92-3.90 (d,  $J = 5.5$  Hz, 1H), 3.98-

3.87 (m, 1H), 3.85-3.82 (m, 1H), 3.67-3.65 (m, 1H), 3.21 (s, 3H), 2.33-2.20 (m, 2H), 2.08-1.97 (m, 4H), 1.77-1.71 (m, 1H), 1.68-1.62 (m, 1H), 1.51 (s, 3H), 1.43-1.27 (m, 6H), 1.11-1.05 (m, 1H), 0.87-0.75 (m, 6H);  $^{13}\text{C}$  NMR (125 MHz,  $\text{C}_6\text{D}_6$ )  $\delta$  200.6, 142.4, 133.0, 131.1, 129.6, 108.8, 95.6, 84.0, 80.9, 79.8, 79.3, 79.2, 78.8, 76.2, 75.9, 74.4, 72.3, 55.6, 43.6, 42.2, 39.1, 36.8, 36.2, 30.5, 30.1, 28.5, 26.0, 25.6, 21.6, 15.6, 11.2; HRMS (ES)  $m/z$  ( $\text{M}+\text{Na}$ ) $^+$  calcd for  $\text{C}_{30}\text{H}_{45}\text{IO}_8\text{Na}^+$  683.2057, obsd 683.2081.

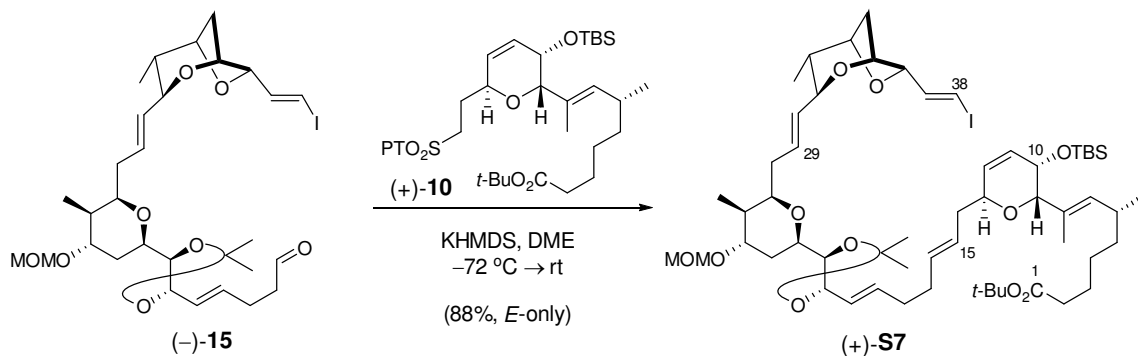

**TBS Ether (+)-S7.** At  $-72^\circ\text{C}$ , KHMDS (0.5 M in PhMe, 30  $\mu\text{L}$ , 15  $\mu\text{mol}$ ) was added via syringe to a solution of (+)-**10** (10.2 mg, 15  $\mu\text{mol}$ ) in DME (0.16 mL). After 10 min, the bright yellow mixture was treated via cannula with a solution of (–)-**15** (5 mg, 7.6  $\mu\text{mol}$ ) in DME (0.16 mL) and the mixture was allowed to warm to rt over 2 h. The reaction mixture was quenched with saturated  $\text{NH}_4\text{Cl}$  solution (5 mL). The aqueous phase was extracted with  $\text{Et}_2\text{O}$  (3x5 mL) and the combined organic layers were dried ( $\text{Na}_2\text{SO}_4$ ), filtered, and concentrated *in vacuo*. The crude mixture was purified by flash chromatography ( $\text{SiO}_2$ , 5% to 30%  $\text{EtOAc}$ /hexanes, silica gel was pretreated with 0.5%  $\text{Et}_3\text{N}$ ) to afford TBS ether (+)-**S7** (7.4 mg, 88%) as a pale yellow oil, along with recovered sulfone (+)-**10** (5.2 mg, 51%).  $[\alpha]_{\text{D}}^{29} +26.0$  ( $c$  0.54,  $\text{C}_6\text{H}_6$ ); IR (neat,  $\text{cm}^{-1}$ ) 1730, 1457, 1367, 1251, 1099, 1066, 1038, 837, 775;  $^1\text{H}$  NMR (500 MHz,  $\text{C}_6\text{D}_6$ )  $\delta$  6.84 (dd,  $J = 14.6, 4.8$  Hz, 1H), 6.46 (dd,  $J = 14.6, 1.8$  Hz, 1H), 5.96 (ddd,  $J = 15.2, 6.8, 6.8$  Hz, 1H), 5.88 (ddd,  $J = 10.2, 4.7, 2.1$  Hz, 1H), 5.83 (dd,  $J = 15.2, 6.4$  Hz, 1H), 5.76 (dd,  $J = 10.2, 2.5$  Hz, 1H), 5.71 (ddd,  $J = 15.2, 7.8, 7.8$  Hz, 1H), 5.57-5.53 (m, 3H), 5.46 (dd,  $J = 15.2, 7.1$  Hz, 1H), 4.79 (dd,  $J = 5.5, 5.5$  Hz, 1H), 4.54 (ABq,  $J = 6.9$  Hz,  $\Delta\nu = 10.1$  Hz, 2H), 4.29-4.26 (m, 1H), 4.12 (s, 1H), 4.08-4.06 (m, 3H), 4.04-3.96 (m, 2H), 3.93 (d,  $J = 6.0$  Hz, 1H), 3.91 (s, 1H), 3.87-3.85 (m, 1H), 3.69-3.67 (m, 1H), 3.21 (s, 3H), 2.45-2.40 (m, 2H), 2.37-2.31 (m, 1H), 2.27-2.18 (m, 7H), 2.06-2.00 (m, 2H), 1.84 (s, 3H), 1.74-1.62 (m, 4H), 1.54 (s, 3H), 1.48-1.40 (m, 2H), 1.42 (s, 9H), 1.34 (s, 3H), 1.31-1.27 (m, 4H), 1.12-1.06 (m, 1H), 1.04 (d,  $J = 6.6$  Hz, 3H), 1.00 (s, 9H), 0.83 (d,  $J = 7.1$  Hz, 3H), 0.82 (d,  $J = 6.7$  Hz, 3H), 0.12 (s, 3H), 0.08 (s, 3H);  $^{13}\text{C}$  NMR (125 MHz,  $\text{C}_6\text{D}_6$ )  $\delta$  172.6, 142.1, 133.2, 132.65, 132.54, 132.47, 132.1, 131.3, 129.5, 127.64, 127.62, 127.0, 108.4, 95.2, 83.6, 80.7, 79.5, 79.4, 79.14,

79.05, 78.6, 76.8, 75.8, 75.5, 74.0, 72.8, 72.0, 66.1, 55.3, 41.8, 38.8, 37.8, 37.0, 36.5, 35.9, 35.8, 33.0, 32.9, 32.3, 29.7, 28.2 (4C), 27.5, 26.2 (3C), 25.8, 25.7, 21.3, 18.5, 15.3, 14.6, 10.9, -3.6, -4.1; HRMS (ES)  $m/z$  (M+Na)<sup>+</sup> calcd for C<sub>57</sub>H<sub>93</sub>IO<sub>11</sub>SiNa<sup>+</sup> 1131.5429, obsd 1131.5415.

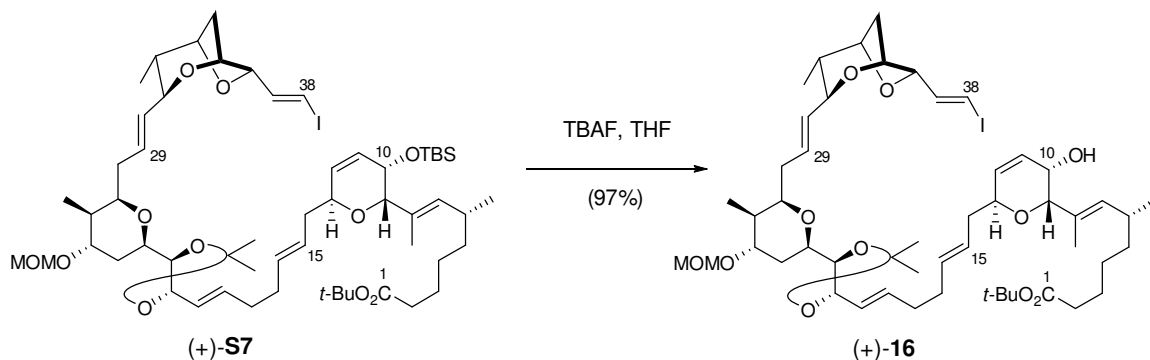

**Vinyl Iodide (-)-16.** Solid TBAF·3H<sub>2</sub>O (33 mg, 0.126 mmol) was added to a solution of (+)-**S7** (7 mg, 6.3 μmol) in THF (0.15 mL) at rt. The reaction mixture was stirred in the dark for 20 h, and then diluted with Et<sub>2</sub>O (2 mL) and saturated NH<sub>4</sub>Cl solution (2 mL). The aqueous phase was extracted with Et<sub>2</sub>O (4×2 mL). The combined organic extracts were dried (Na<sub>2</sub>SO<sub>4</sub>), filtered through a short plug of SiO<sub>2</sub>, washed with additional Et<sub>2</sub>O (25 mL), and concentrated *in vacuo*. The resulting crude product was purified by flash chromatography (SiO<sub>2</sub>, 0.5% to 1.5% MeOH/CH<sub>2</sub>Cl<sub>2</sub>, silica gel was pretreated with 0.5% Et<sub>3</sub>N) to afford vinyl iodide (+)-**16** (6.1 mg, 97%) as a pale yellow oil.  $[\alpha]_D^{29} +26.9$  (c 0.32, C<sub>6</sub>H<sub>6</sub>); IR (neat, cm<sup>-1</sup>) 3436, 1729, 1456, 1367, 1217, 1149, 1066, 1038, 970; <sup>1</sup>H NMR (500 MHz, C<sub>6</sub>D<sub>6</sub>) δ 6.85 (dd, *J* = 14.6, 4.9 Hz, 1H), 6.46 (dd, *J* = 14.6, 1.8 Hz, 1H), 6.00 (ddd, *J* = 10.2, 5.6, 1.9 Hz, 1H), 5.96 (ddd, *J* = 15.2, 6.6, 6.6 Hz, 1H), 5.84 (dd, *J* = 15.2, 6.4 Hz, 1H), 5.75 (dd, *J* = 10.2, 3.3 Hz, 1H), 5.71 (ddd, *J* = 15.2, 8.5, 6.7 Hz, 1H), 5.60 (ddd, *J* = 9.7, 1.3, 1.3 Hz, 1H), 5.57-5.47 (m, 2H), 5.46 (dd, *J* = 15.2, 7.1 Hz, 1H), 4.80 (dd, *J* = 5.8, 5.8 Hz, 1H), 4.54 (ABq, *J* = 6.8 Hz, Δ*v* = 9.7 Hz, 2H), 4.31-4.27 (m, 1H), 4.08-3.97 (m, 5H), 3.93 (d, *J* = 6.0 Hz, 1H), 3.91-3.90 (m, 1H), 3.86-3.84 (m, 1H), 3.78-3.77 (m, 1H), 3.69-3.67 (m, 1H), 3.21 (s, 3H), 2.45-2.32 (m, 3H), 2.23-2.15 (m, 7H), 2.07-2.01 (m, 2H), 1.72 (d, *J* = 0.8 Hz, 3H), 1.70-1.57 (m, 4H), 1.54 (s, 3H), 1.47-1.40 (m, 2H), 1.41 (s, 9H), 1.33 (s, 3H), 1.31-1.24 (m, 4H), 1.12-1.06 (m, 1H), 0.98 (d, *J* = 6.7 Hz, 3H), 0.83 (d, *J* = 7.1 Hz, 3H), 0.82 (d, *J* = 6.7 Hz, 3H); <sup>13</sup>C NMR (125 MHz, C<sub>6</sub>D<sub>6</sub>) δ 172.7, 142.1, 132.8, 132.6, 132.5, 132.4, 132.3, 131.3, 129.5, 127.7, 127.6, 126.9, 108.4, 95.2, 83.6, 80.7, 79.44, 79.36, 79.12, 79.08, 78.7, 76.8, 75.8, 75.5, 75.0, 74.1, 74.0, 72.0, 63.3, 55.3, 41.8, 38.8, 37.8, 36.5, 36.3, 35.84, 35.77, 33.0, 32.9, 32.2, 29.7, 28.2 (4C), 27.5, 25.72, 25.68, 21.6, 15.3, 14.3, 10.9; HRMS (ES)  $m/z$  (M+Na)<sup>+</sup> calcd for C<sub>51</sub>H<sub>79</sub>IO<sub>11</sub>Na<sup>+</sup> 1017.4565, obsd 1017.4566.

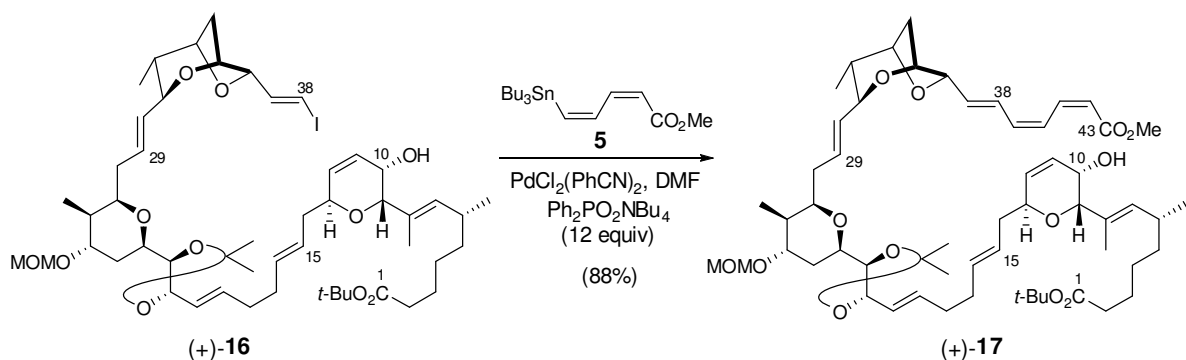

**Trienoate (+)-17.** A 15 mL round bottom flask was charged with stannane **5** (16 mg, 40  $\mu\text{mol}$ ), vinyl iodide (+)-**16** (10 mg, 10  $\mu\text{mol}$ ),  $\text{Ph}_2\text{PO}_2\text{NBu}_4$  (55 mg, 120  $\mu\text{mol}$ ), and dissolved in degassed DMF (1.1 mL). To this was added  $\text{PdCl}_2(\text{PhCN})_2$  (0.2 mg, 0.5  $\mu\text{mol}$ ), and the reaction mixture was purged with argon for 5 min, and stirred at rt in the dark overnight. The reaction mixture was diluted with  $\text{Et}_2\text{O}$ /hexanes (1:1, 4 mL), filtered through a Celite plug into brine (5 mL), and rinsed with  $\text{Et}_2\text{O}$ /hexanes (1:1, 20 mL). The mixture was extracted using  $\text{Et}_2\text{O}$ /hexanes (1:1, 3 $\times$ 10 mL), and the combined organic layers were washed with brine, dried ( $\text{Na}_2\text{SO}_4$ ) and concentrated *in vacuo* to give a crude residue, which was purified by flash chromatography ( $\text{SiO}_2$ , 0.2% to 1.5%  $\text{MeOH}/\text{CH}_2\text{Cl}_2$ , silica gel was pretreated with 0.5%  $\text{Et}_3\text{N}$ ) to afford trienoate (+)-**17** (8.6 mg, 88%) as a yellow oil.  $[\alpha]_{\text{D}}^{29} +49.0$  (*c* 0.26,  $\text{C}_6\text{H}_6$ ); IR (neat,  $\text{cm}^{-1}$ ) 3417, 1720, 1650, 1612, 1454, 1368, 1246, 1218, 1149, 1097, 1067, 1038, 974, 876;  $^1\text{H}$  NMR (500 MHz,  $\text{C}_6\text{D}_6$ )  $\delta$  7.75 (dd,  $J = 11.5, 11.5$  Hz, 1H), 7.05-7.00 (m, 1H), 6.88 (dd,  $J = 11.5, 11.5$  Hz, 1H), 6.26 (dd,  $J = 11.5, 11.5$  Hz, 1H), 6.10 (dd,  $J = 15.3, 4.9$  Hz, 1H), 6.01 (ddd,  $J = 10.2, 5.6, 2.0$  Hz, 1H), 5.93 (ddd,  $J = 15.4, 6.4, 6.4$  Hz, 1H), 5.82 (dd,  $J = 15.4, 6.3$  Hz, 1H), 5.74 (dd,  $J = 10.2, 3.2$  Hz, 1H), 5.71 (ddd,  $J = 15.2, 7.6, 7.6$  Hz, 1H), 5.64 (d,  $J = 11.5$  Hz, 1H), 5.59 (d,  $J = 9.5$  Hz, 1H), 5.54-5.43 (m, 3H), 4.78 (dd,  $J = 5.8, 5.8$  Hz, 1H), 4.51 (ABq,  $J = 6.8$  Hz,  $\Delta\nu = 11.0$  Hz, 2H), 4.30-4.26 (m, 1H), 4.24-4.23 (m, 1H), 4.11-4.04 (m, 6H), 4.00-3.96 (m, 1H), 3.80-3.78 (m, 1H), 3.67-3.65 (m, 1H), 3.38 (s, 3H), 3.19 (s, 3H), 2.46-2.33 (m, 3H), 2.19-2.13 (m, 7H), 2.08-2.02 (m, 2H), 1.79-1.47 (m, 6H), 1.73 (s, 3H), 1.53 (s, 3H), 1.41 (s, 9H), 1.33 (s, 3H), 1.31-1.23 (m, 4H), 1.20-1.14 (m, 1H), 0.99 (d,  $J = 6.6$  Hz, 3H), 0.94 (d,  $J = 6.8$  Hz, 3H), 0.82 (d,  $J = 7.0$  Hz, 3H);  $^{13}\text{C}$  NMR (125 MHz,  $\text{C}_6\text{D}_6$ )  $\delta$  172.7, 166.5, 138.7, 136.9, 134.6, 132.8, 132.7, 132.5, 132.3 (2C), 131.4, 129.1, 127.7, 127.6, 126.9, 126.8, 125.0, 118.0, 108.4, 95.2, 82.0, 80.7, 79.5, 79.4, 79.1, 78.7, 76.4, 75.9, 75.0, 74.1, 74.0, 72.0, 63.4, 55.2, 50.8, 42.0, 39.3, 37.8, 36.5, 36.3, 35.83, 35.77, 33.0, 32.8, 32.2, 29.7, 28.2 (4C), 27.5, 25.7 (2C), 21.6, 15.4, 14.3, 10.9; HRMS (ES)  $m/z$  ( $\text{M}+\text{Na}$ ) $^+$  calcd for  $\text{C}_{57}\text{H}_{86}\text{O}_{13}\text{Na}^+$  1001.5966, obsd 1001.5975.

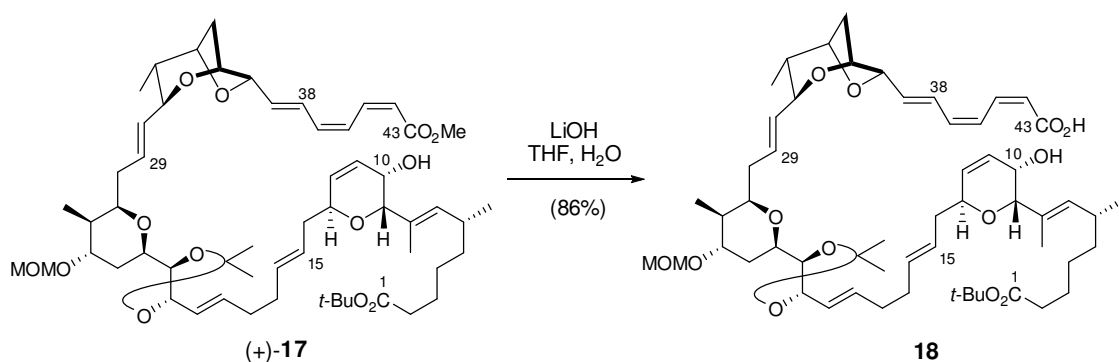

**Seco Acid 18.** A solution of trienoate (+)-**17** (6.6 mg, 6.7  $\mu\text{mol}$ ) in THF (1.6 mL) and H<sub>2</sub>O (0.4 mL) was treated with 1 M LiOH solution (0.4 mL). The yellow reaction mixture was stirred for 1.5 days at rt in the dark. Brine (1 mL) was added and the pH value of the reaction mixture was adjusted to ca. 3 with 1 M NaHSO<sub>4</sub>. The aqueous layer was extracted with EtOAc (4 $\times$ 2 mL), and the combined organic layers were washed with brine (2 mL), dried (Na<sub>2</sub>SO<sub>4</sub>) and concentrated *in vacuo* to give a crude residue, which was purified by flash chromatography (SiO<sub>2</sub>, 0.5% to 5% MeOH/CH<sub>2</sub>Cl<sub>2</sub>) to afford seco acid **18** (5.6 mg, 86%) as a yellow oil. Seco acid **18** proved very unstable, and was carried on to the next step immediately after the <sup>1</sup>H NMR spectrum was taken. <sup>1</sup>H NMR (500 MHz, C<sub>6</sub>D<sub>6</sub>)  $\delta$  7.64 (dd,  $J$  = 11.5, 11.5 Hz, 1H), 7.03-6.97 (m, 1H), 6.89 (dd,  $J$  = 11.5, 11.5 Hz, 1H), 6.27 (dd,  $J$  = 11.5, 11.5 Hz, 1H), 6.08 (dd,  $J$  = 15.0, 4.7 Hz, 1H), 6.02 (ddd,  $J$  = 10.1, 5.8, 2.0 Hz, 1H), 5.93 (ddd,  $J$  = 15.4, 6.3, 6.3 Hz, 1H), 5.81 (dd,  $J$  = 15.4, 6.3 Hz, 1H), 5.74 (dd,  $J$  = 10.1, 3.1 Hz, 1H), 5.67-5.58 (m, 3H), 5.52-5.41 (m, 3H), 4.78 (dd,  $J$  = 5.5, 5.5 Hz, 1H), 4.53 (ABq,  $J$  = 6.9 Hz,  $\Delta\nu$  = 9.8 Hz, 2H), 4.33-4.28 (m, 1H), 4.24-4.23 (m, 1H), 4.09-4.04 (m, 6H), 3.98-3.95 (m, 1H), 3.82 (dd,  $J$  = 5.6, 2.0 Hz, 1H), 3.68-3.67 (m, 1H), 3.20 (s, 3H), 2.47-2.34 (m, 3H), 2.19-2.12 (m, 7H), 2.11-2.01 (m, 2H), 1.74 (d,  $J$  = 0.7 Hz, 3H), 1.72-1.47 (m, 6H), 1.53 (s, 3H), 1.41 (s, 9H), 1.33 (s, 3H), 1.31-1.24 (m, 4H), 1.18-1.12 (m, 1H), 1.00 (d,  $J$  = 6.7 Hz, 3H), 0.92 (d,  $J$  = 6.7 Hz, 3H), 0.83 (d,  $J$  = 7.1 Hz, 3H).

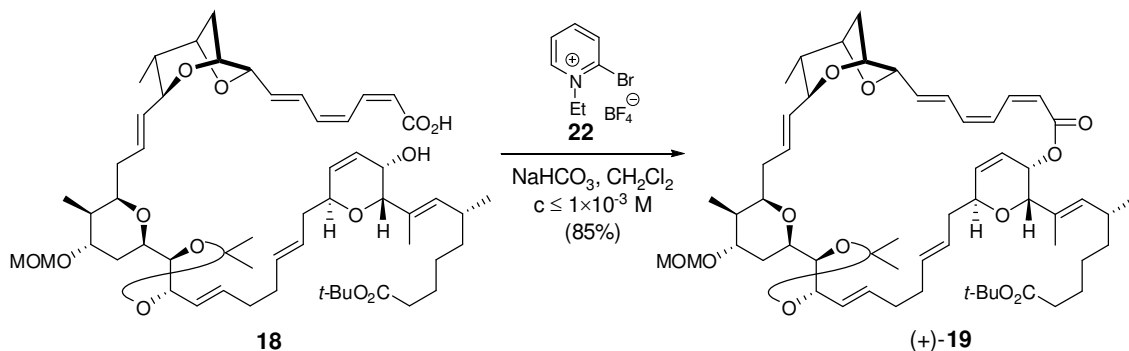

**Macrolide (+)-19.** A slurry of seco acid **18** (5.4 mg, 5.6  $\mu\text{mol}$ ) and  $\text{NaHCO}_3$  (120 mg, 1.4 mmol) in  $\text{CH}_2\text{Cl}_2$  (12 mL) was treated with solid 2-bromo-1-ethylpyridinium tetrafluoroborate **22** (31 mg, 0.11 mmol) in one portion. The reaction mixture was vigorously stirred in the dark overnight, then transferred directly onto a silica gel column and purified by flash chromatography (0.2% to 1.6%  $\text{MeOH}/\text{CH}_2\text{Cl}_2$ ) to afford macrolide (+)-**19** (4.5 mg, 85%) as a pale yellow foam.  $[\alpha]_{\text{D}}^{28} +41.6$  ( $c$  0.36,  $\text{MeOH}$ ); IR (neat,  $\text{cm}^{-1}$ ) 1722, 1698, 1610, 1452, 1367, 1250, 1211, 1148, 1095, 1066, 1037, 971, 916, 871;  $^1\text{H}$  NMR (500 MHz,  $\text{CD}_3\text{OD}$ )  $\delta$  7.16-7.06 (m, 2H), 7.04-6.99 (m, 1H), 6.44 (dd,  $J = 10.6, 10.6$  Hz, 1H), 6.26 (dd,  $J = 15.4, 3.3$  Hz, 1H), 6.14 (dd,  $J = 10.1, 3.1$  Hz, 1H), 6.02 (ddd,  $J = 10.1, 5.9, 2.1$  Hz, 1H), 5.73 (ddd,  $J = 15.1, 6.7, 6.7$  Hz, 1H), 5.61 (d,  $J = 10.5$  Hz, 1H), 5.56-5.52 (m, 3H), 5.38-5.34 (m, 3H), 5.26 (d,  $J = 10.1$  Hz, 1H), 4.64 (ABq,  $J = 7.1$  Hz,  $\Delta\nu = 17.6$  Hz, 2H), 4.61-4.57 (m, 2H), 4.41-4.39 (m, 2H), 4.31 (d,  $J = 6.3$  Hz, 1H), 4.21 (s, 1H), 3.94 (dd,  $J = 8.4, 6.3$  Hz, 1H), 3.84 (dd,  $J = 9.6, 7.5$  Hz, 1H), 3.77-3.68 (m, 3H), 3.32 (s, 3H), 2.42-2.33 (m, 2H), 2.23-2.01 (m, 9H), 1.92 (d,  $J = 10.5$  Hz, 1H), 1.75 (d,  $J = 13.8$  Hz, 1H), 1.69-1.62 (m, 2H), 1.61 (d,  $J = 0.8$  Hz, 3H), 1.60-1.50 (m, 2H), 1.44 (s, 9H), 1.42 (s, 3H), 1.41-1.36 (m, 1H), 1.32 (s, 3H), 1.27-1.15 (m, 4H), 0.90 (d,  $J = 7.2$  Hz, 3H), 0.86 (d,  $J = 6.6$  Hz, 3H), 0.79 (d,  $J = 6.8$  Hz, 3H);  $^{13}\text{C}$  NMR (125 MHz,  $\text{CD}_3\text{OD}$ )  $\delta$  174.9, 167.8, 138.9, 137.7, 137.1, 135.7, 134.2, 133.9, 133.6 (2C), 131.24, 131.17, 128.0, 127.9, 127.6, 126.8, 123.7, 119.8, 109.8, 96.0, 81.9, 81.22 (2C), 81.18, 81.09, 80.1, 77.7, 76.6, 74.9, 74.4, 73.8, 73.3, 66.6, 55.8, 41.8, 39.6, 38.9, 36.7 (2C), 35.6, 35.1, 34.1, 33.1, 32.9, 30.8, 30.4, 28.5 (3C), 28.3, 28.2, 26.3, 25.7, 22.3, 15.3, 14.5, 10.8; HRMS (ES)  $m/z$  ( $\text{M}+\text{Na}$ ) $^+$  calcd for  $\text{C}_{56}\text{H}_{82}\text{O}_{12}\text{Na}^+$  969.5704, obsd 969.5670.

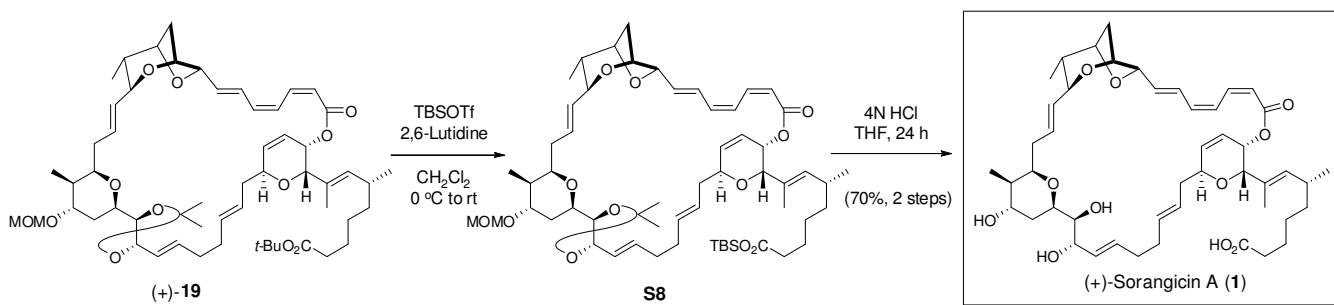

**(+)-Sorangicin A (1).** To a stirred solution of macrolide (+)-**19** (3.5 mg, 3.7  $\mu\text{mol}$ ) and 2,6-lutidine (13  $\mu\text{L}$ , 111  $\mu\text{mol}$ ) in  $\text{CH}_2\text{Cl}_2$  (200  $\mu\text{L}$ ) was added TBSOTf (9  $\mu\text{L}$ , 37  $\mu\text{mol}$ ) at 0  $^\circ\text{C}$ . After 30 min at 0  $^\circ\text{C}$ , the reaction mixture was warmed to rt and stirred for 3 h before being quenched with 0.2N HCl (1 mL). The aqueous layer was extracted with  $\text{Et}_2\text{O}$  (4 $\times$ 2 mL), and the combined organic layers were washed with brine (2 mL), dried ( $\text{Na}_2\text{SO}_4$ ) and evaporated to give the crude TBS ester **S8**.

Without further purification, TBS ester **S8** was dissolved in THF (200  $\mu$ L) and treated with 4N HCl (200  $\mu$ L) at 0  $^{\circ}$ C. The reaction mixture was warmed to rt and stirred for 24 h before being cooled to 0  $^{\circ}$ C and carefully neutralized with saturated NaHCO<sub>3</sub> solution (2 mL), and then acidified with HCOOH (0.5 mL, pH~3). The aqueous phase was extracted with CH<sub>2</sub>Cl<sub>2</sub> (4 $\times$ 3 mL), and the combined organic layers were concentrated *in vacuo* to give a crude residue, which was purified by flash chromatography (SiO<sub>2</sub>, 1% to 5% MeOH/CH<sub>2</sub>Cl<sub>2</sub>) to furnish (+)-sorangicin A (**1**) (2.1 mg, 70%, 2 steps) as an off-white solid.  $[\alpha]_{\text{D}}^{20}$  +56 (*c* 0.06, MeOH); <sup>1</sup>H NMR (500 MHz, CD<sub>3</sub>OD)  $\delta$  7.22-7.12 (m, 2H, 40-H, 41-H), 6.99 (dd, *J* = 15.0, 11.0 Hz, 1H, 38-H), 6.44 (dd, *J* = 10.5, 10.5 Hz, 1H, 39-H), 6.22 (dd, *J* = 15.5, 4.5 Hz, 1H, 37-H), 6.13 (dd, *J* = 9.9, 3.0 Hz, 1H, 12-H), 6.01 (ddd, *J* = 9.9, 5.7, 2.0 Hz, 1H, 11-H), 5.75 (ddd, *J* = 15.4, 6.2, 6.2 Hz, 1H, 19-H), 5.62 (d, *J* = 10.6 Hz, 1H, 42-H), 5.60 (dd, *J* = 15.4, 7.4 Hz, 1H, 20-H), 5.55-5.53 (m, 2H, 15-H, 16-H), 5.52-5.48 (m, 1H, 29-H), 5.38 (ddd, *J* = 15.0, 8.4, 1.0 Hz, 1H, 30-H), 5.32-5.30 (m, 2H, 7-H, 10-H), 4.57 (br s, 1H, 36-H), 4.40-4.38 (m, 2H, 35-H, 13-H), 4.28 (d, *J* = 6.2 Hz, 1H, 33-H), 4.23 (s, 1H, 9-H), 4.15 (dd, *J* = 7.4, 4.5 Hz, 1H, 21-H), 3.88-3.82 (m, 3H, 27-H, 25-H, 31-H), 3.71 (ddd, *J* = 11.0, 7.3, 2.7 Hz, 1H, 23-H), 3.48 (dd, *J* = 7.3, 4.5 Hz, 1H, 22-H), 2.42-2.36 (m, 2H, 14-H<sub>a</sub>, 6-H), 2.28-2.22 (m, 1H, 28-H<sub>a</sub>), 2.23 (t, *J* = 7.5 Hz, 2H, 2-H), 2.19-2.09 (m, 6H, 17-H, 14-H<sub>b</sub>, 28-H<sub>b</sub>, 18-H), 2.05 (ddd, *J* = 11.5, 6.5, 2.6 Hz, 1H, 34-H<sub>a</sub>), 1.93 (dd, *J* = 11.5, 1.5 Hz, 1H, 34-H<sub>b</sub>), 1.74 (ddd, *J* = 14.0, 2.5, 2.5 Hz, 1H, 24-H<sub>a</sub>), 1.66 (ddd, *J* = 14.0, 11.5, 2.6 Hz, 1H, 24-H<sub>b</sub>), 1.63 (d, *J* = 0.7 Hz, 3H, 45-H), 1.61-1.53 (m, 3H, 3-H, 26-H), 1.42 (m, 1H, 32-H), 1.37-1.16 (m, 4H, 5-H, 4-H), 0.88 (d, *J* = 7.2 Hz, 3H, 46-H), 0.87 (d, *J* = 6.6 Hz, 3H, 44-H), 0.82 (d, *J* = 6.8 Hz, 3H, 47-H); <sup>13</sup>C NMR (125 MHz, CD<sub>3</sub>OD)  $\delta$  179.18 (C-1), 167.66 (C-43), 139.16 (C-41), 137.77 (C-39), 136.95 (C-12), 134.94 (C-37), 134.61 (C-19), 134.10 (C-7), 133.69 (C-16), 132.98 (C-29), 132.79 (C-30), 131.09 (C-8), 129.96 (C-20), 128.25 (C-15), 127.74 (C-38), 126.96 (C-40), 123.71 (C-11), 119.55 (C-42), 82.08 (C-36), 81.20 (C-31), 80.98 (C-33), 77.76 (C-22), 77.49 (C-35), 75.23 (C-13), 74.85 (C-23), 74.67 (C-27), 74.37 (C-21), 74.17 (C-9), 71.01 (C-25), 66.68 (C-10), 42.06 (C-32), 39.80 (C-34), 38.69 (C-5), 38.28 (C-26), 37.14 (C-28), 36.23 (C-2), 35.34 (C-14), 34.20 (C-18), 33.51 (C-17), 32.96 (C-6), 30.89 (C-24), 28.40 (C-4), 26.64 (C-3), 21.85 (C-44), 15.39 (C-47), 14.39 (C-45), 10.85 (C-46); HRMS (ES) *m/z* (M+Na)<sup>+</sup> calcd for C<sub>47</sub>H<sub>66</sub>O<sub>11</sub>Na<sup>+</sup> 829.4503, obsd 829.4507.

<sup>1</sup>H NMR Chemical Shifts of (+)-Sorangicin A  
δ (ppm in CD<sub>3</sub>OD)

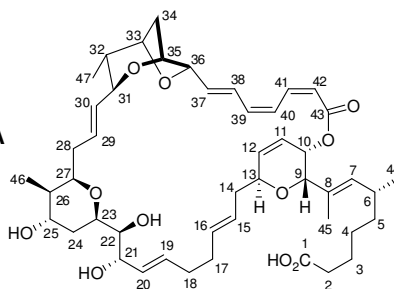

| Proton Number                                      | Synthetic (+)-Sorangicin A                    | Natural (+)-Sorangicin A                      |
|----------------------------------------------------|-----------------------------------------------|-----------------------------------------------|
| 40-H, 41-H                                         | 7.22-7.12 (m, 2H)                             | 7.22-7.12 (m, 2H)                             |
| 38-H                                               | 6.99 (dd, <i>J</i> = 15.0, 11.0 Hz, 1H)       | 6.99 (dd, <i>J</i> = 14.9, 11.1 Hz, 1H)       |
| 39-H                                               | 6.44 (dd, <i>J</i> = 10.5, 10.5 Hz, 1H)       | 6.44 (dd, <i>J</i> = 10.6, 10.6 Hz, 1H)       |
| 37-H                                               | 6.22 (dd, <i>J</i> = 15.5, 4.5 Hz, 1H)        | 6.22 (dd, <i>J</i> = 15.4, 4.7 Hz, 1H)        |
| 12-H                                               | 6.13 (dd, <i>J</i> = 9.9, 3.0 Hz, 1H)         | 6.13 (dd, <i>J</i> = 10.0, 3.1 Hz, 1H)        |
| 11-H                                               | 6.01 (ddd, <i>J</i> = 9.9, 5.7, 2.0 Hz, 1H)   | 6.01 (ddd, <i>J</i> = 10.0, 5.8, 2.1 Hz, 1H)  |
| 19-H                                               | 5.75 (ddd, <i>J</i> = 15.4, 6.2, 6.2 Hz, 1H)  | 5.75 (ddd, <i>J</i> = 15.4, 6.2, 6.2 Hz, 1H)  |
| 42-H                                               | 5.62 (d, <i>J</i> = 10.6 Hz, 1H)              | 5.62 (d, <i>J</i> = 10.5 Hz, 1H)              |
| 20-H                                               | 5.60 (dd, <i>J</i> = 15.4, 7.4 Hz, 1H)        | 5.60 (dd, <i>J</i> = 15.5, 7.5 Hz, 1H)        |
| 15-H, 16-H                                         | 5.55-5.53 (m, 2H)                             | 5.55-5.53 (m, 2H)                             |
| 29-H                                               | 5.52-5.48 (m, 1H)                             | 5.52-5.48 (m, 1H)                             |
| 30-H                                               | 5.38 (ddd, <i>J</i> = 15.0, 8.4, 1.0 Hz, 1H)  | 5.38 (ddd, <i>J</i> = 15.0, 8.5, 1.0 Hz, 1H)  |
| 7-H, 10-H                                          | 5.32-5.30 (m, 2H)                             | 5.32-5.30 (m, 2H)                             |
| 36-H                                               | 4.57 (br s, 1H)                               | 4.57 (br s, 1H)                               |
| 35-H, 13-H                                         | 4.40-4.38 (m, 2H)                             | 4.40-4.38 (m, 2H)                             |
| 33-H                                               | 4.28 (d, <i>J</i> = 6.2 Hz, 1H)               | 4.28 (d, <i>J</i> = 6.4 Hz, 1H)               |
| 9-H                                                | 4.23 (s, 1H)                                  | 4.23 (s, 1H)                                  |
| 21-H                                               | 4.15 (dd, <i>J</i> = 7.4, 4.5 Hz, 1H)         | 4.15 (dd, <i>J</i> = 7.4, 4.6 Hz, 1H)         |
| 27-H, 25-H, 31-H                                   | 3.88-3.82 (m, 3H)                             | 3.88-3.82 (m, 3H)                             |
| 23-H                                               | 3.71 (ddd, <i>J</i> = 11.0, 7.3, 2.7 Hz, 1H)  | 3.71 (ddd, <i>J</i> = 11.0, 7.3, 2.7 Hz, 1H)  |
| 22-H                                               | 3.48 (dd, <i>J</i> = 7.3, 4.5 Hz, 1H)         | 3.48 (dd, <i>J</i> = 7.2, 4.6 Hz, 1H)         |
| 14-H <sub>a</sub> , 6-H                            | 2.42-2.36 (m, 2H)                             | 2.42-2.36 (m, 2H)                             |
| 28-H <sub>a</sub>                                  | 2.28-2.22 (m, 1H)                             | 2.28-2.23 (m, 1H)                             |
| 2-H                                                | 2.23 (t, <i>J</i> = 7.5 Hz, 2H)               | 2.24 (t, <i>J</i> = 7.6 Hz, 2H)               |
| 17-H, 14-H <sub>b</sub> , 28-H <sub>b</sub> , 18-H | 2.19-2.09 (m, 6H)                             | 2.19-2.09 (m, 6H)                             |
| 34-H <sub>a</sub>                                  | 2.05 (ddd, <i>J</i> = 11.5, 6.5, 2.6 Hz, 1H)  | 2.05 (ddd, <i>J</i> = 11.6, 6.5, 2.8 Hz, 1H)  |
| 34-H <sub>b</sub>                                  | 1.93 (dd, <i>J</i> = 11.5, 1.5 Hz, 1H)        | 1.93 (dd, <i>J</i> = 11.6, 1.4 Hz, 1H)        |
| 24-H <sub>a</sub>                                  | 1.74 (ddd, <i>J</i> = 14.0, 2.5, 2.5 Hz, 1H)  | 1.73 (ddd, <i>J</i> = 14.0, 2.5, 2.5 Hz, 1H)  |
| 24-H <sub>b</sub>                                  | 1.66 (ddd, <i>J</i> = 14.0, 11.5, 2.6 Hz, 1H) | 1.66 (ddd, <i>J</i> = 14.0, 11.6, 2.6 Hz, 1H) |
| 45-H                                               | 1.63 (d, <i>J</i> = 0.7 Hz, 3H)               | 1.63 (d, <i>J</i> = 0.6 Hz, 3H)               |
| 3-H, 26-H                                          | 1.61-1.53 (m, 3H)                             | 1.60-1.53 (m, 3H)                             |
| 32-H                                               | 1.42 (m, 1H)                                  | 1.42 (m, 1H)                                  |
| 5-H, 4-H                                           | 1.37-1.16 (m, 4H)                             | 1.38-1.16 (m, 4H)                             |
| 46-H                                               | 0.88 (d, <i>J</i> = 7.2 Hz, 3H)               | 0.88 (d, <i>J</i> = 7.4 Hz, 3H)               |
| 44-H                                               | 0.87 (d, <i>J</i> = 6.6 Hz, 3H)               | 0.87 (d, <i>J</i> = 6.5 Hz, 3H)               |
| 47-H                                               | 0.82 (d, <i>J</i> = 6.8 Hz, 3H)               | 0.82 (d, <i>J</i> = 6.5 Hz, 3H)               |

**$^{13}\text{C}$  NMR Chemical Shifts of (+)-Sorangicin A**  
 $\delta$  (ppm in  $\text{CD}_3\text{OD}$ )

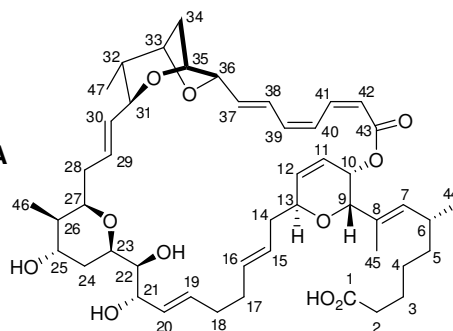

| Carbon Number | Synthetic (+)-Sorangicin A | Natural (+)-Sorangicin A |
|---------------|----------------------------|--------------------------|
| C-1           | 179.18                     | 178.61                   |
| C-43          | 167.66                     | 167.66                   |
| C-41          | 139.16                     | 139.19                   |
| C-39          | 137.77                     | 137.78                   |
| C-12          | 136.95                     | 136.96                   |
| C-37          | 134.94                     | 134.93                   |
| C-19          | 134.61                     | 134.63                   |
| C-7           | 134.10                     | 134.10                   |
| C-16          | 133.69                     | 133.70                   |
| C-29          | 132.98                     | 132.97                   |
| C-30          | 132.79                     | 132.80                   |
| C-8           | 131.09                     | 131.17                   |
| C-20          | 129.96                     | 129.95                   |
| C-15          | 128.25                     | 128.25                   |
| C-38          | 127.74                     | 127.74                   |
| C-40          | 126.96                     | 126.96                   |
| C-11          | 123.71                     | 123.70                   |
| C-42          | 119.55                     | 119.55                   |
| C-36          | 82.08                      | 82.09                    |
| C-31          | 81.20                      | 81.21                    |
| C-33          | 80.98                      | 80.99                    |
| C-22          | 77.76                      | 77.76                    |
| C-35          | 77.49                      | 77.49                    |
| C-13          | 75.23                      | 75.22                    |
| C-23          | 74.85                      | 74.85                    |
| C-27          | 74.67                      | 74.67                    |
| C-21          | 74.37                      | 74.36                    |
| C-9           | 74.17                      | 74.19                    |
| C-25          | 71.01                      | 71.01                    |
| C-10          | 66.68                      | 66.73                    |
| C-32          | 42.06                      | 42.05                    |
| C-34          | 39.80                      | 39.81                    |
| C-5           | 38.69                      | 38.64                    |
| C-26          | 38.28                      | 38.30                    |
| C-28          | 37.14                      | 37.14                    |

| Carbon Number | Synthetic (+)-Sorangicin A | Natural (+)-Sorangicin A |
|---------------|----------------------------|--------------------------|
| C-2           | 36.23                      | 35.78                    |
| C-14          | 35.34                      | 35.34                    |
| C-18          | 34.20                      | 34.20                    |
| C-17          | 33.51                      | 33.51                    |
| C-6           | 32.96                      | 32.95                    |
| C-24          | 30.89                      | 30.88                    |
| C-4           | 28.40                      | 28.33                    |
| C-3           | 26.64                      | 26.46                    |
| C-44          | 21.85                      | 21.84                    |
| C-47          | 15.39                      | 15.39                    |
| C-45          | 14.39                      | 14.38                    |
| C-46          | 10.85                      | 10.85                    |

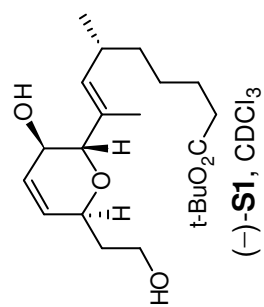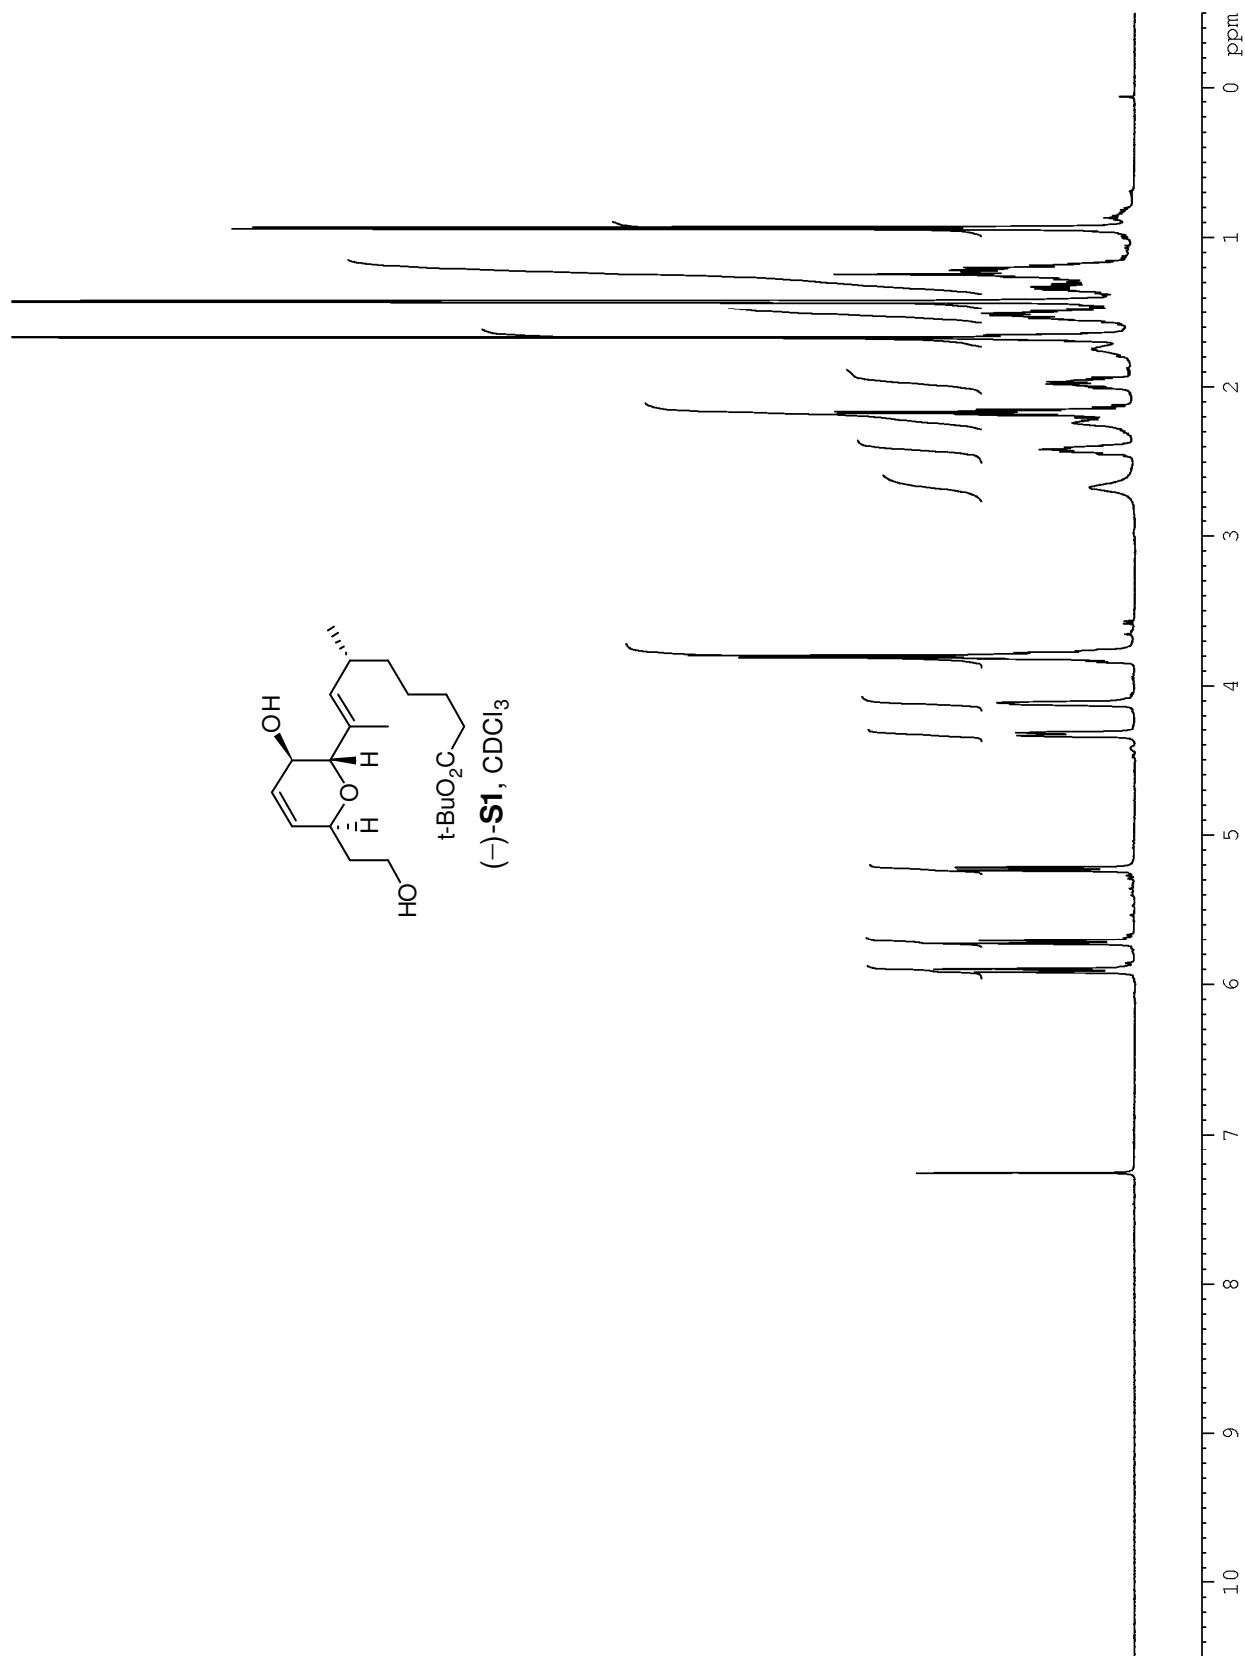

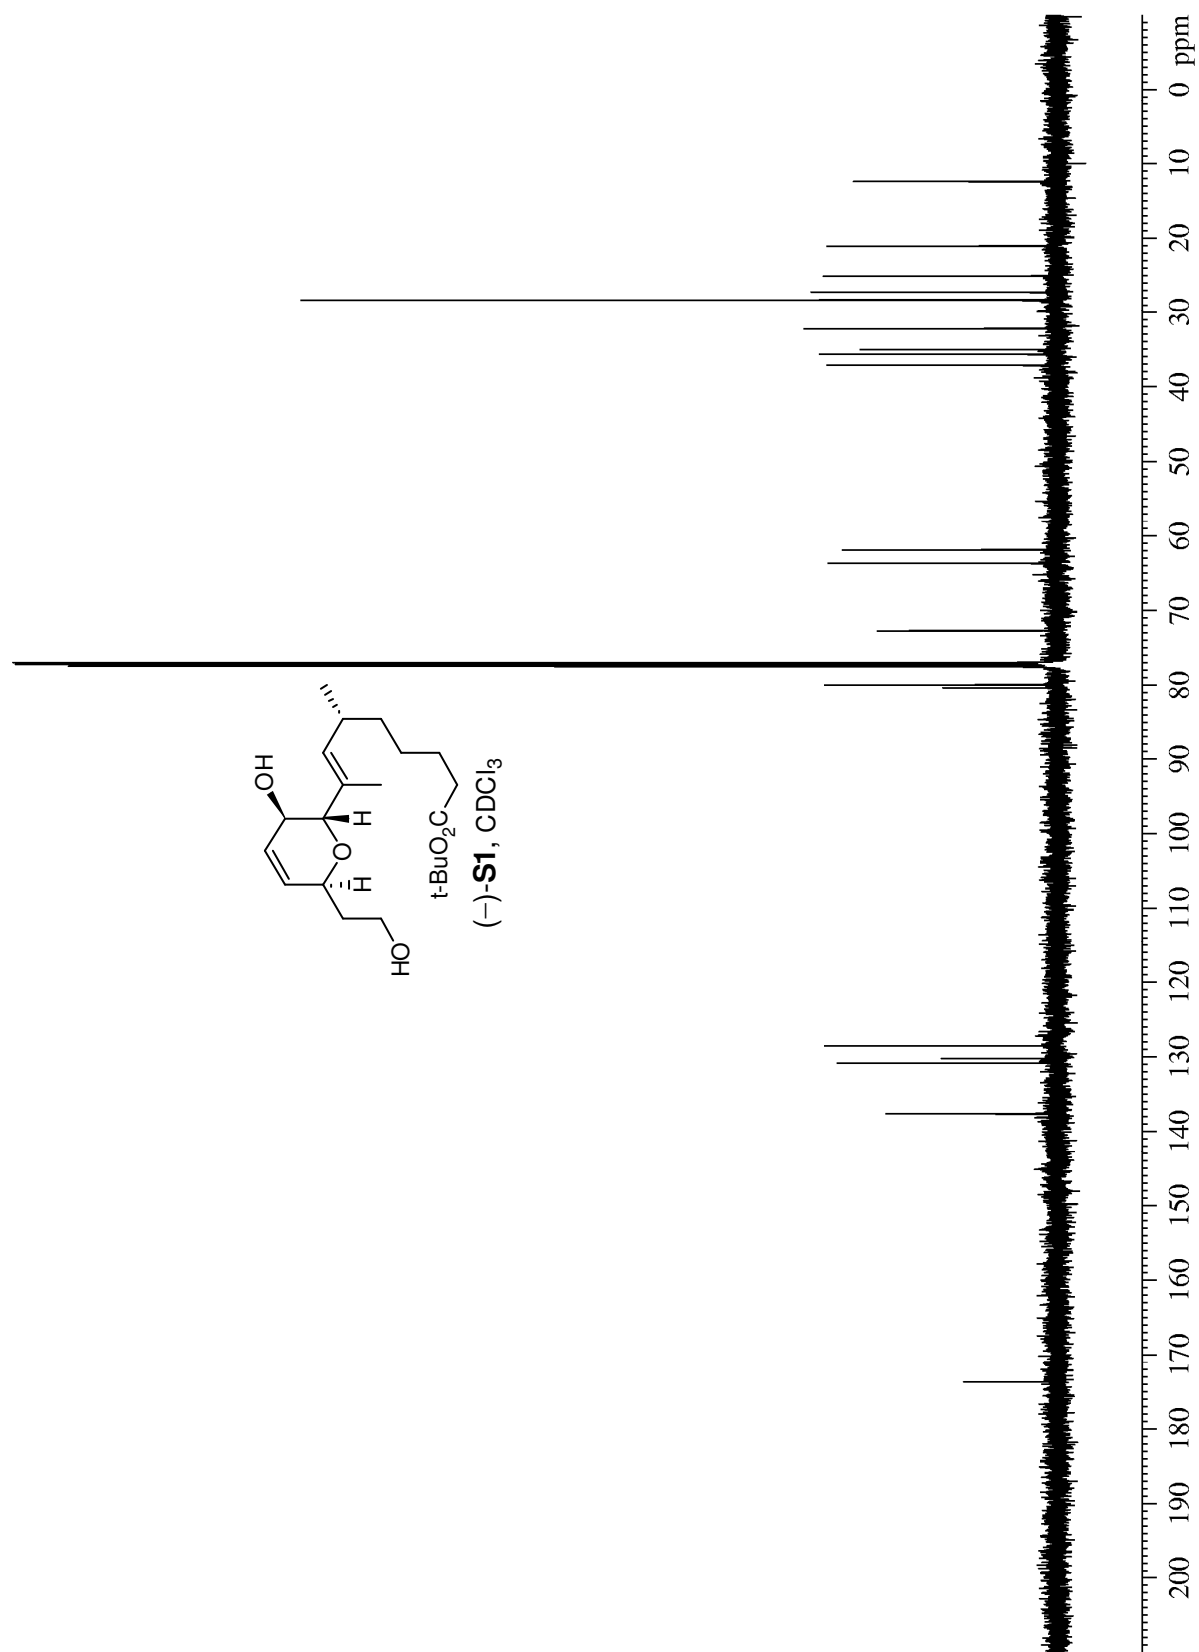

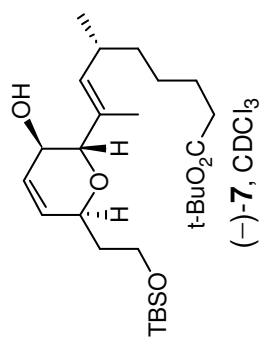

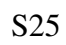

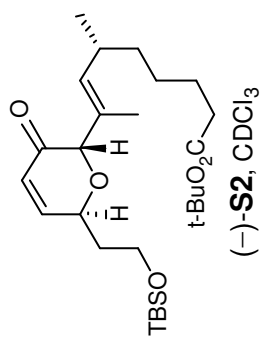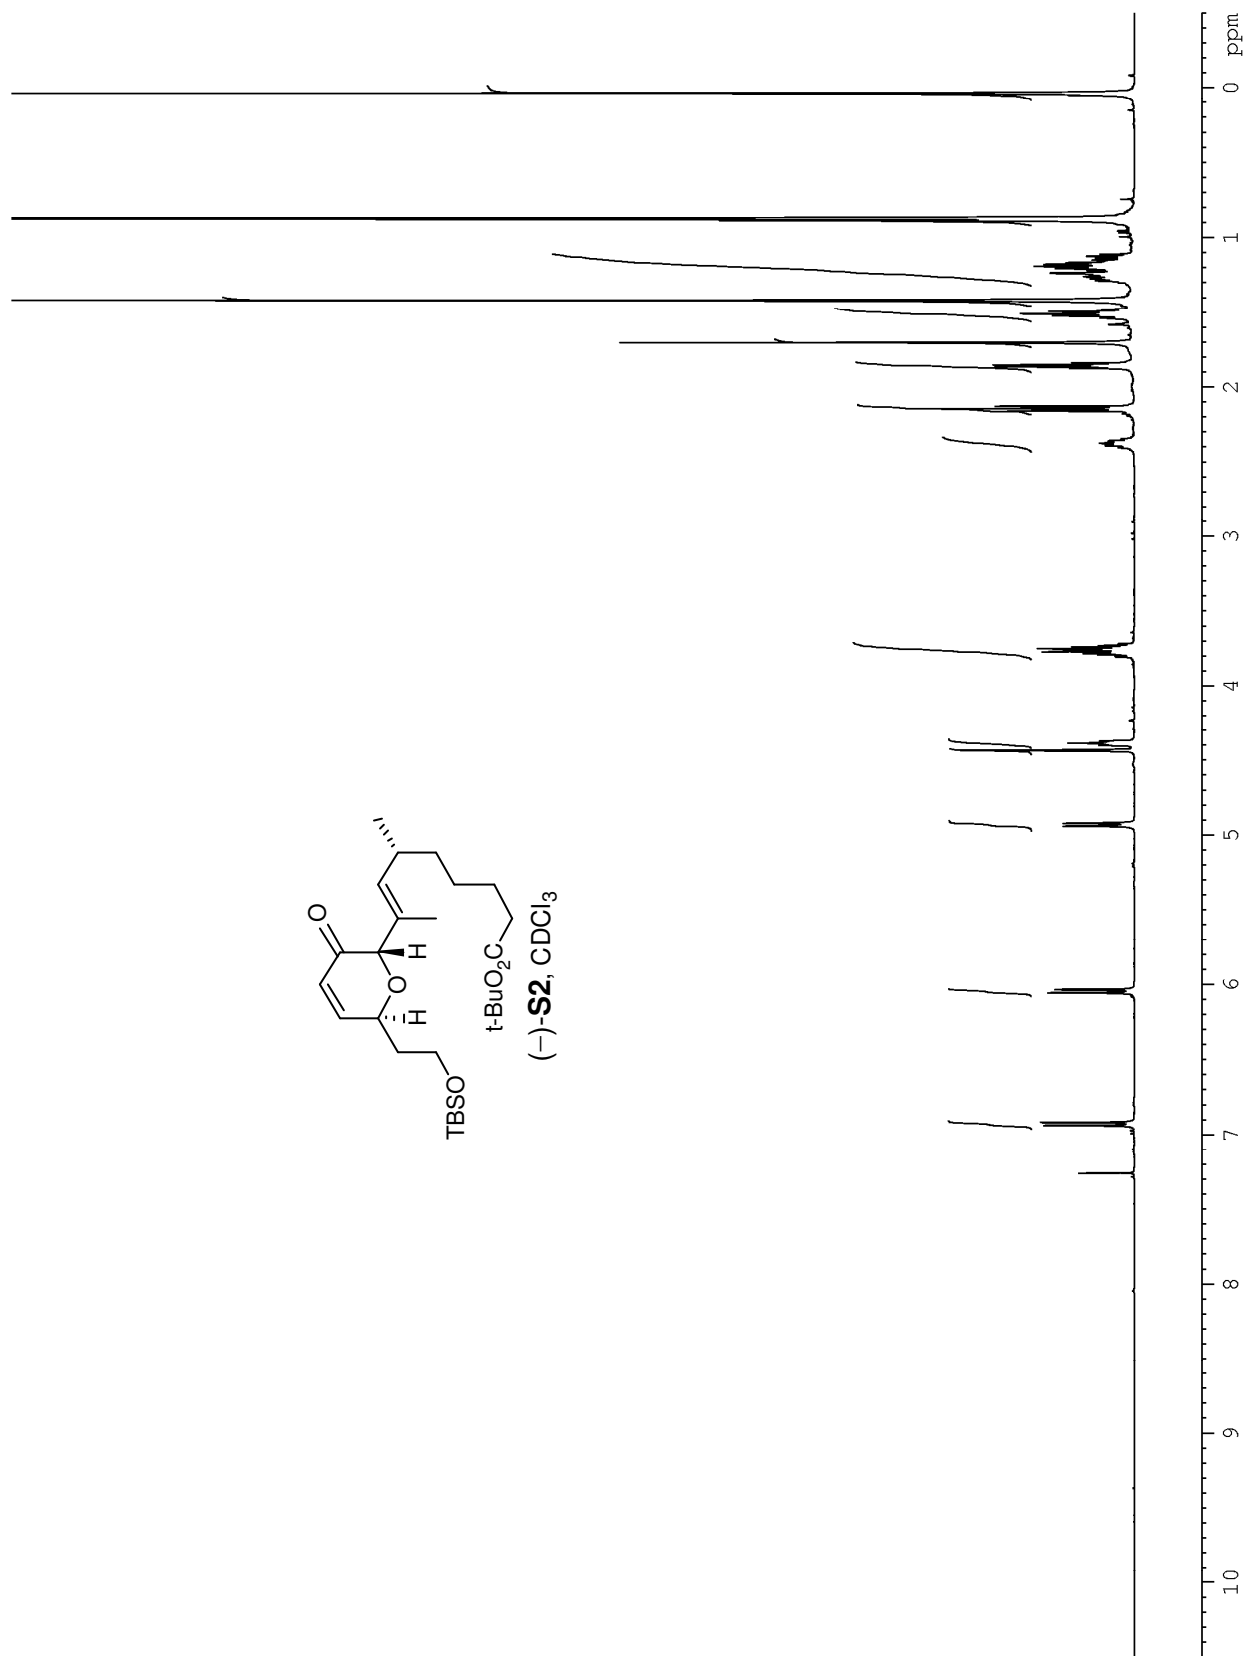

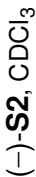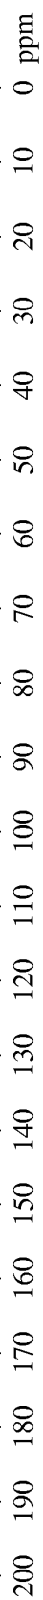

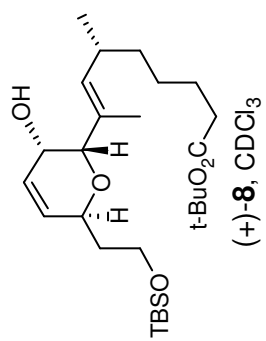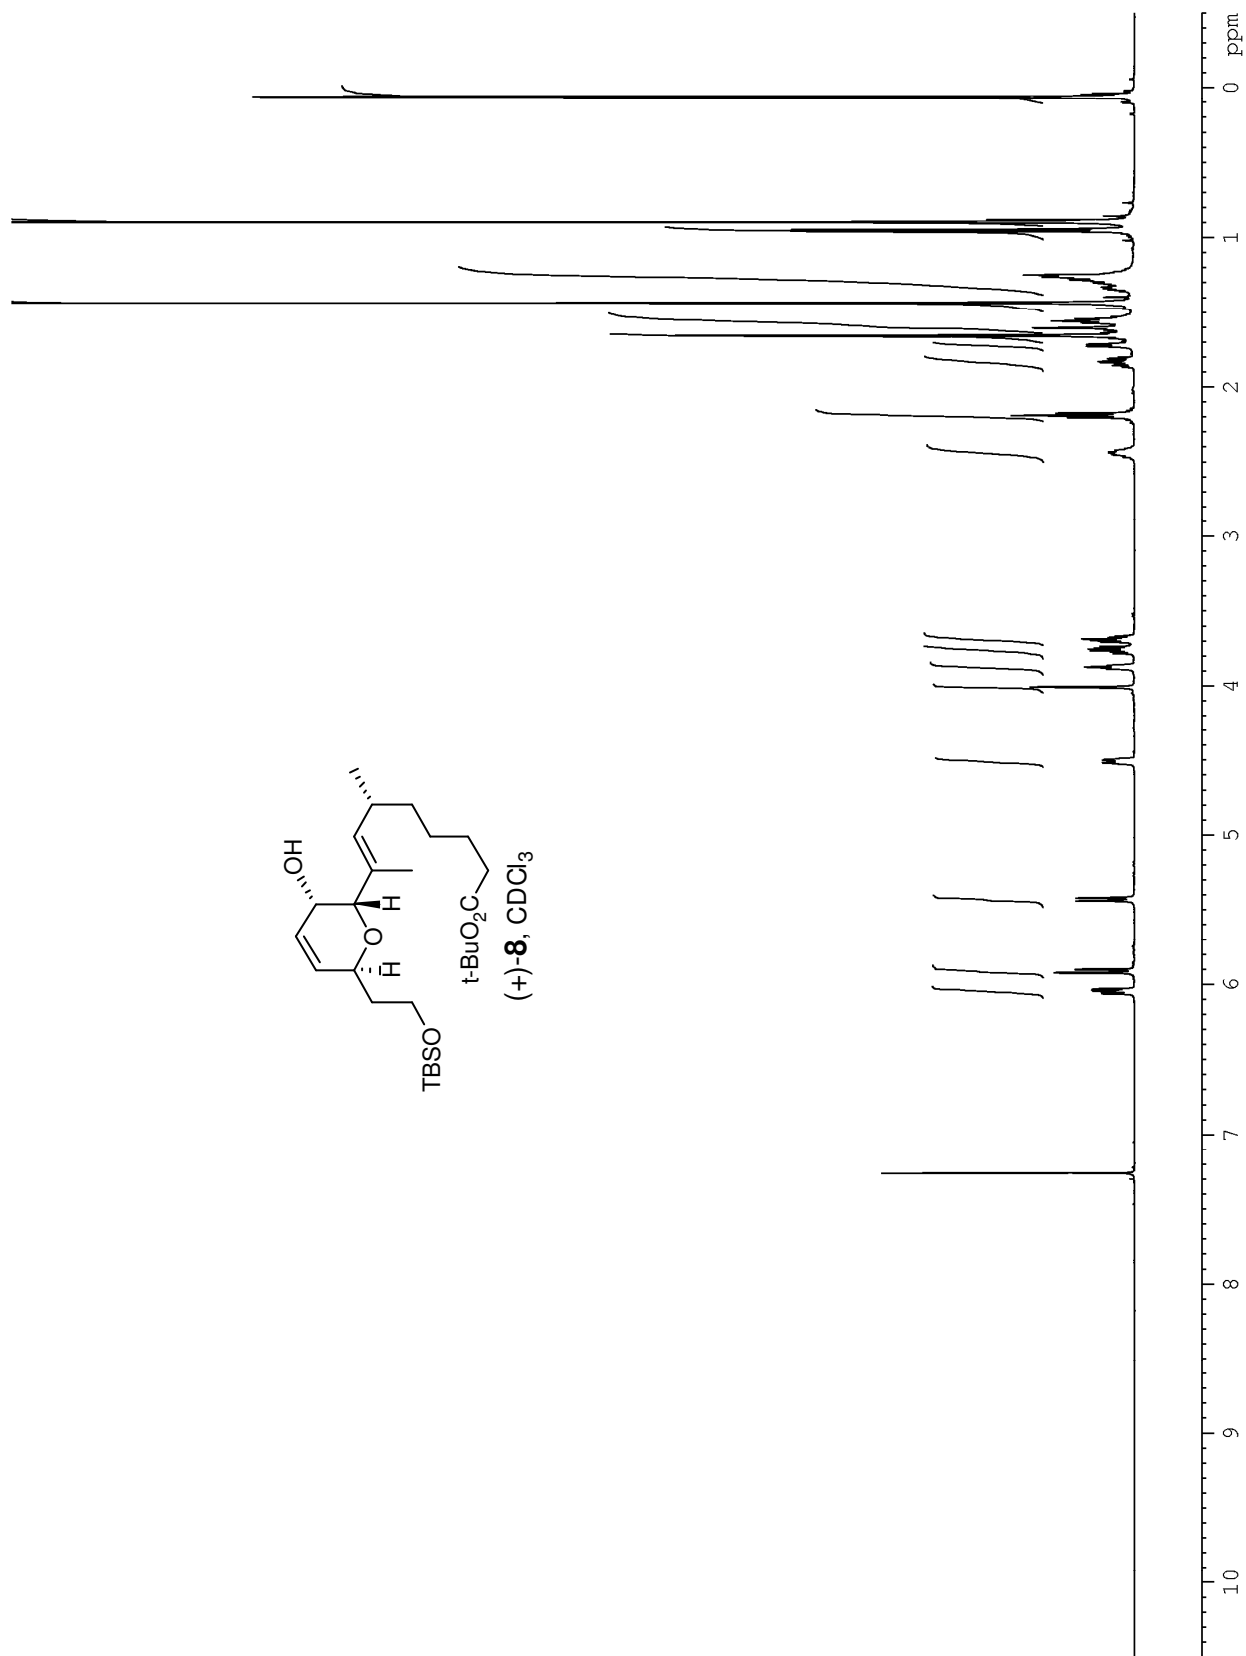

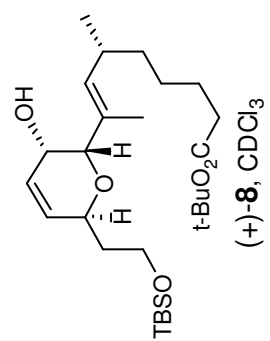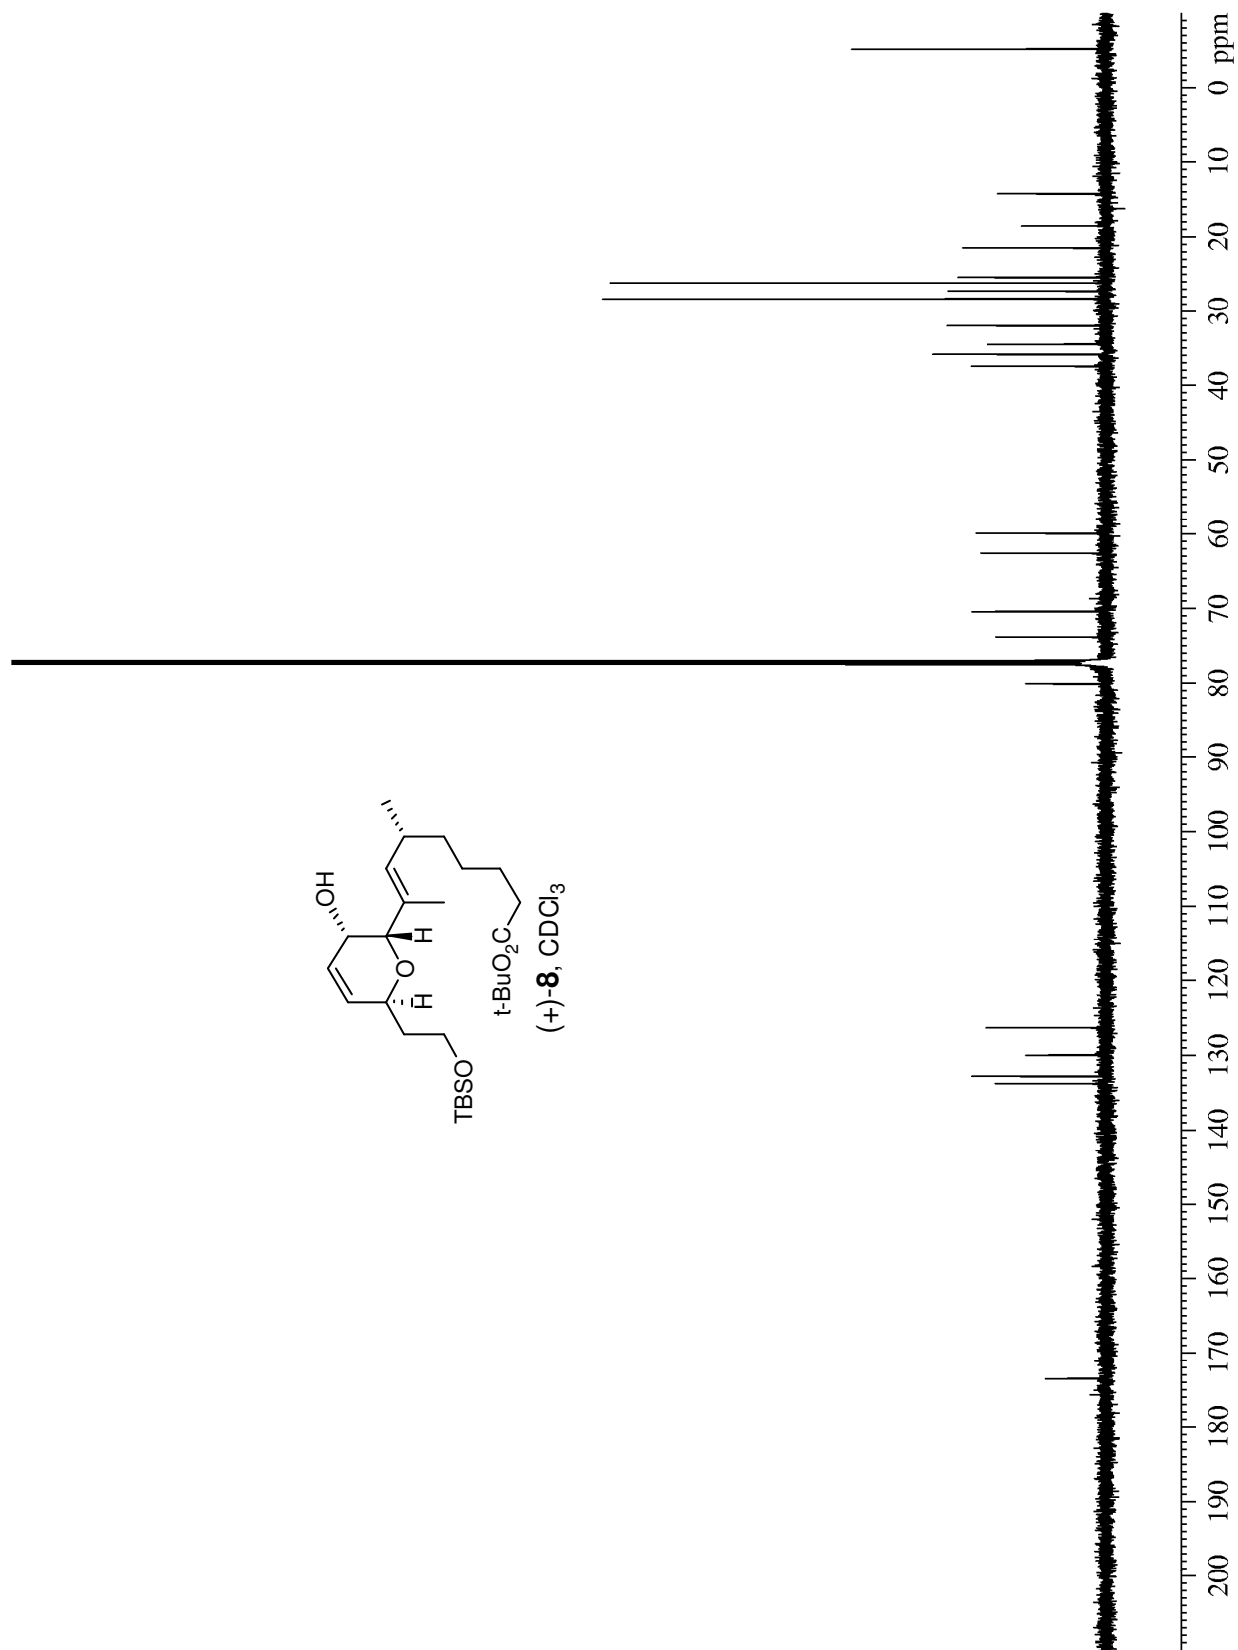

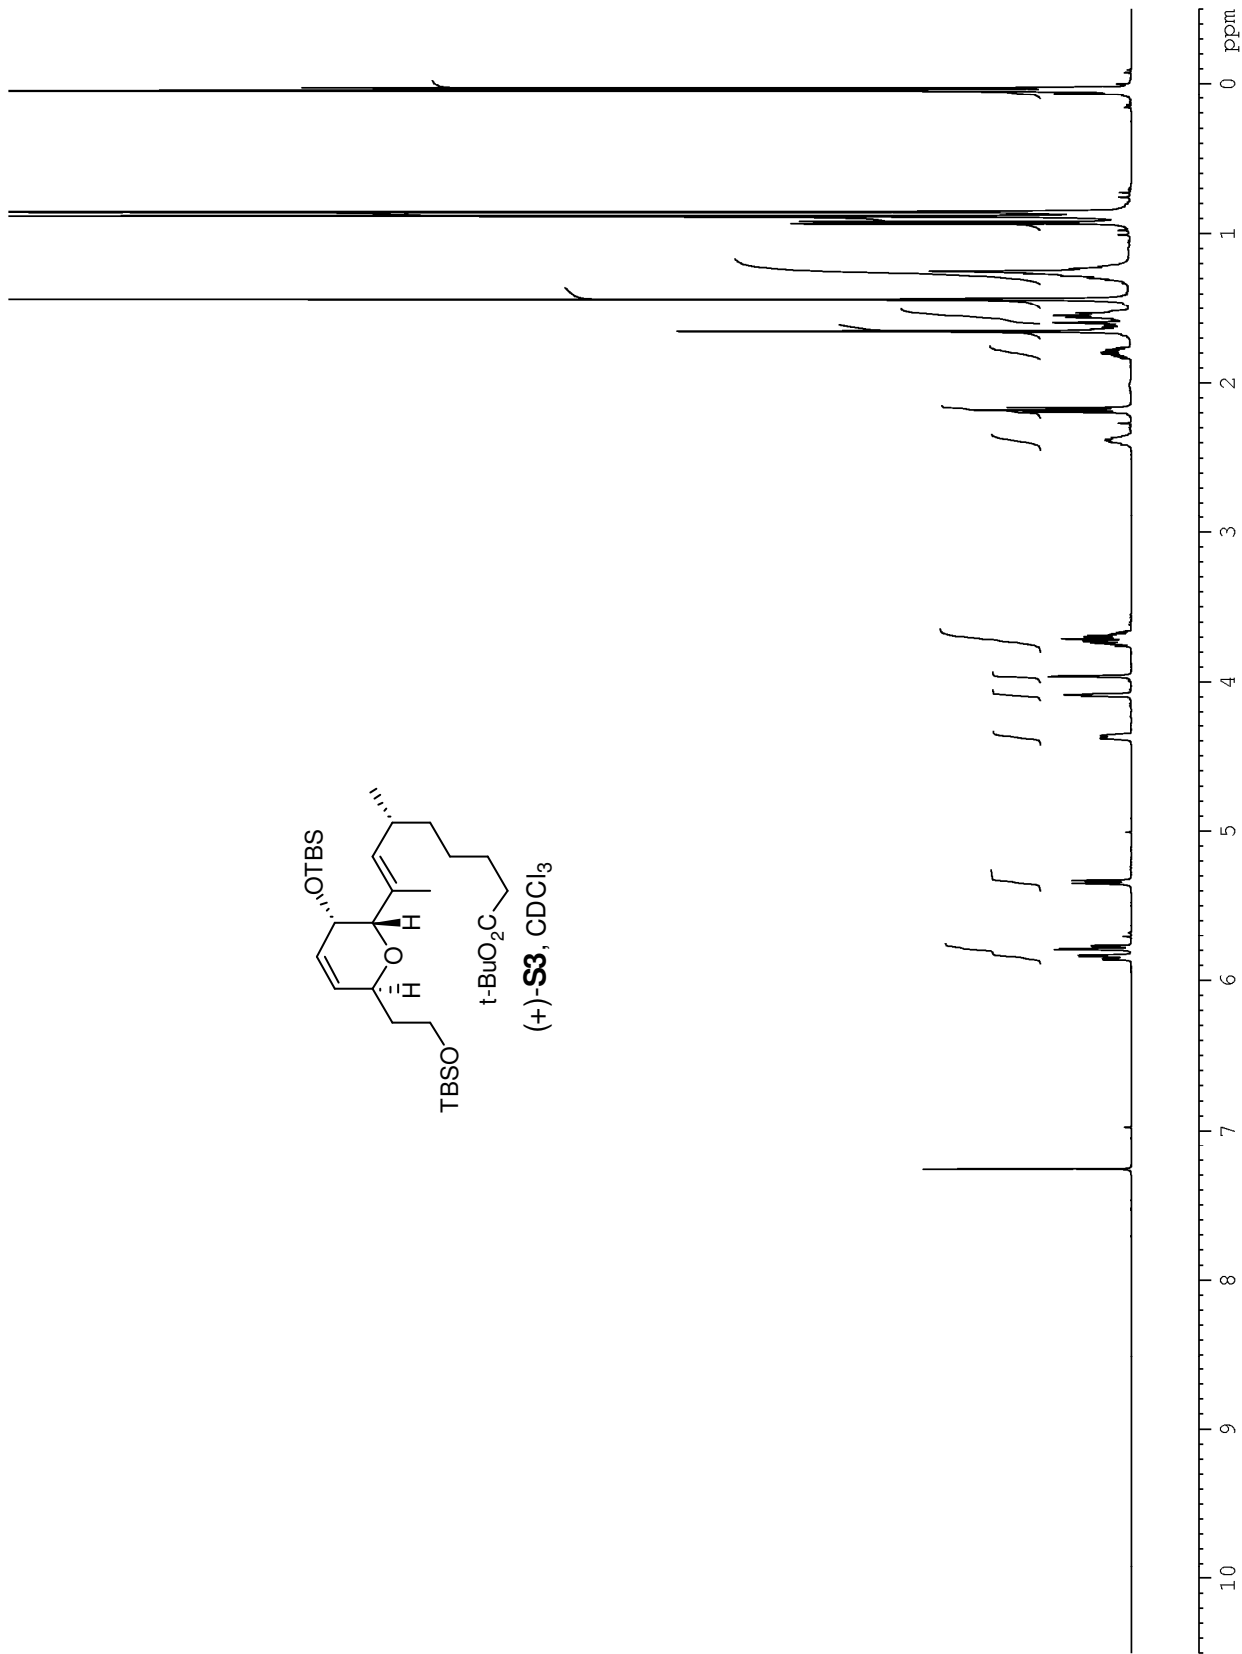

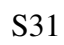

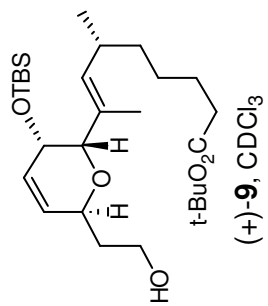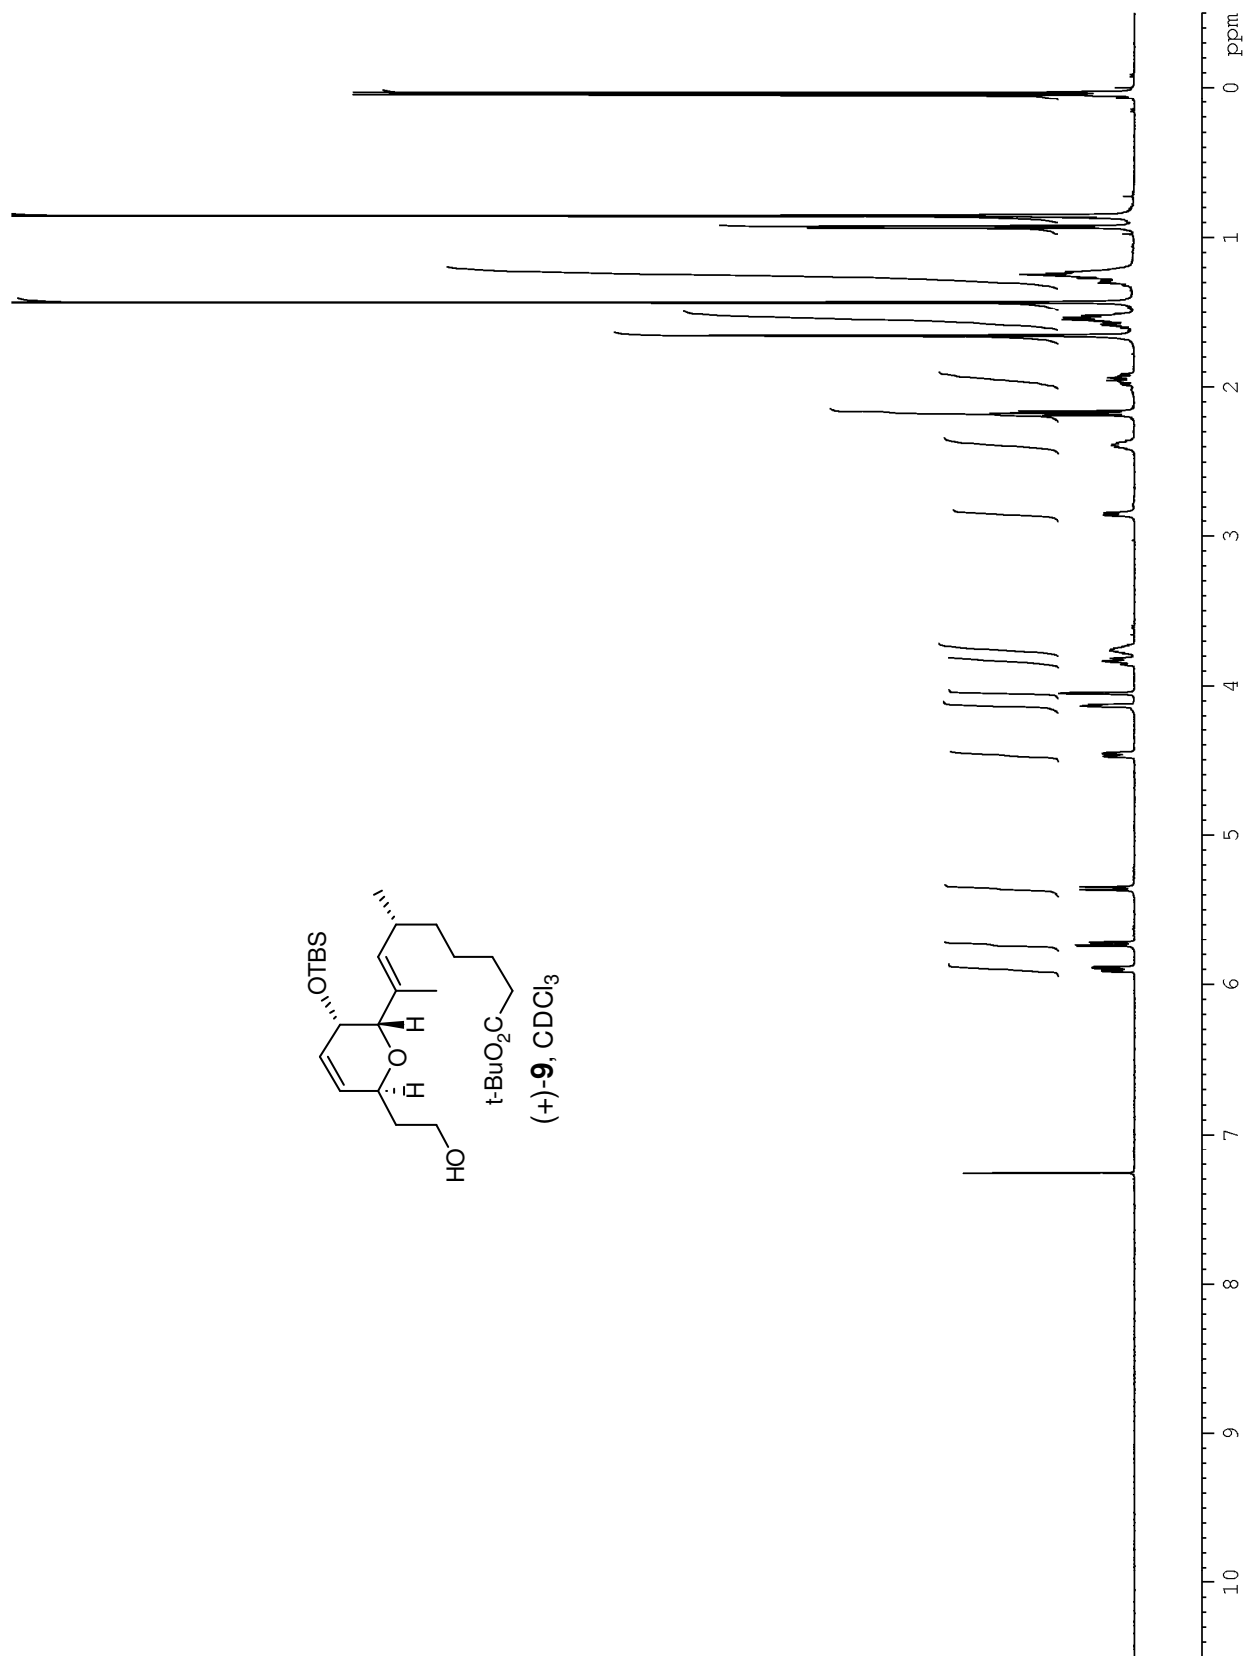

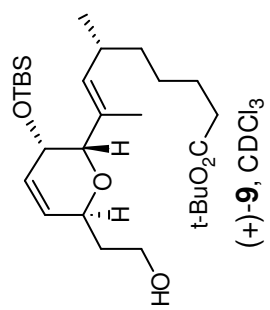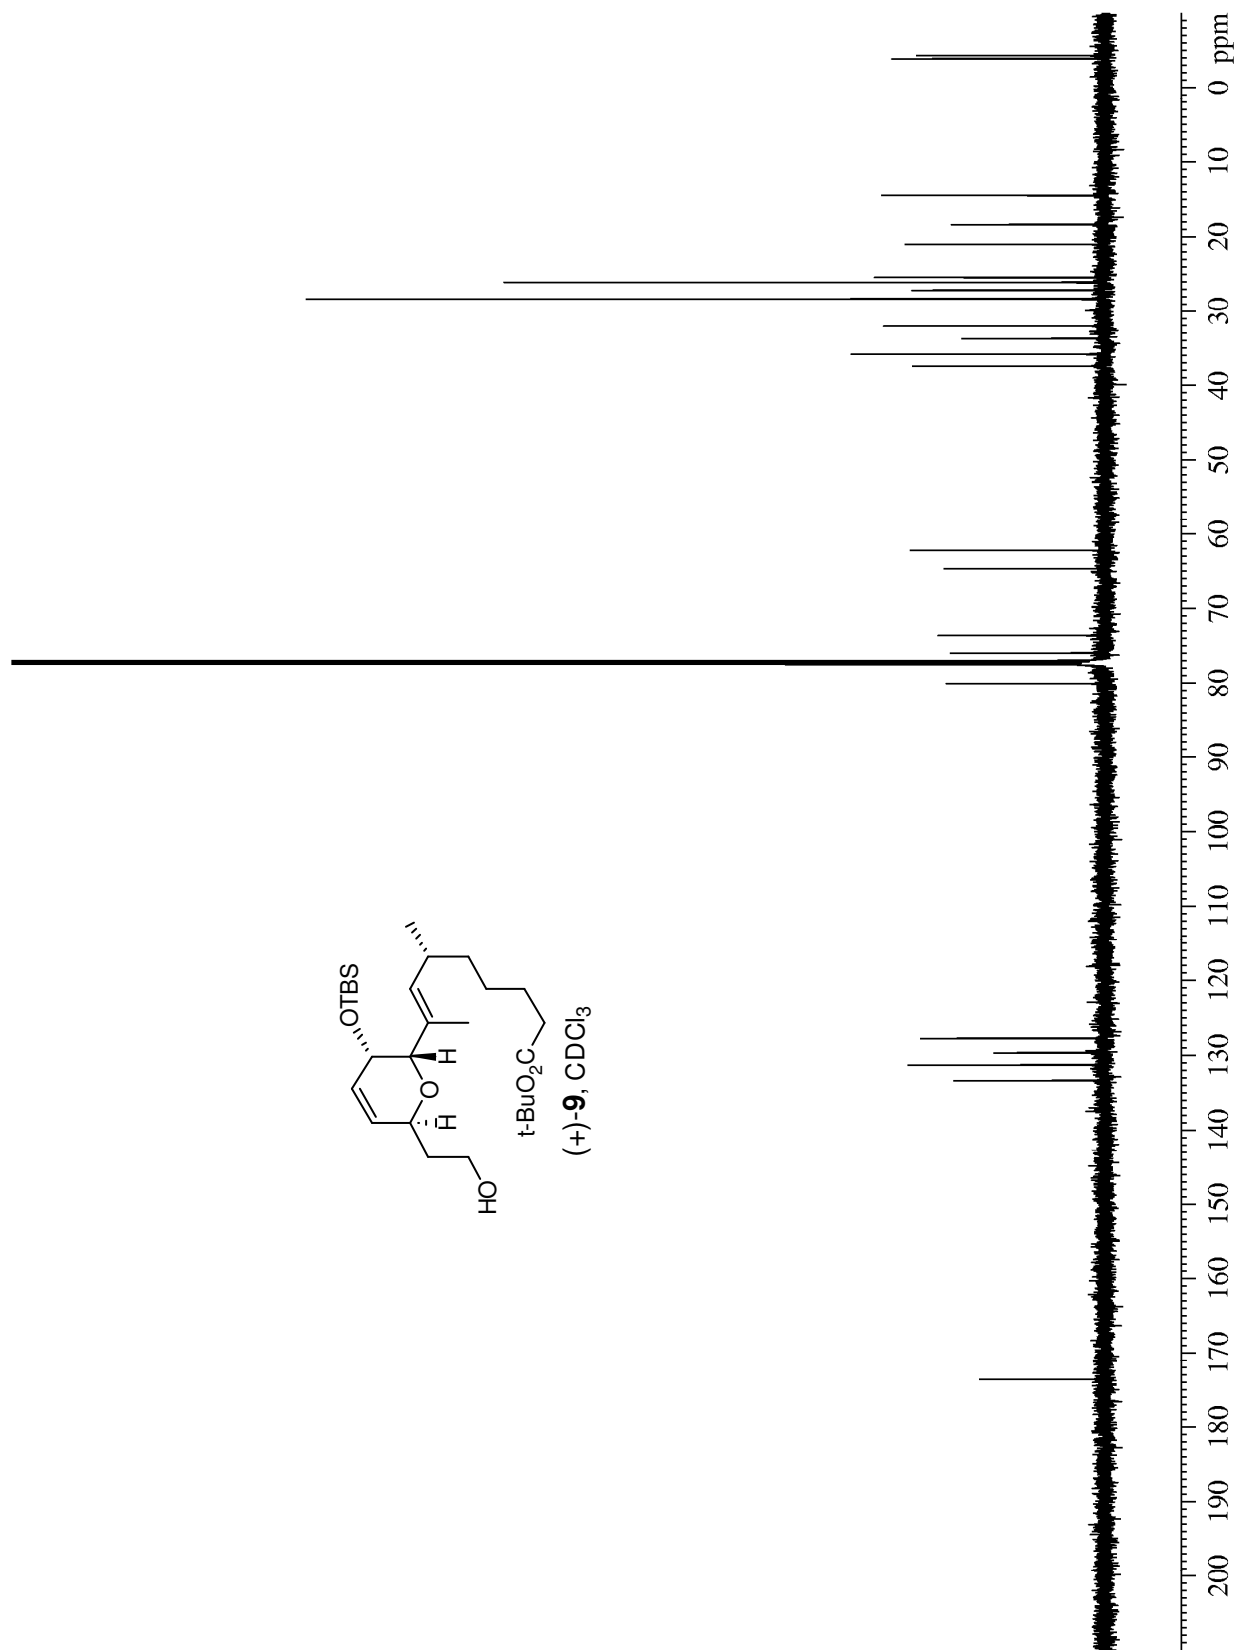

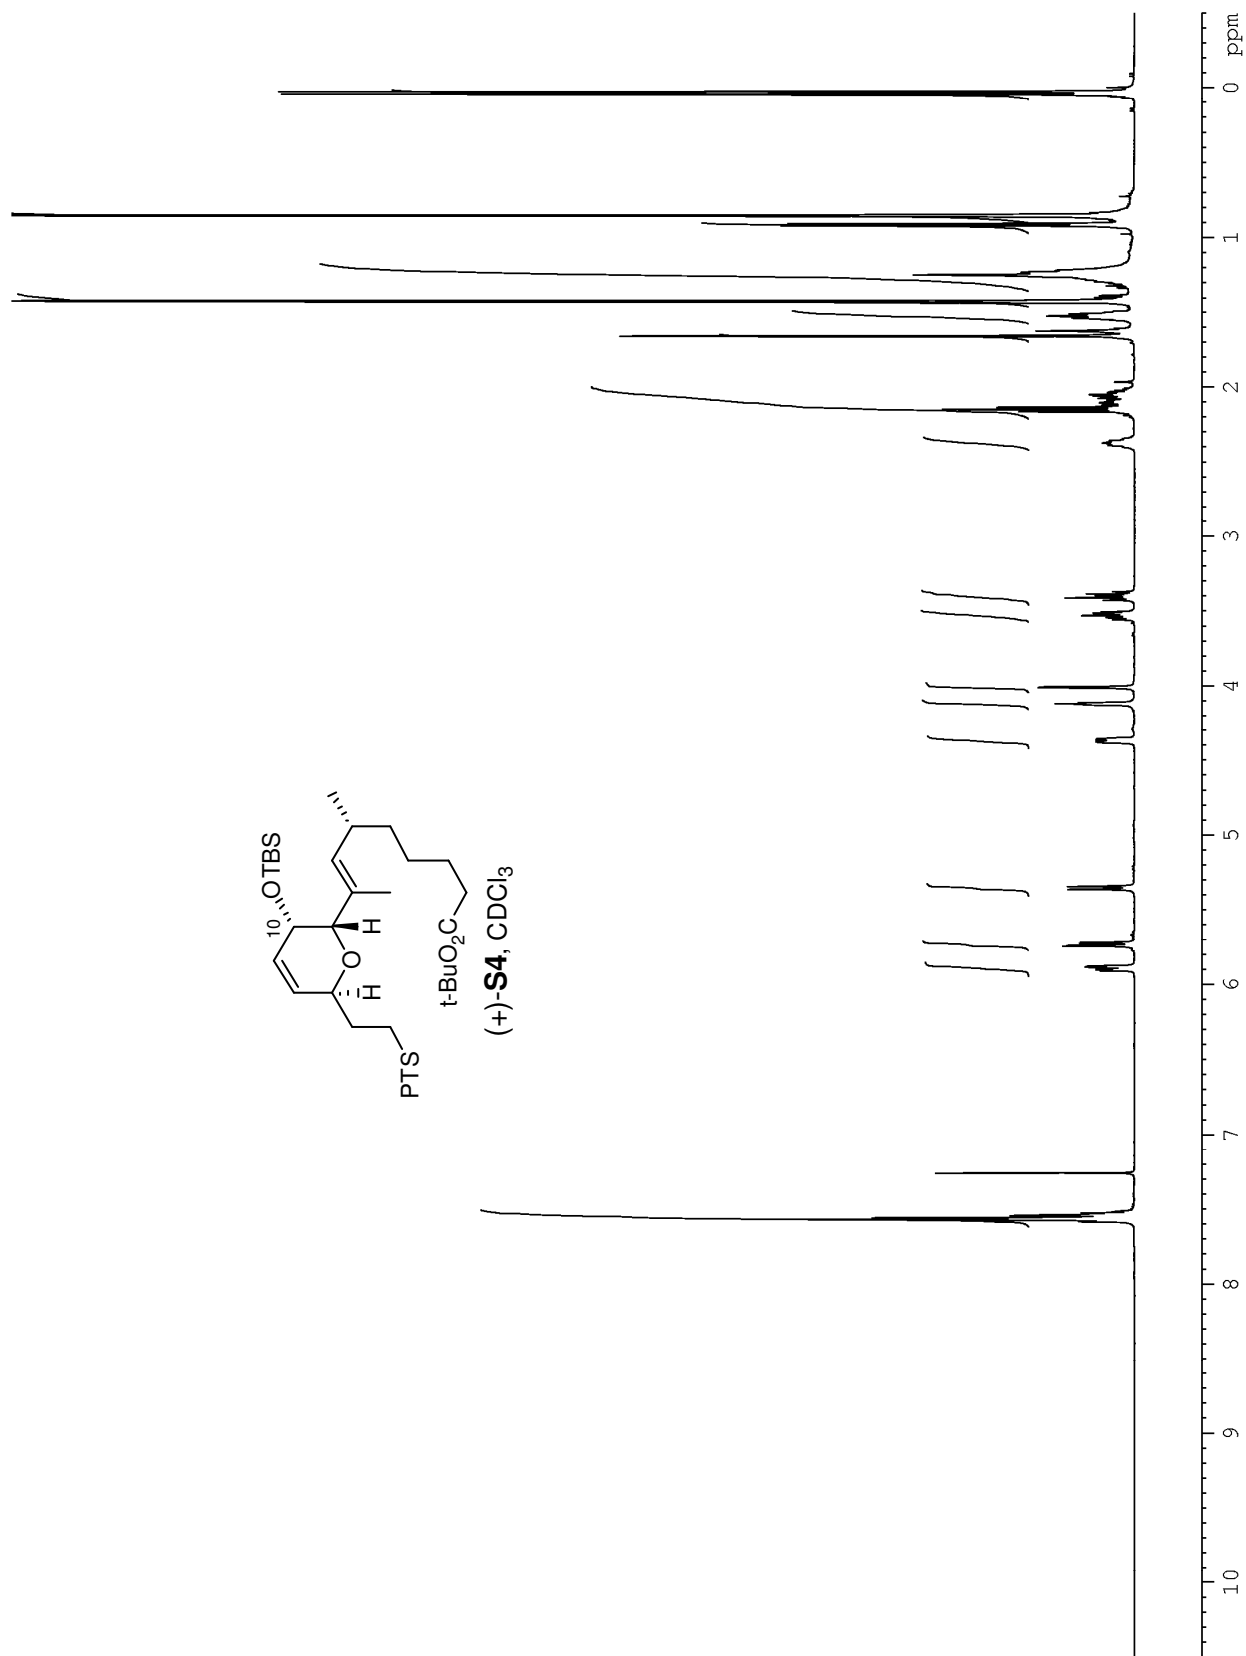

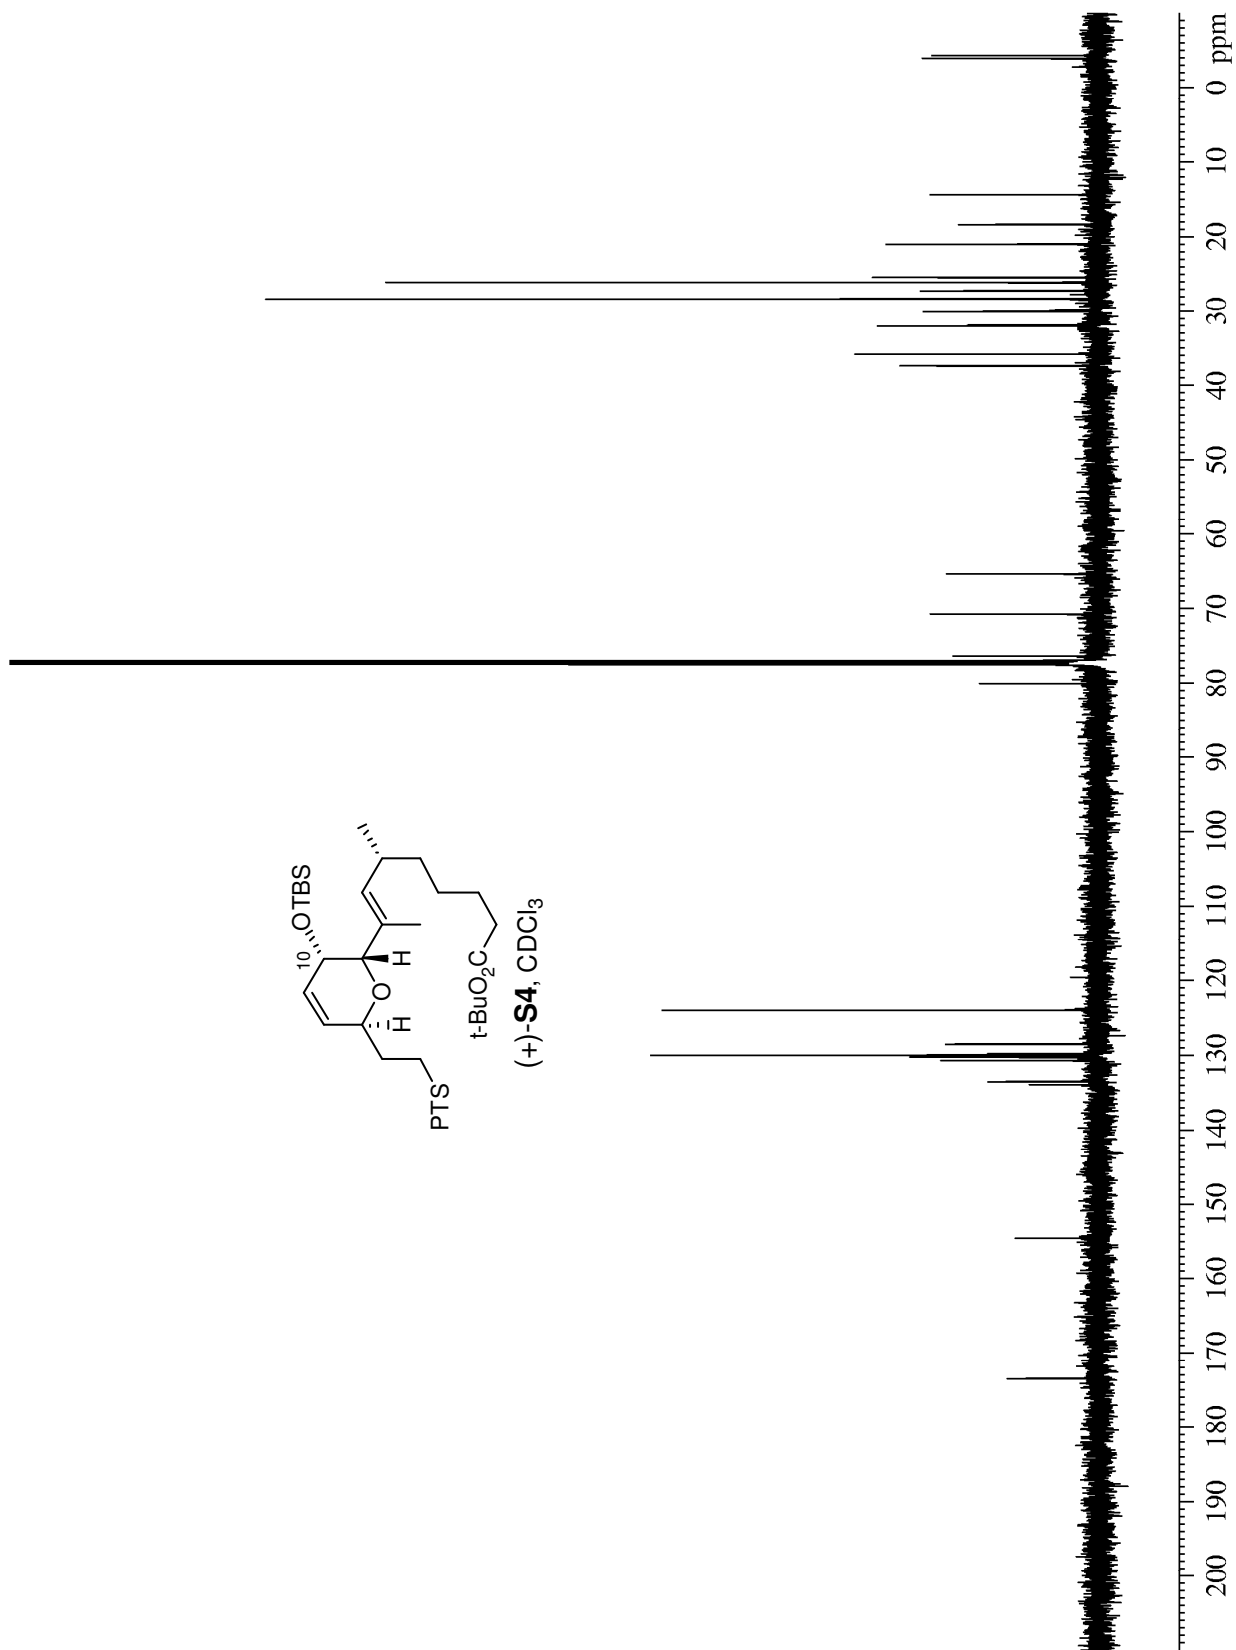

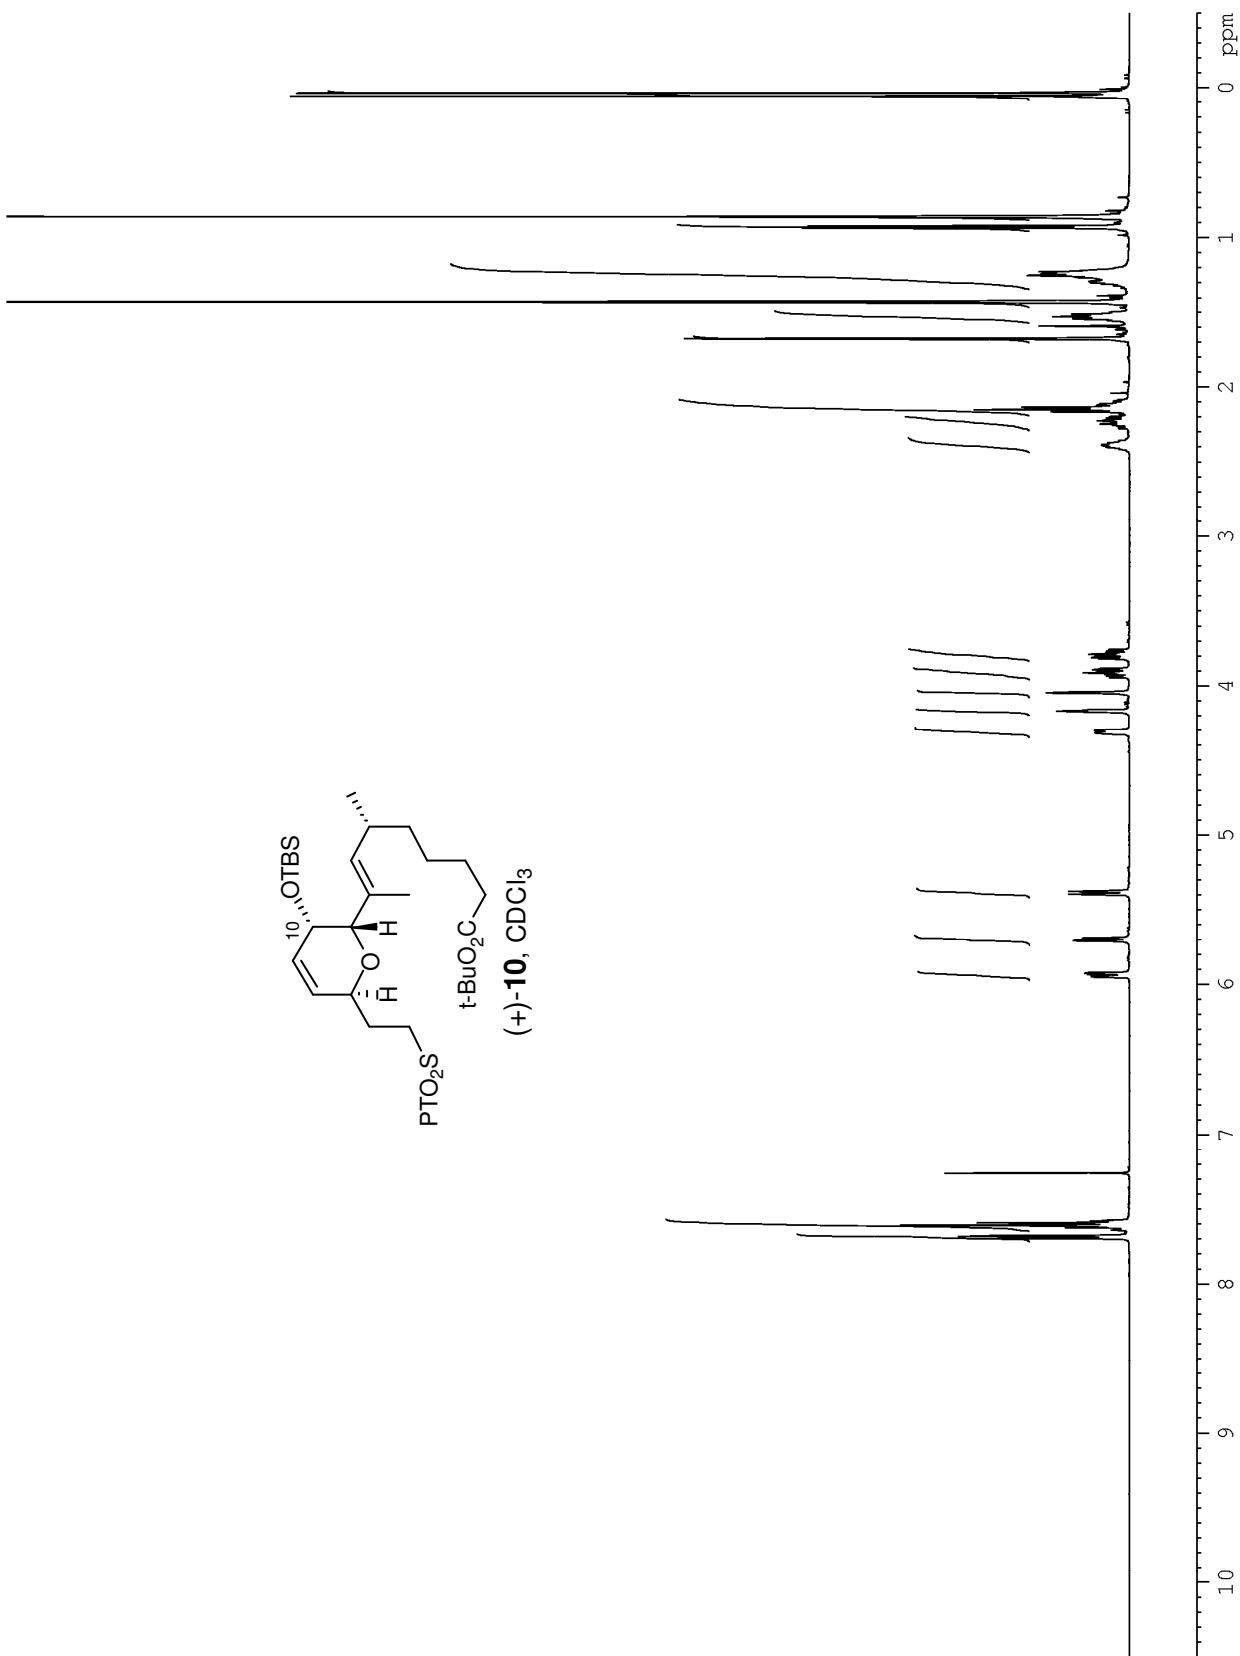

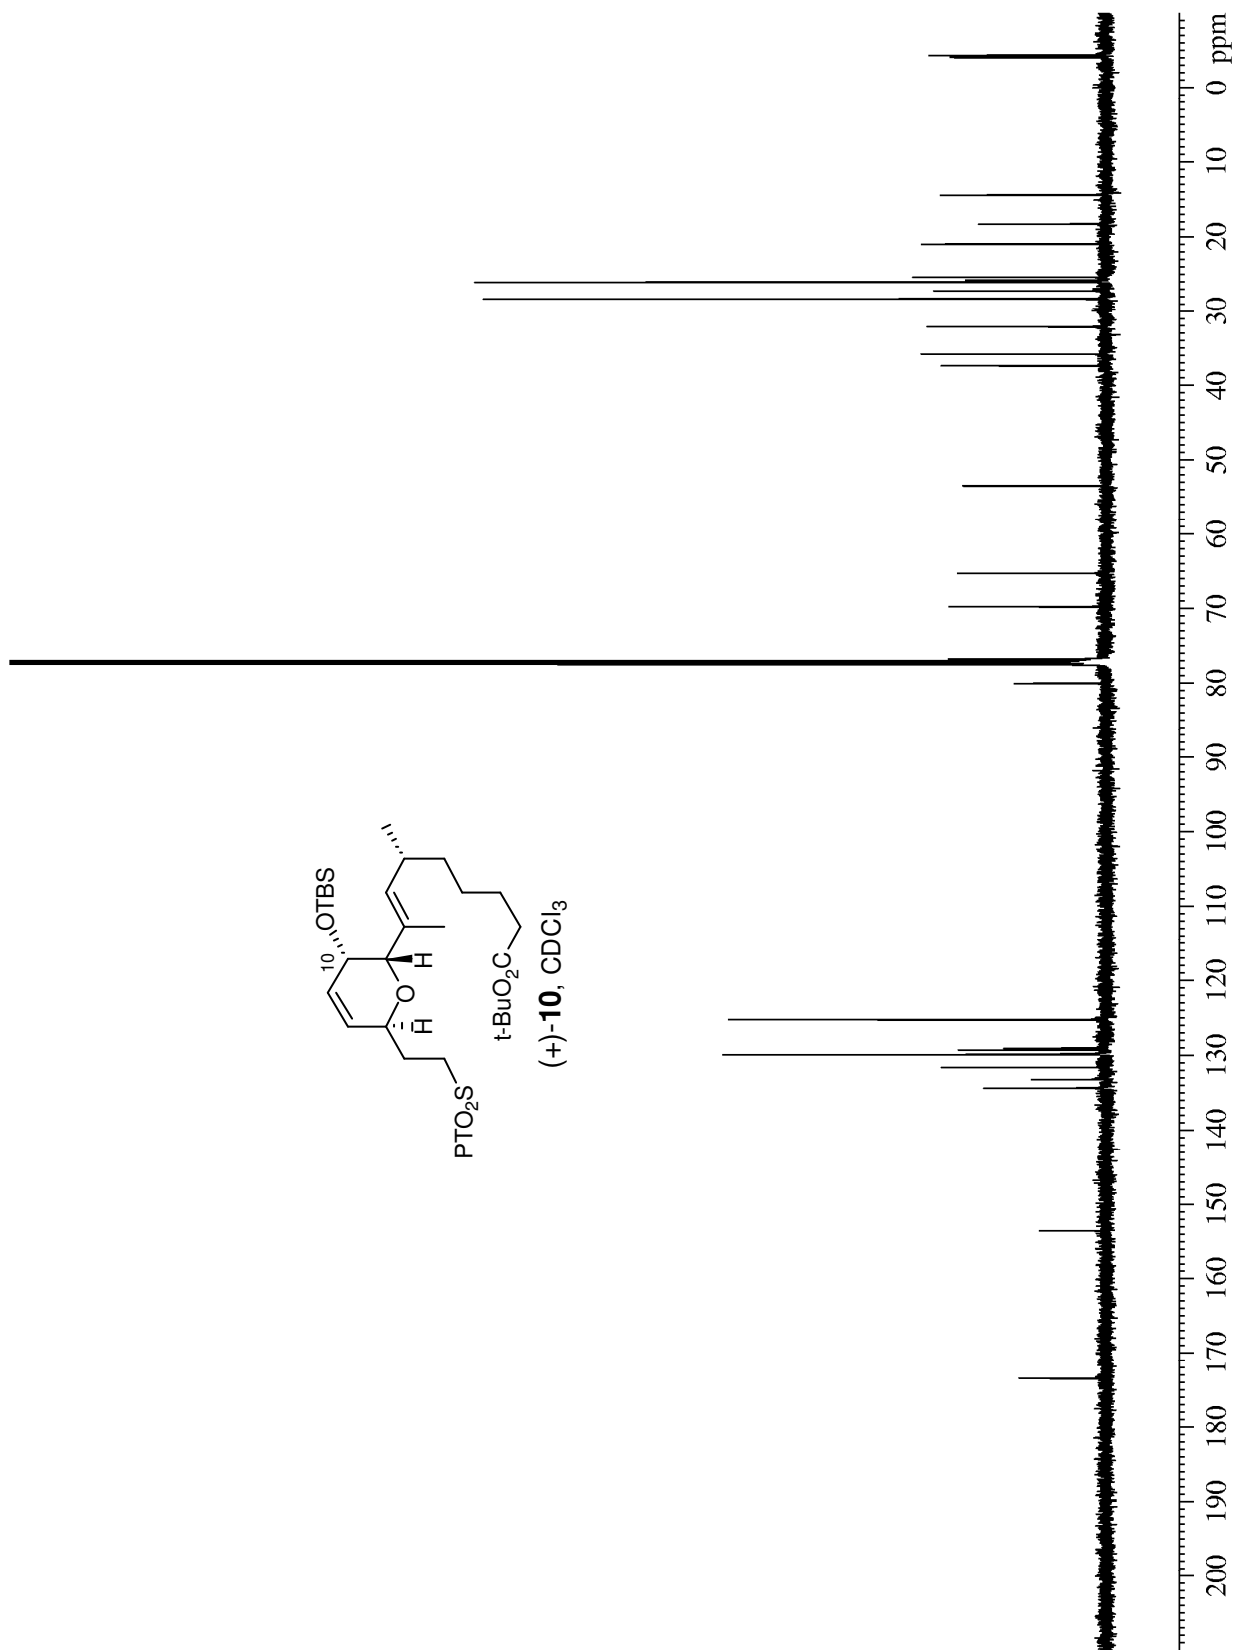

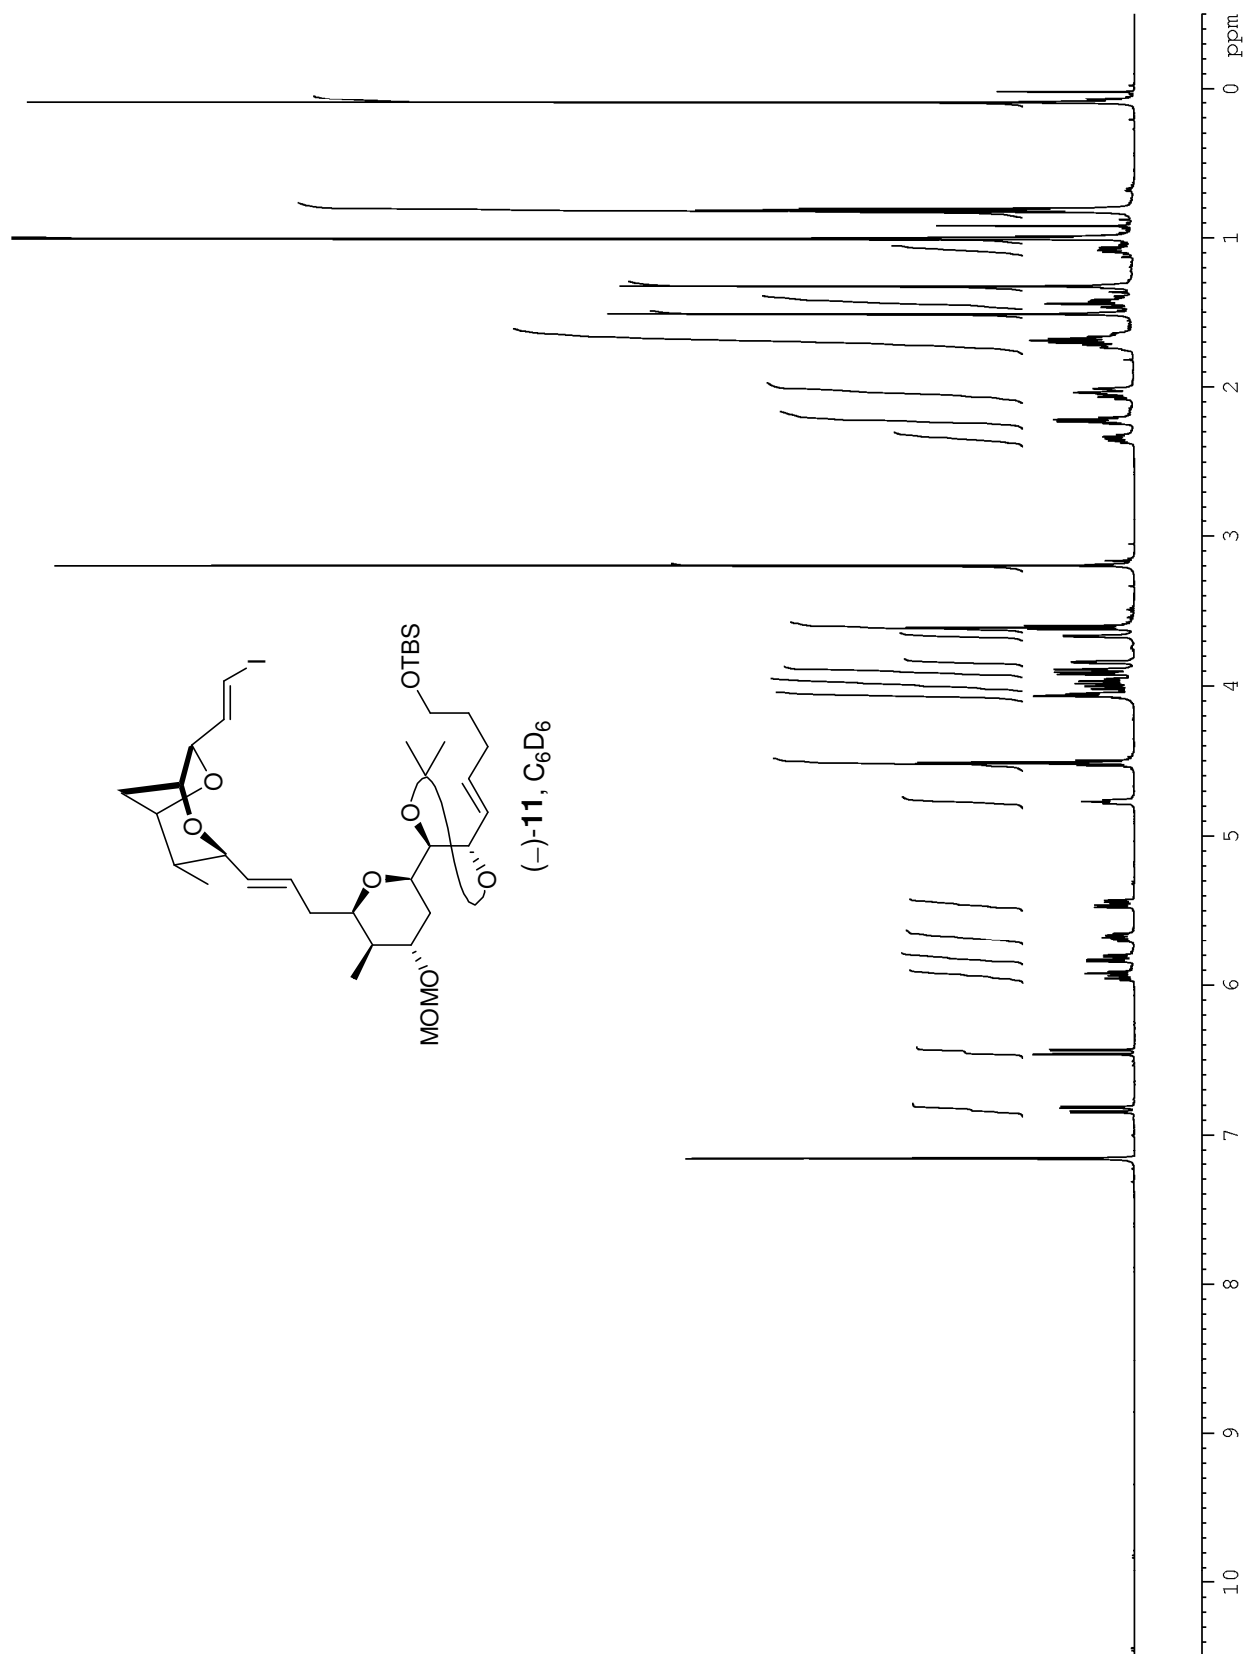

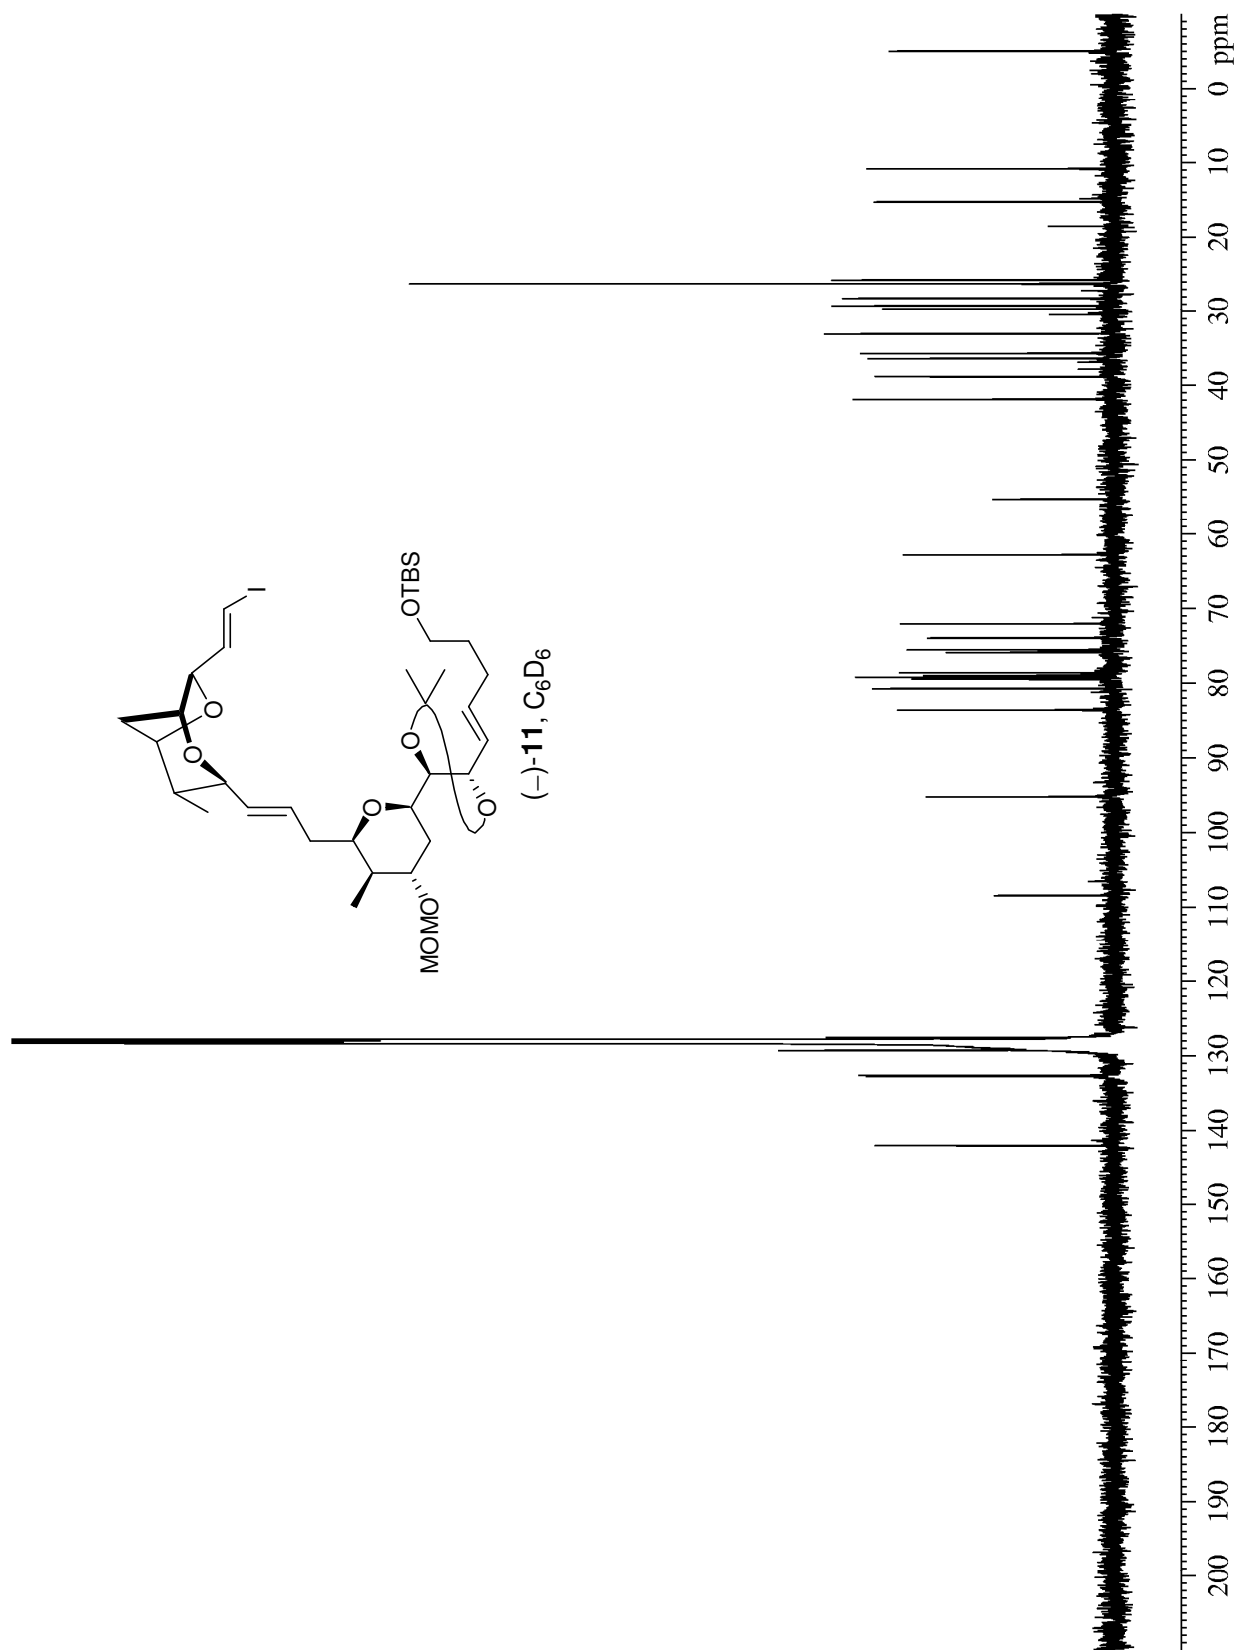

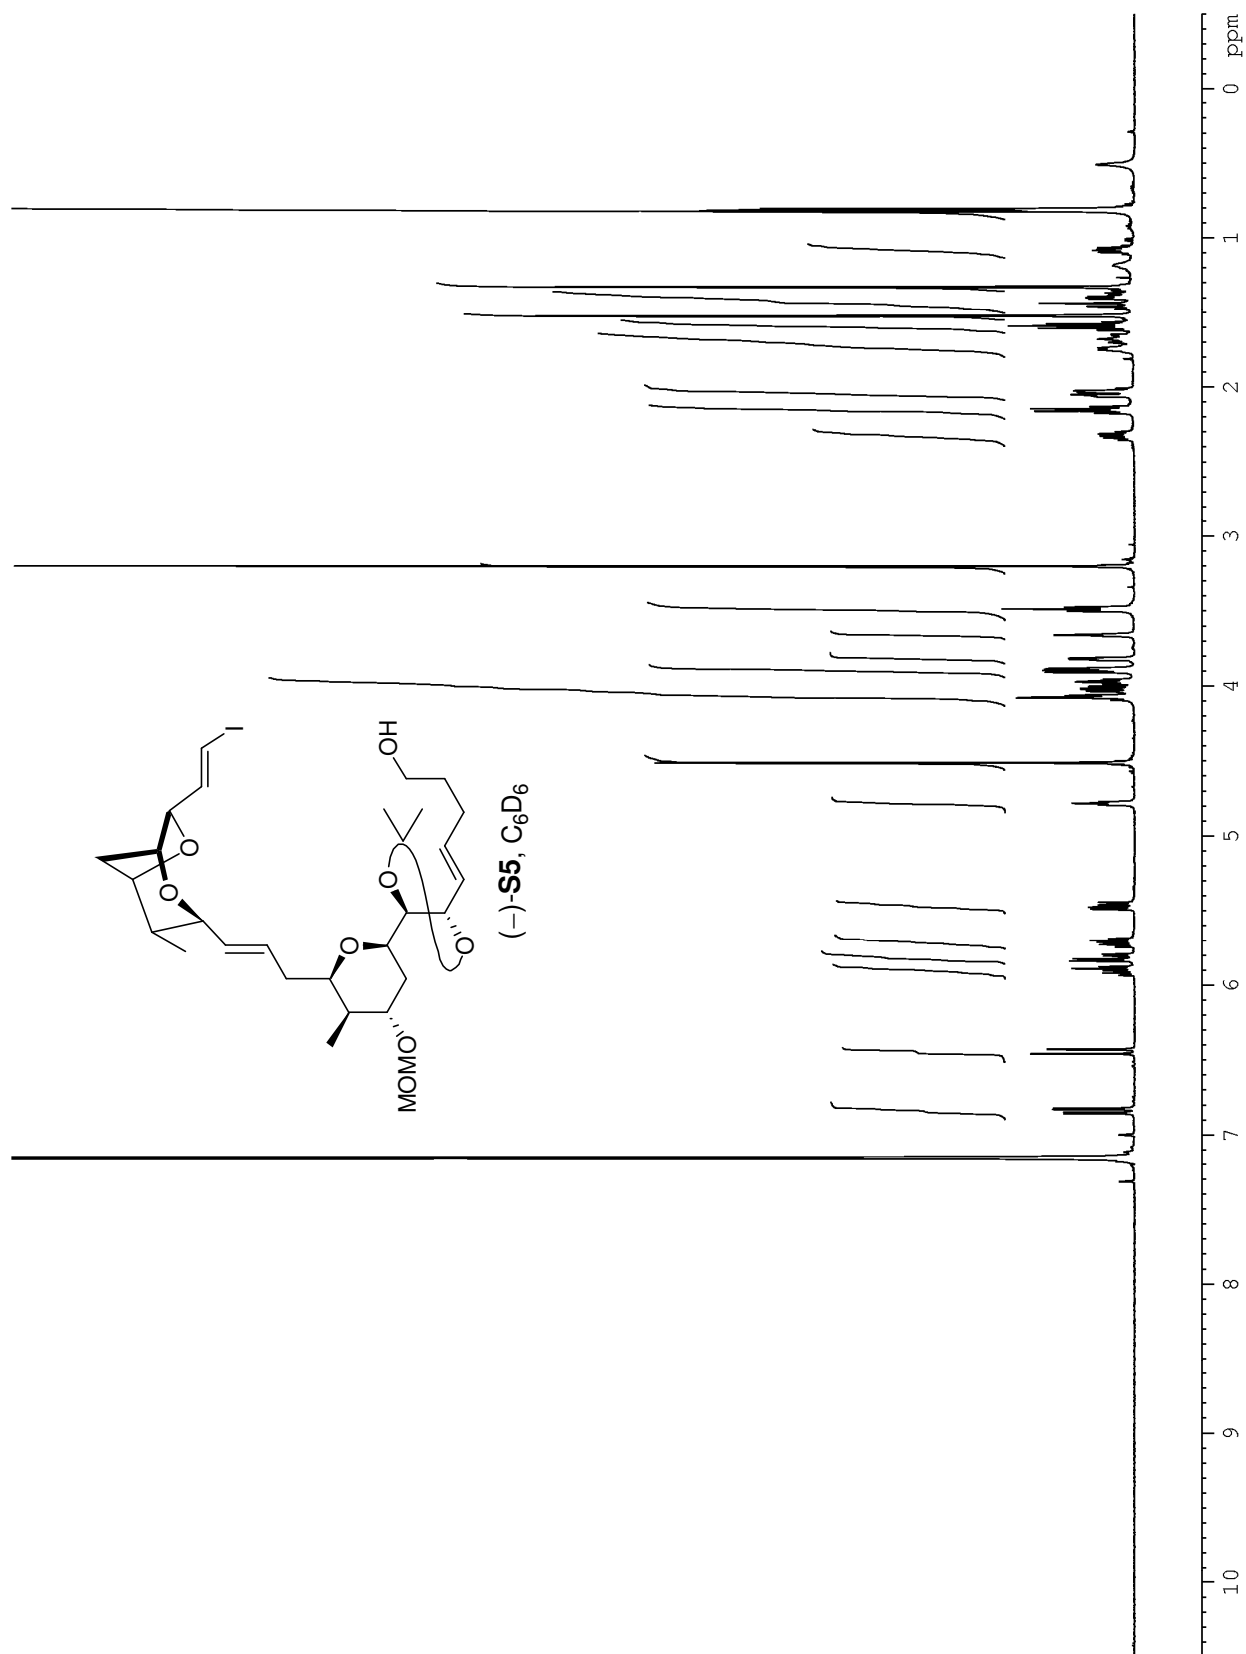

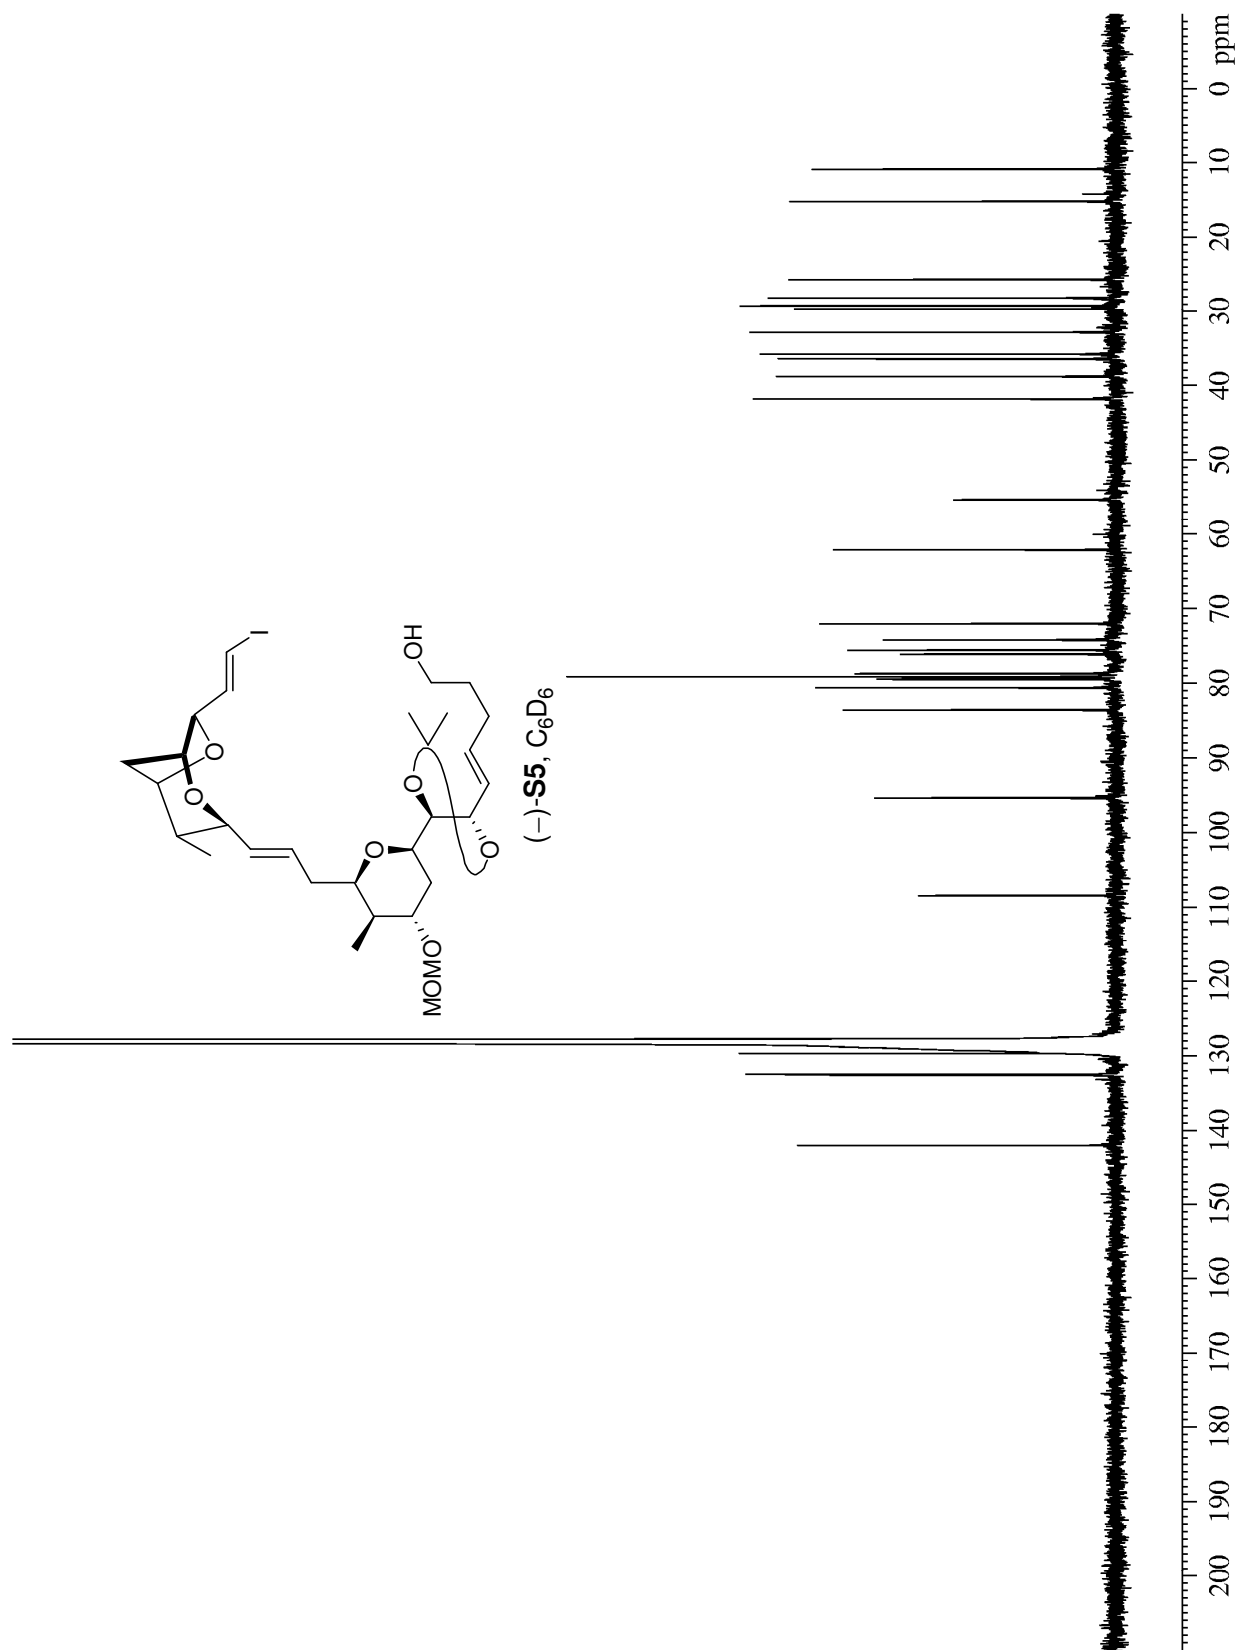

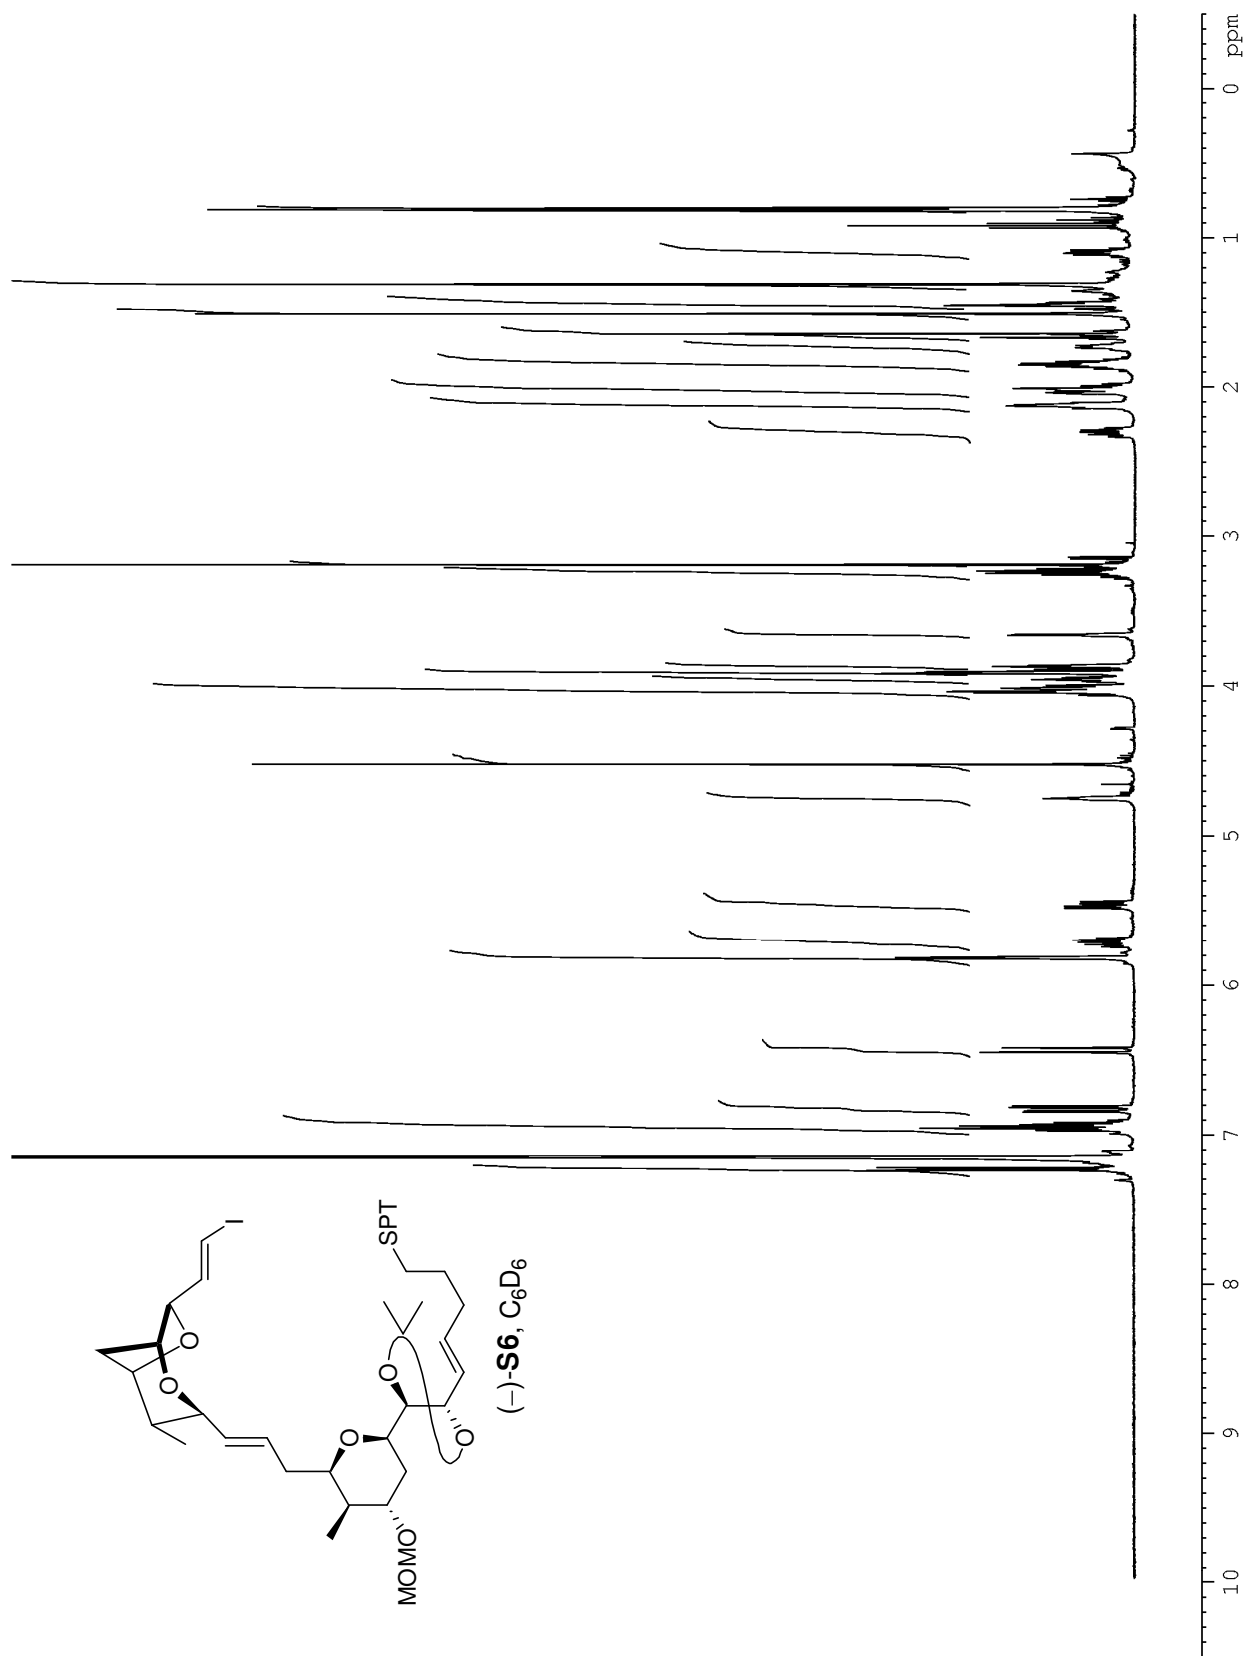

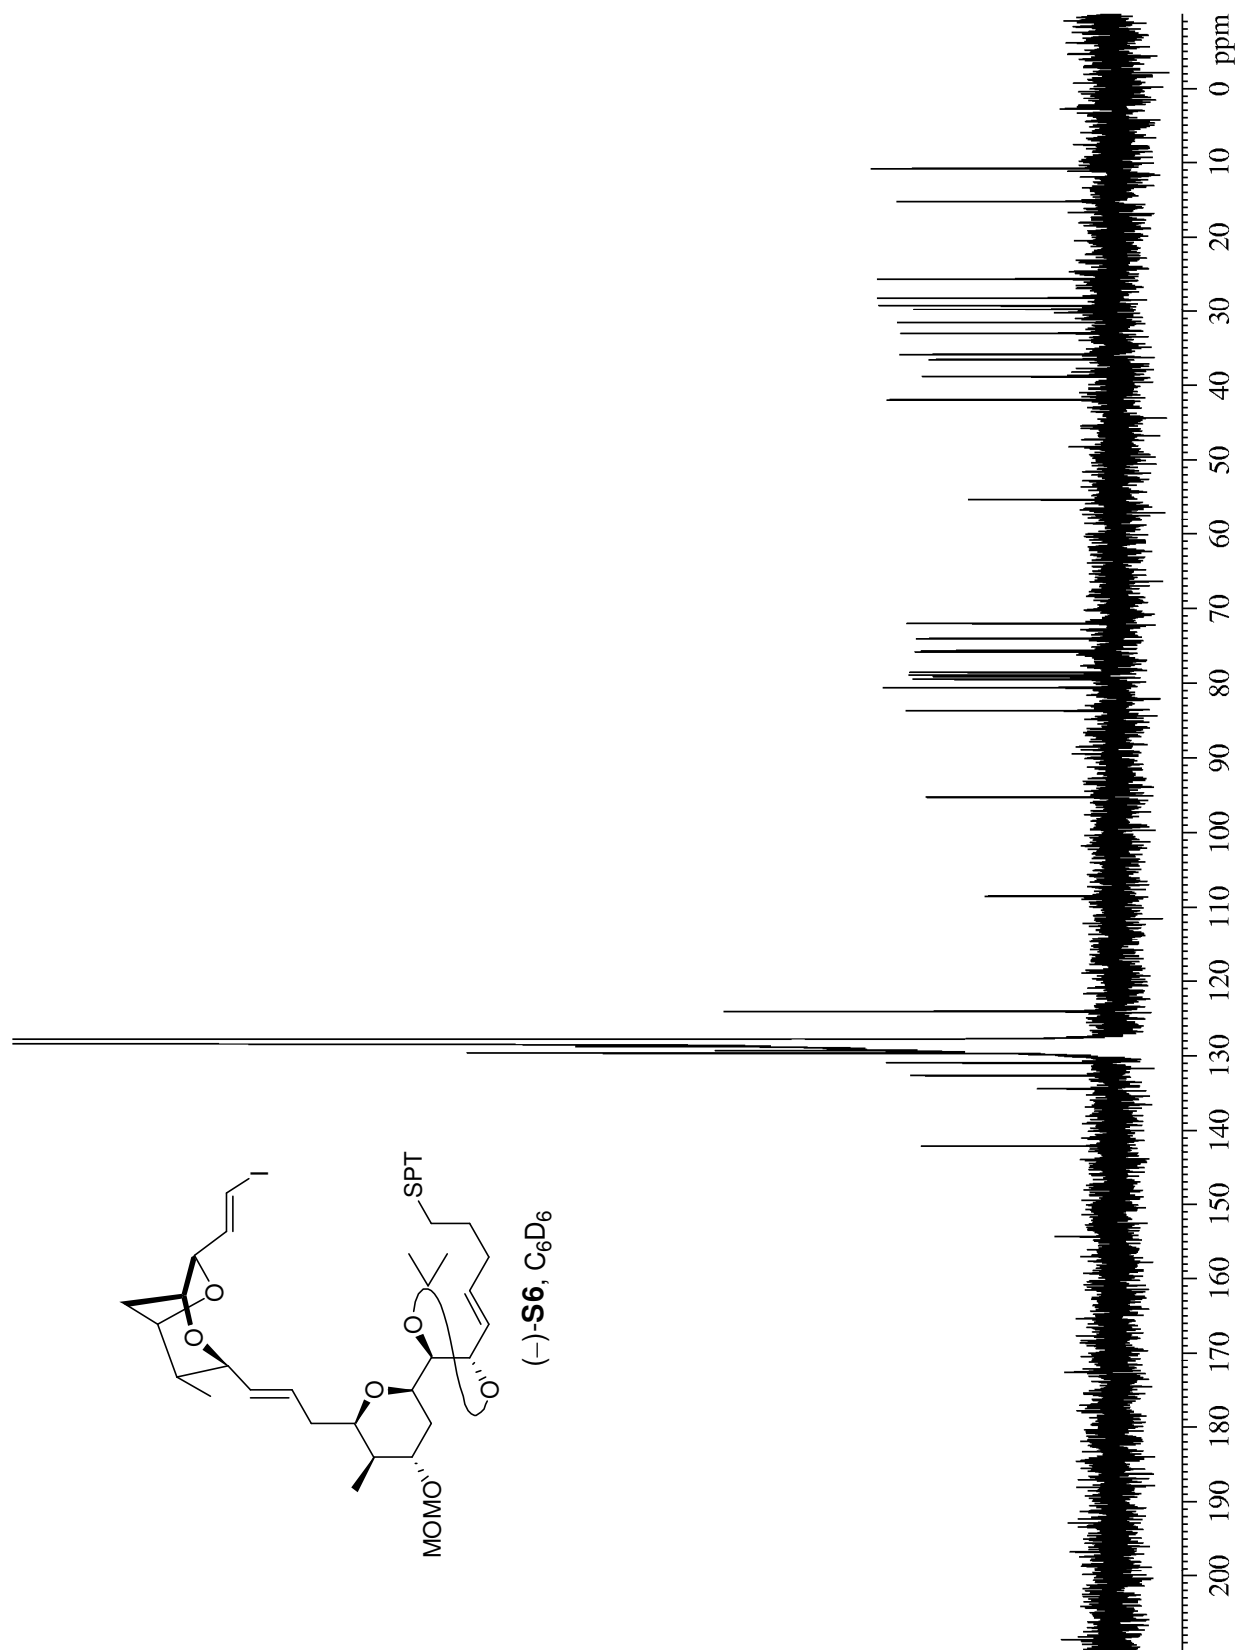

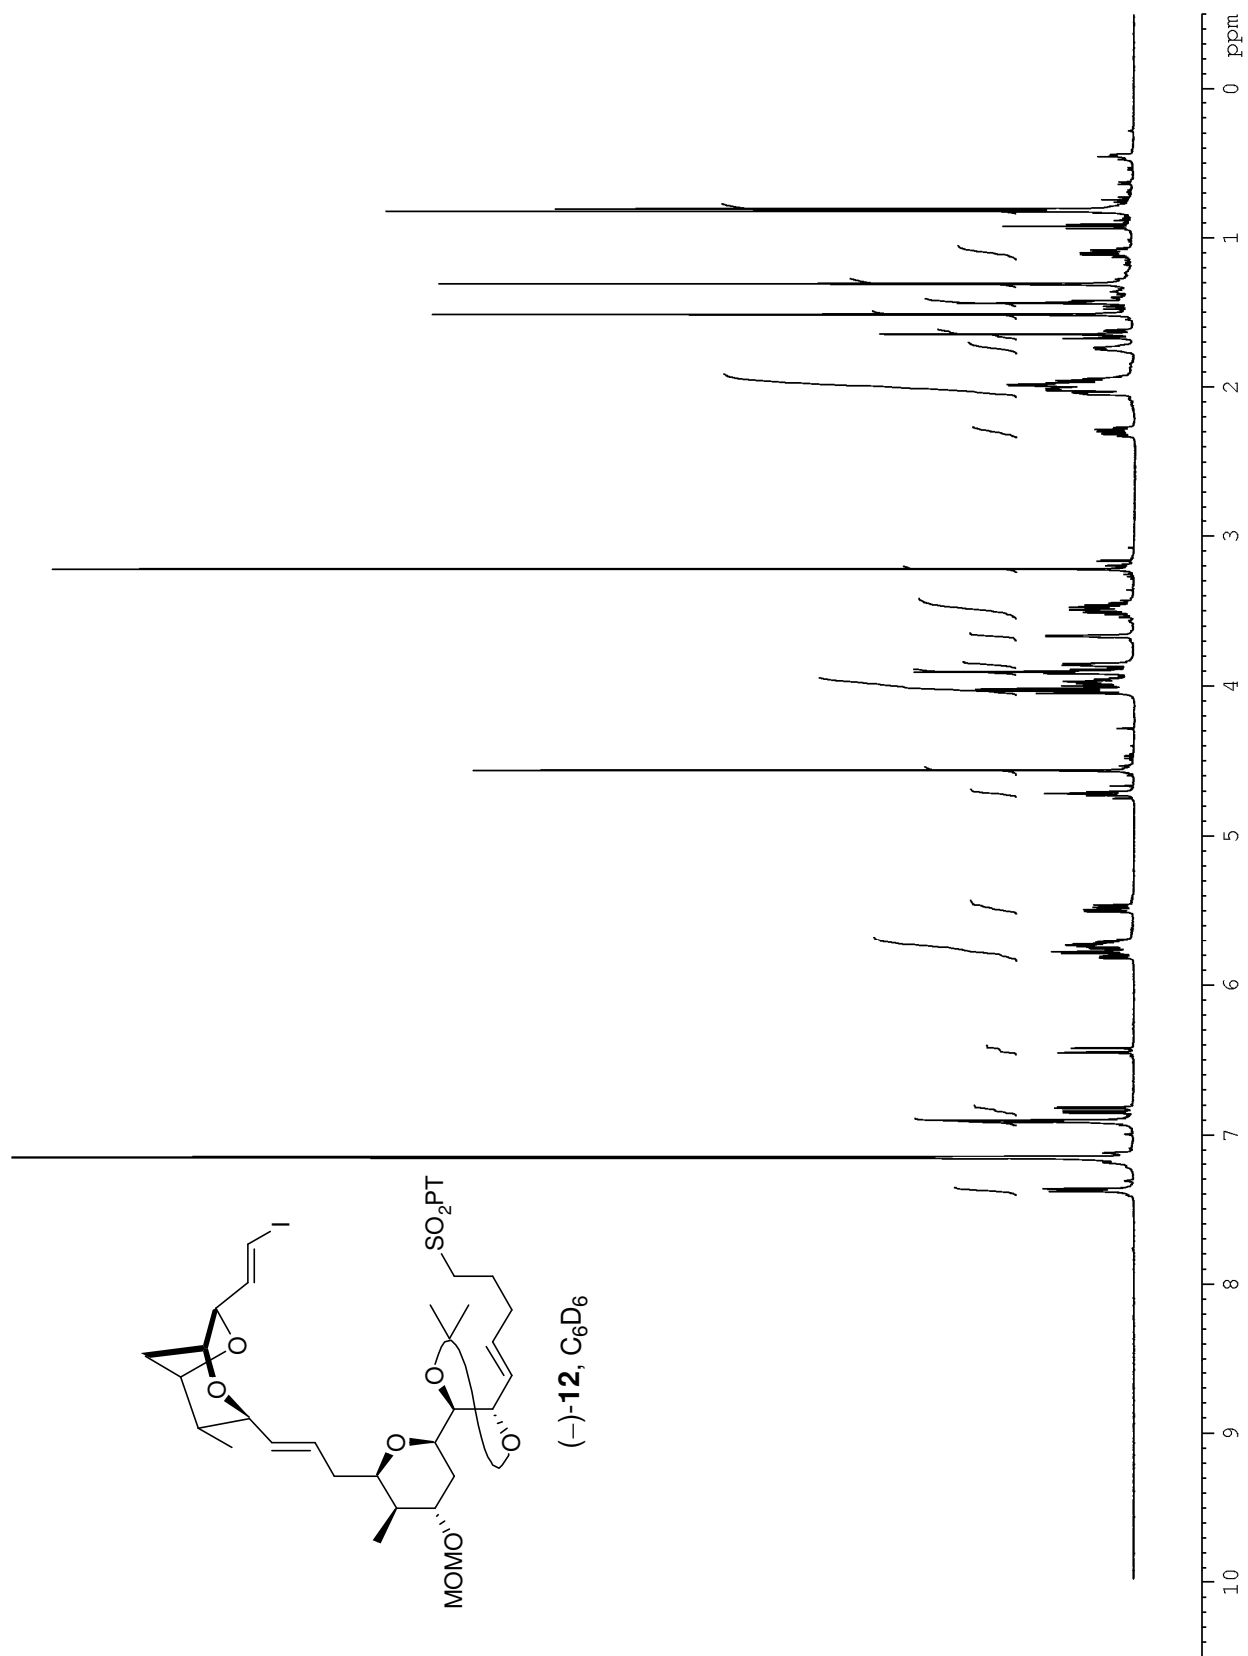

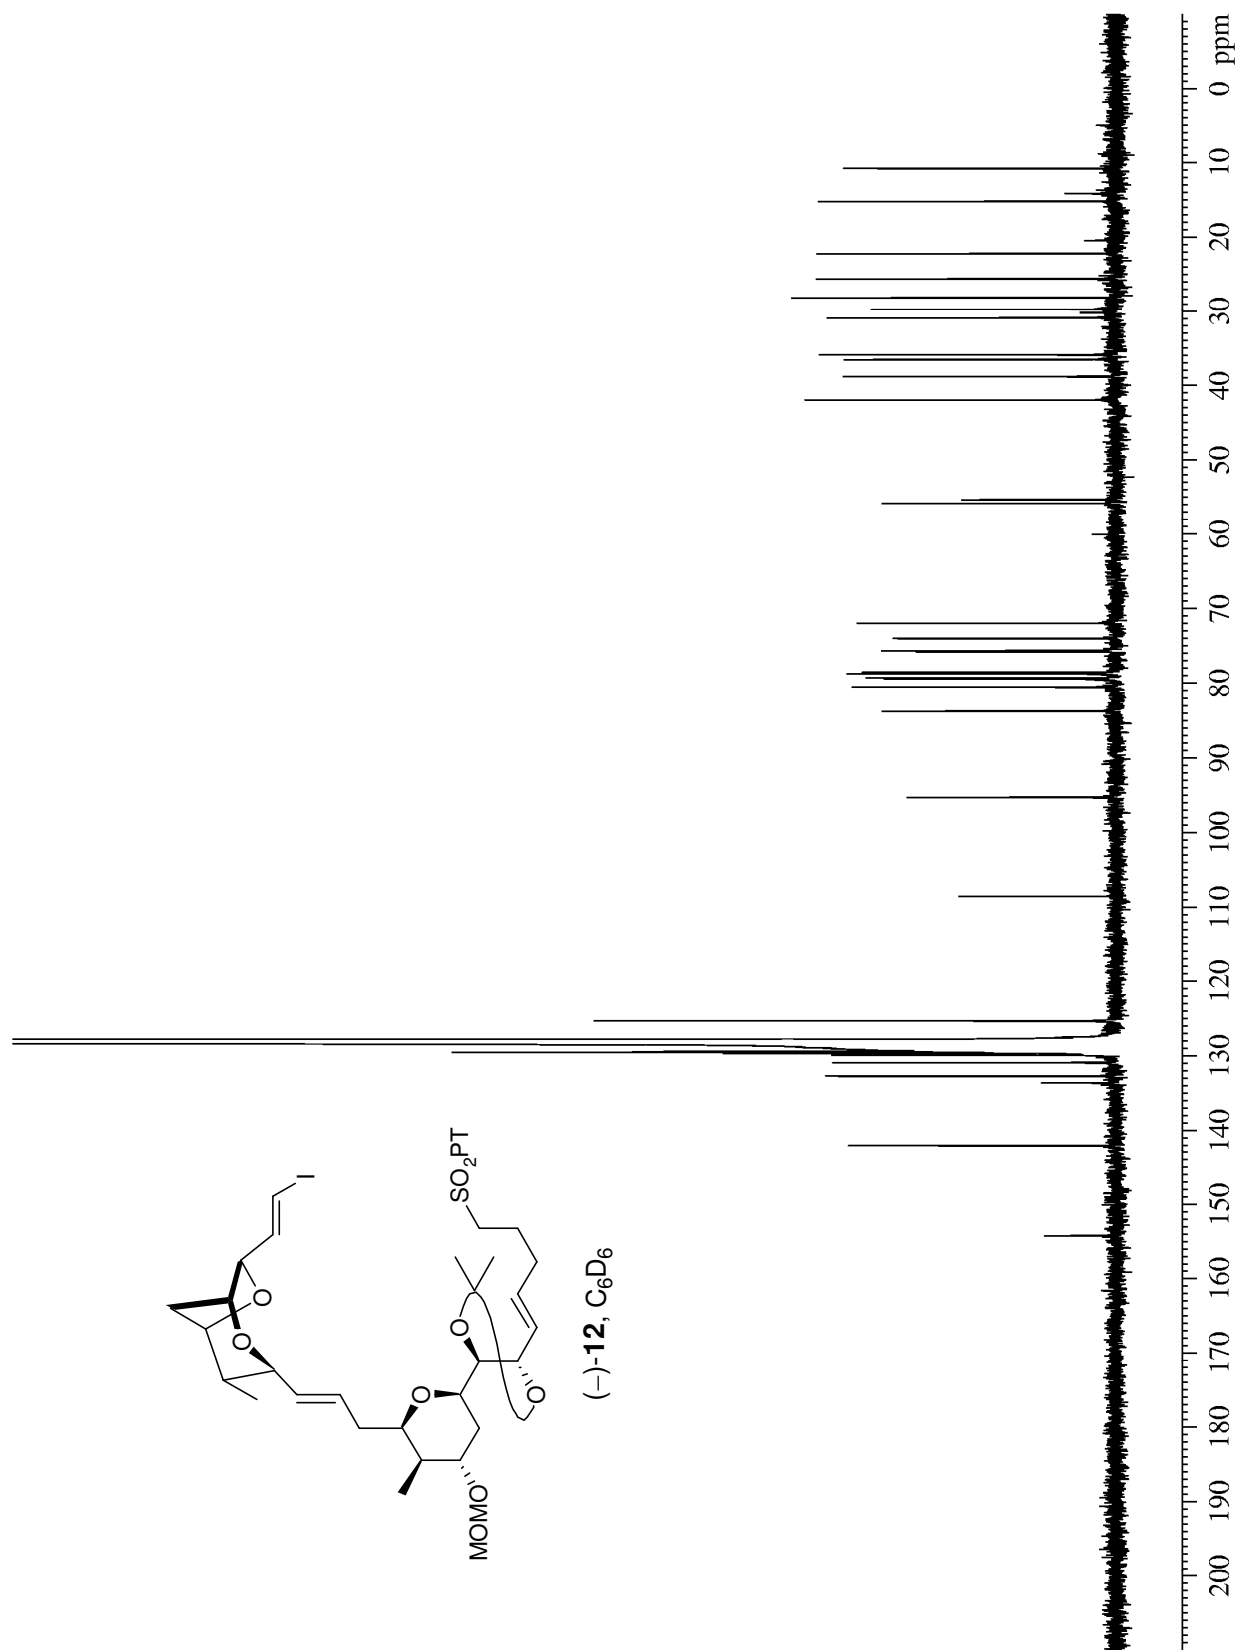

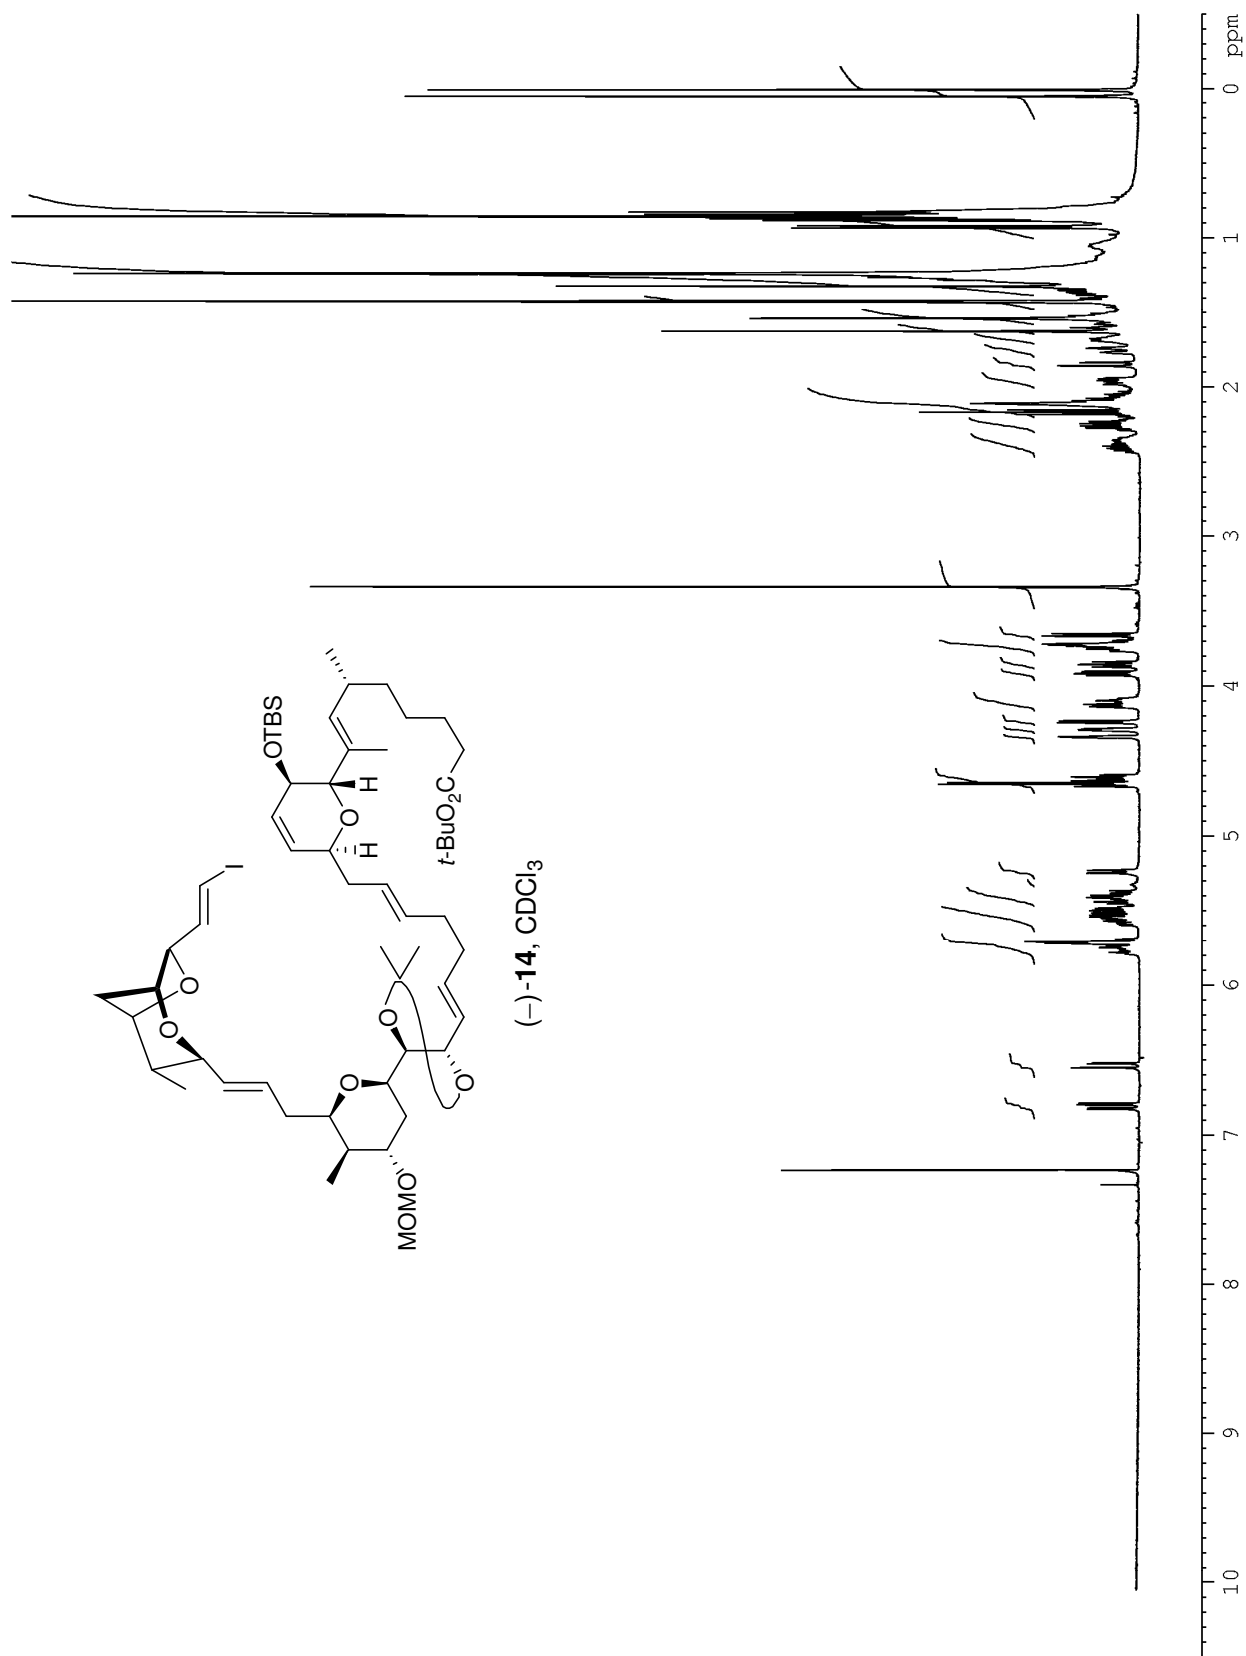

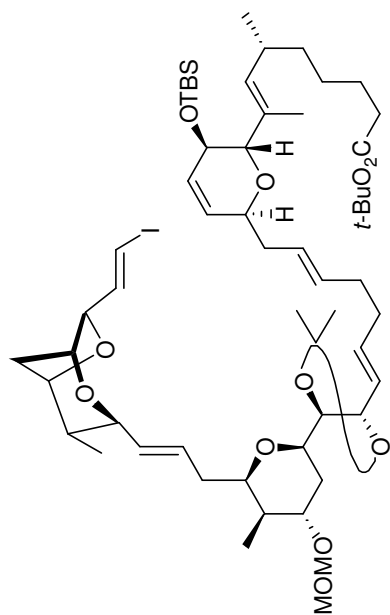

(-)-**14**, CDCl<sub>3</sub>

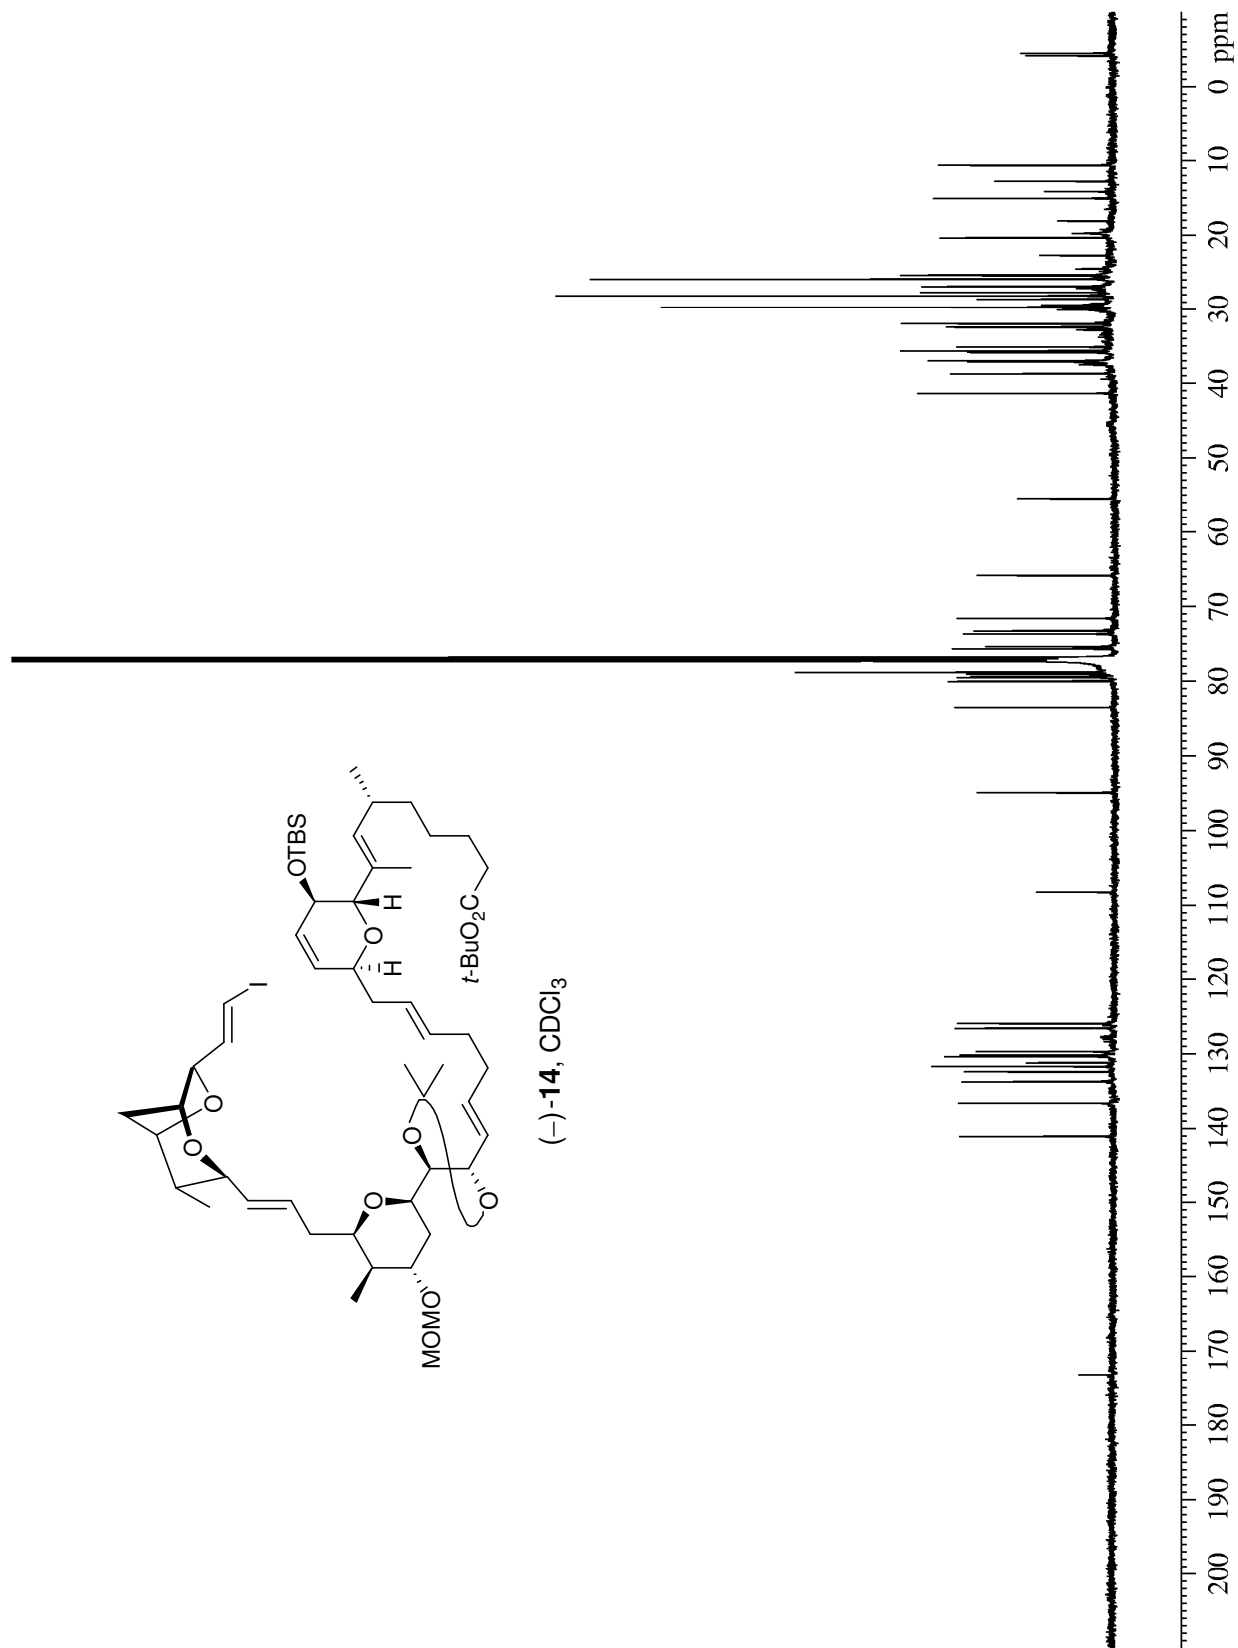

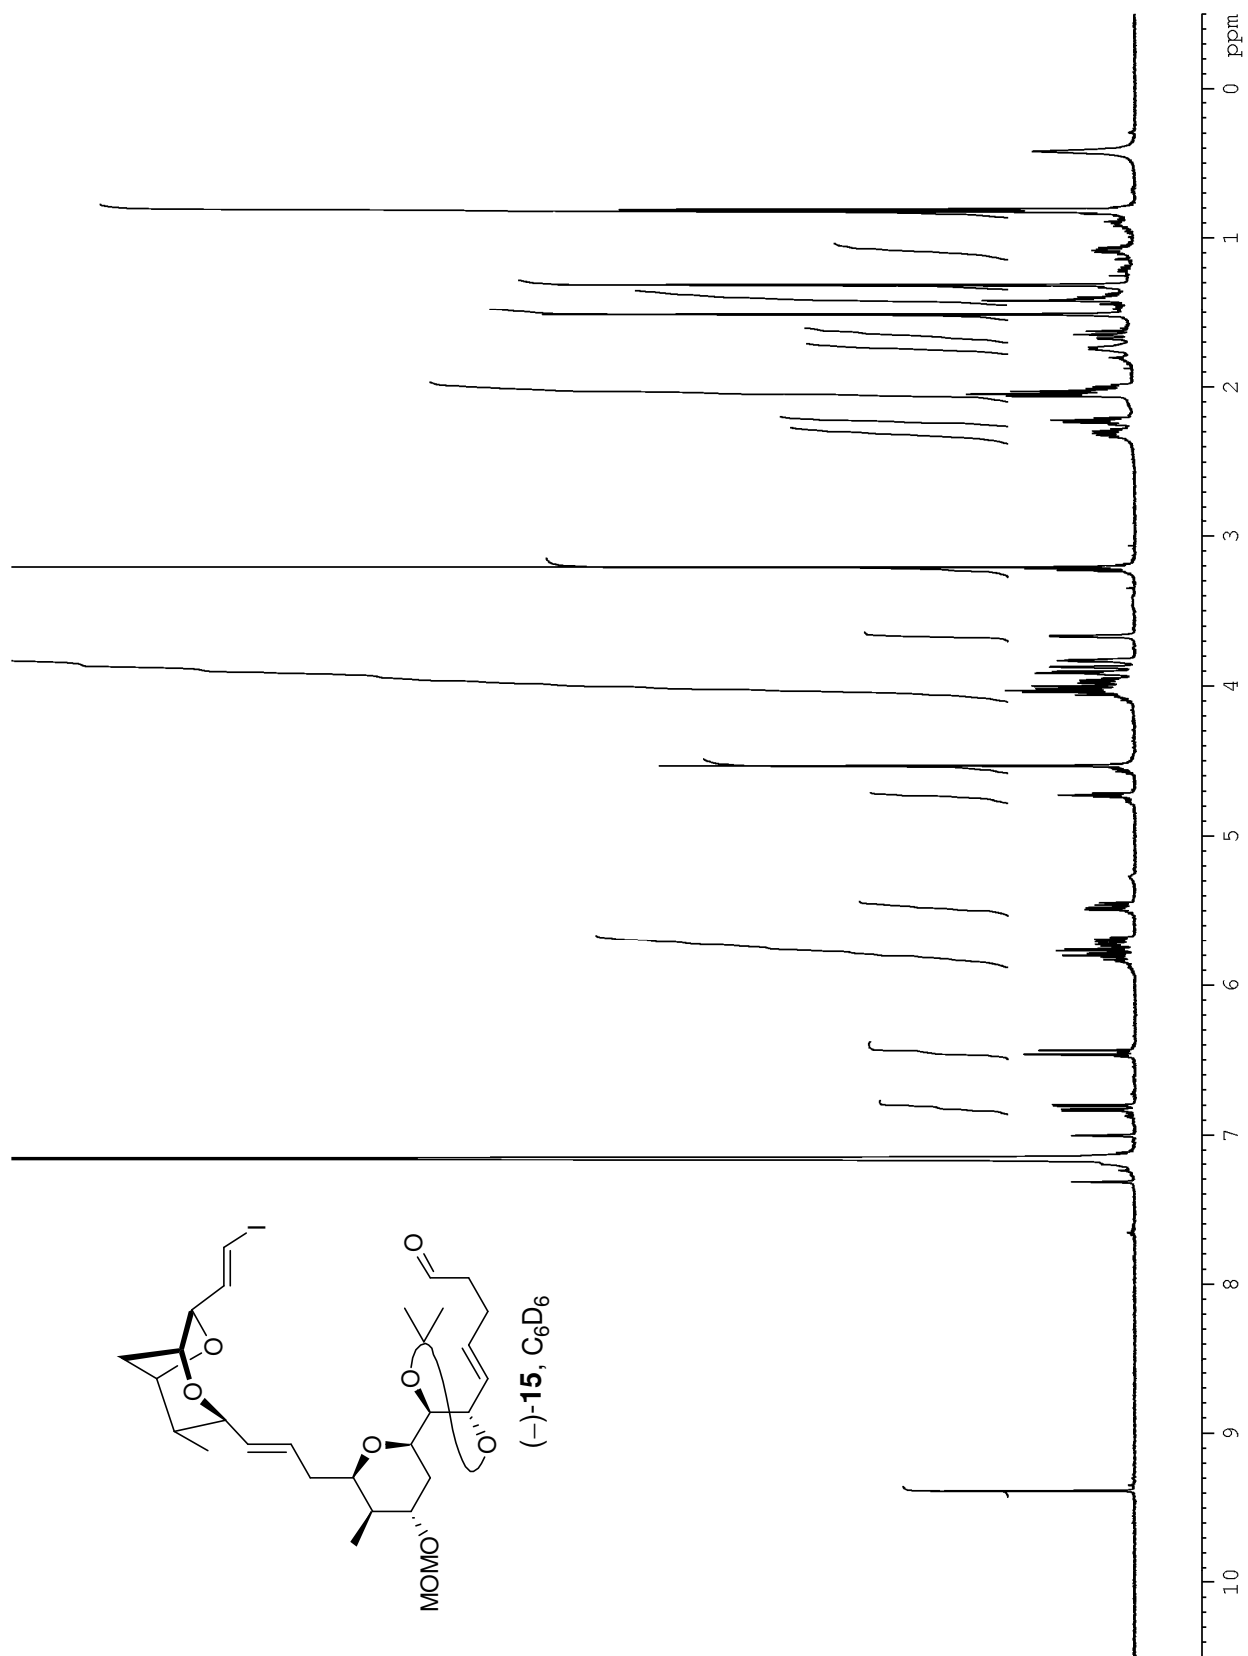

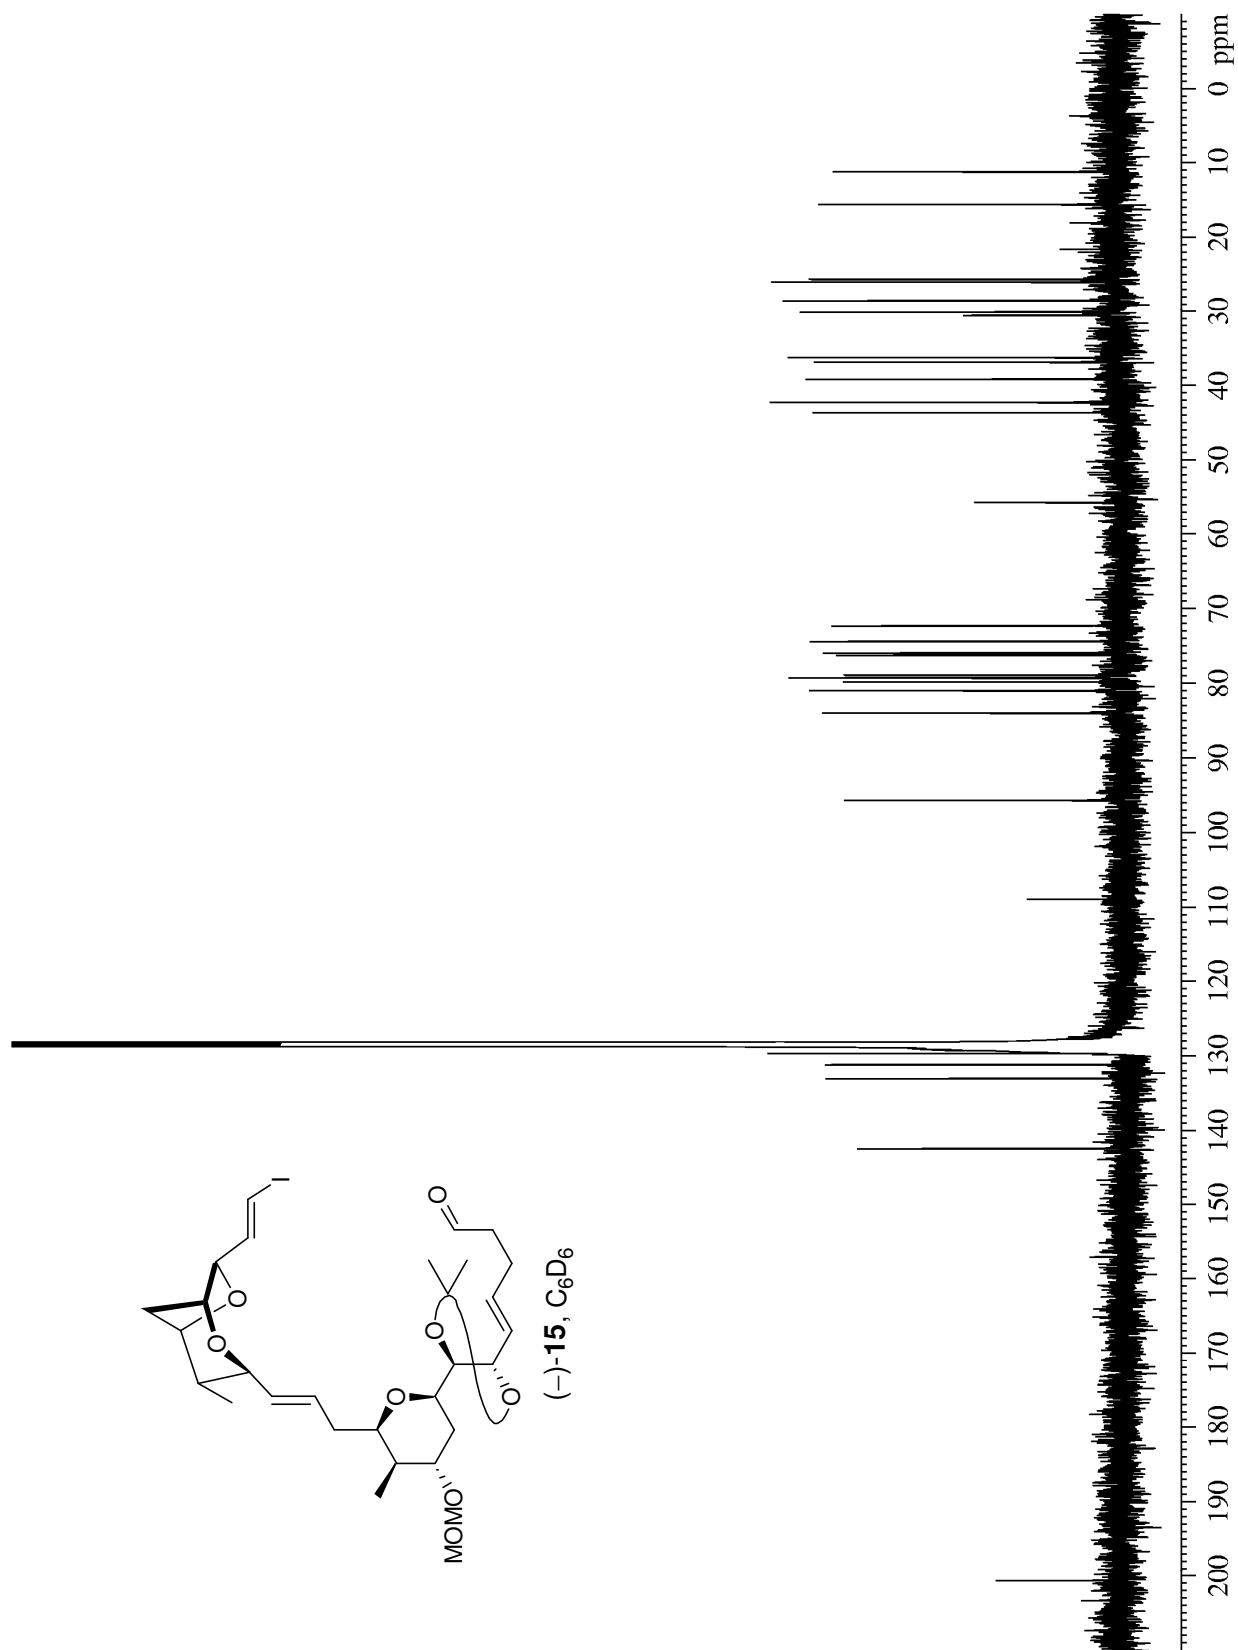

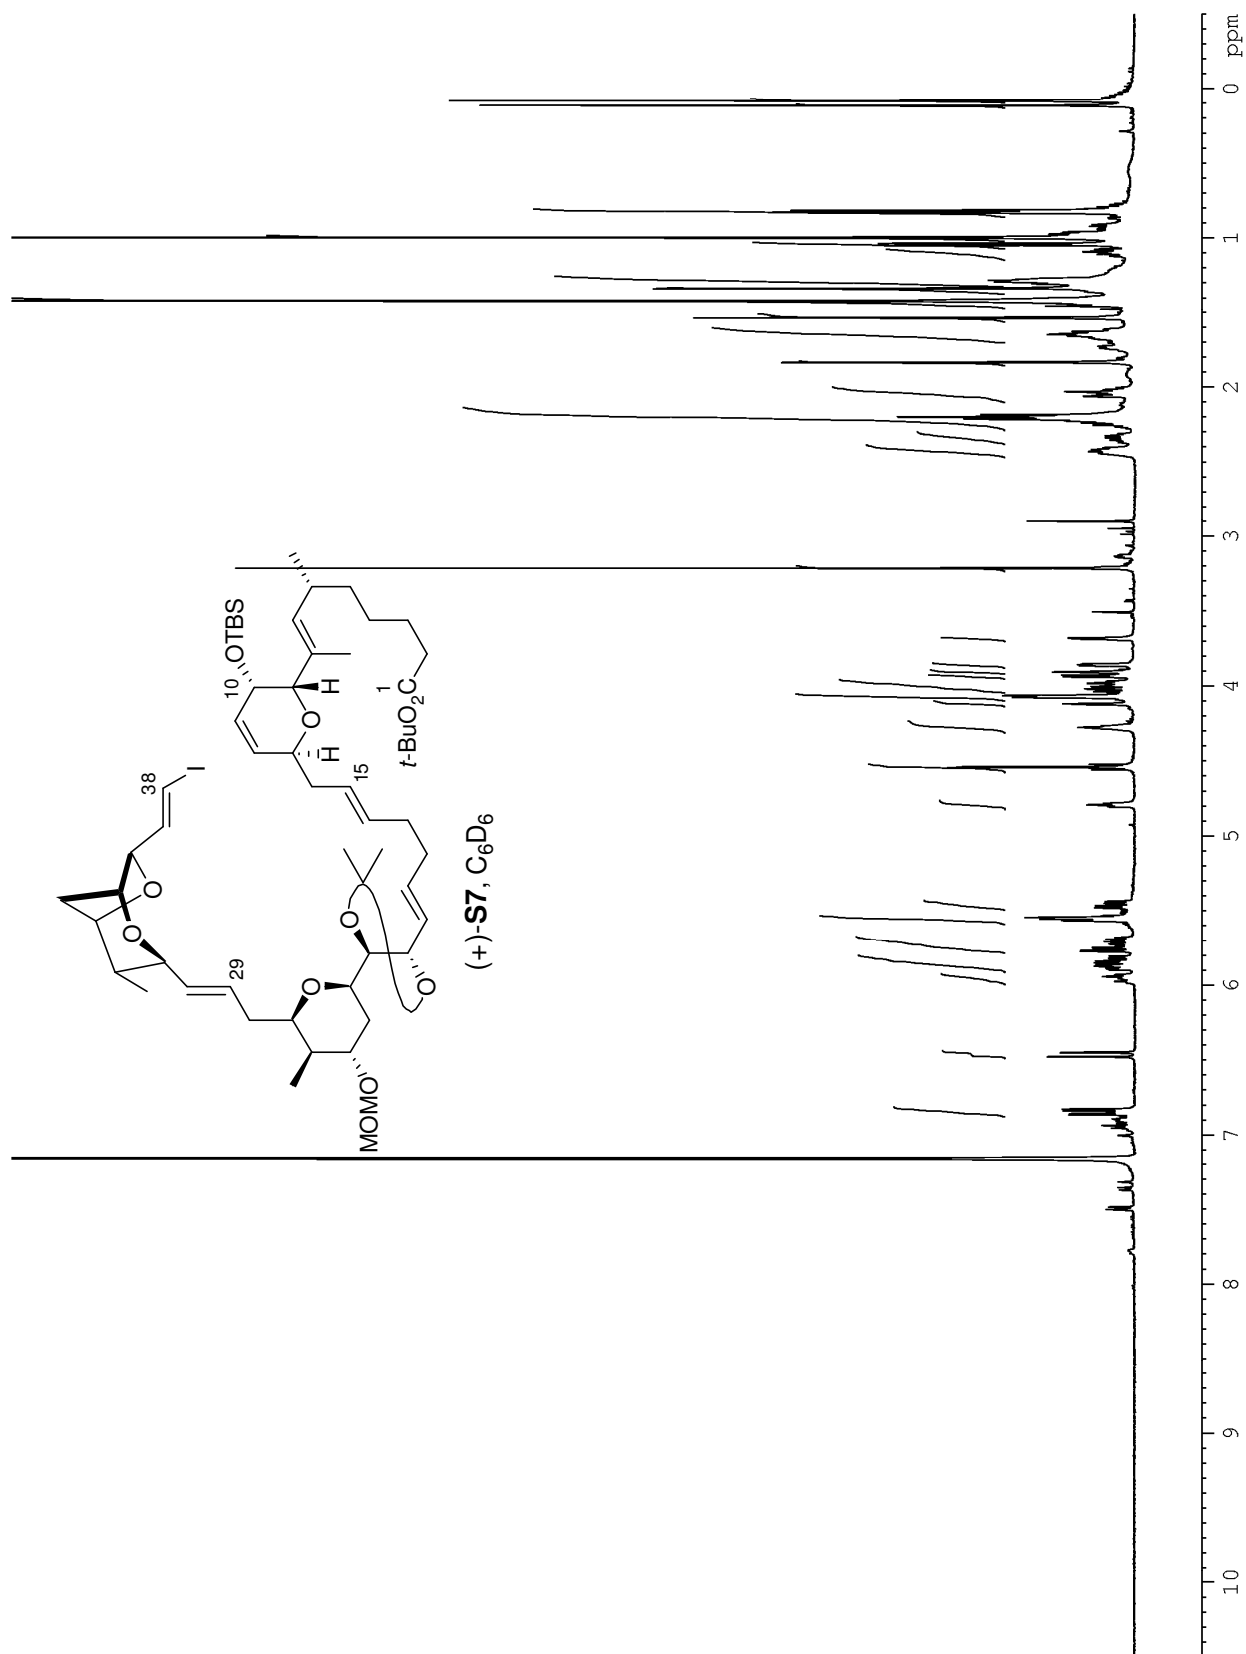

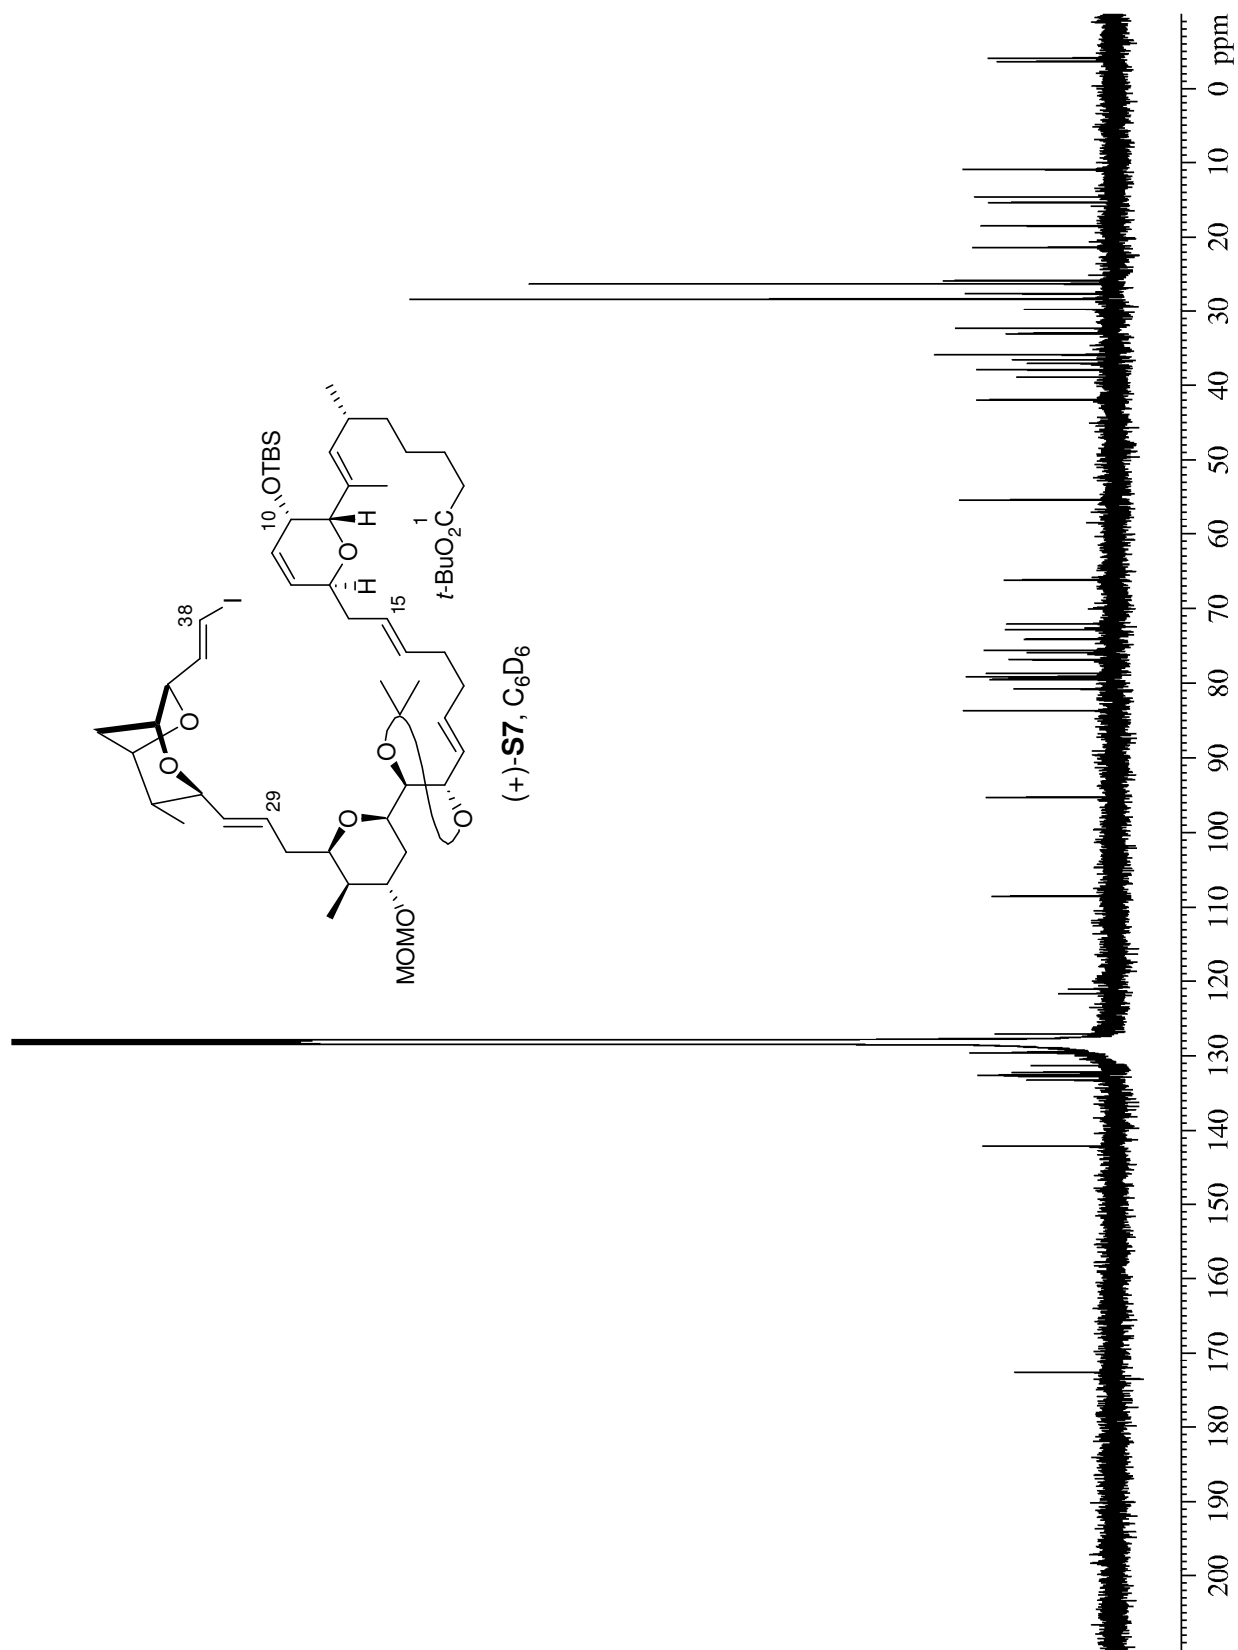

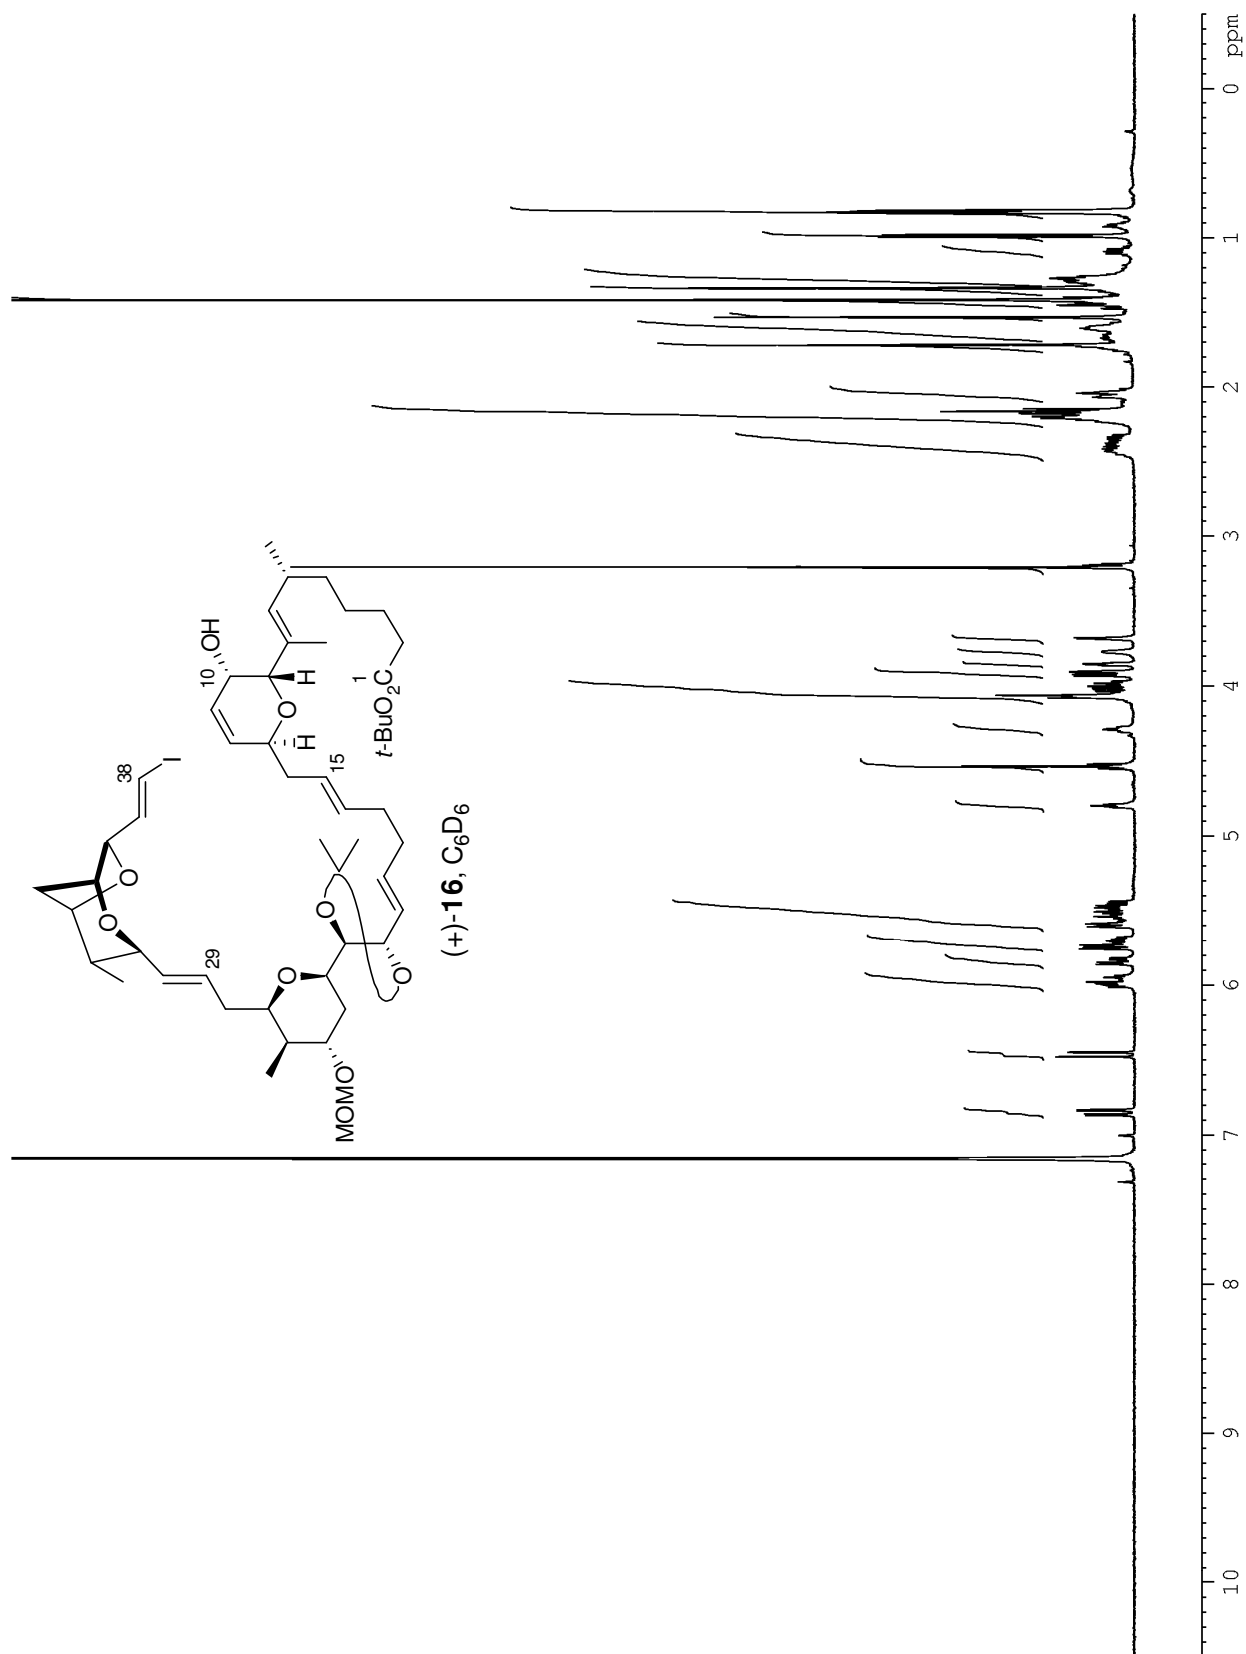

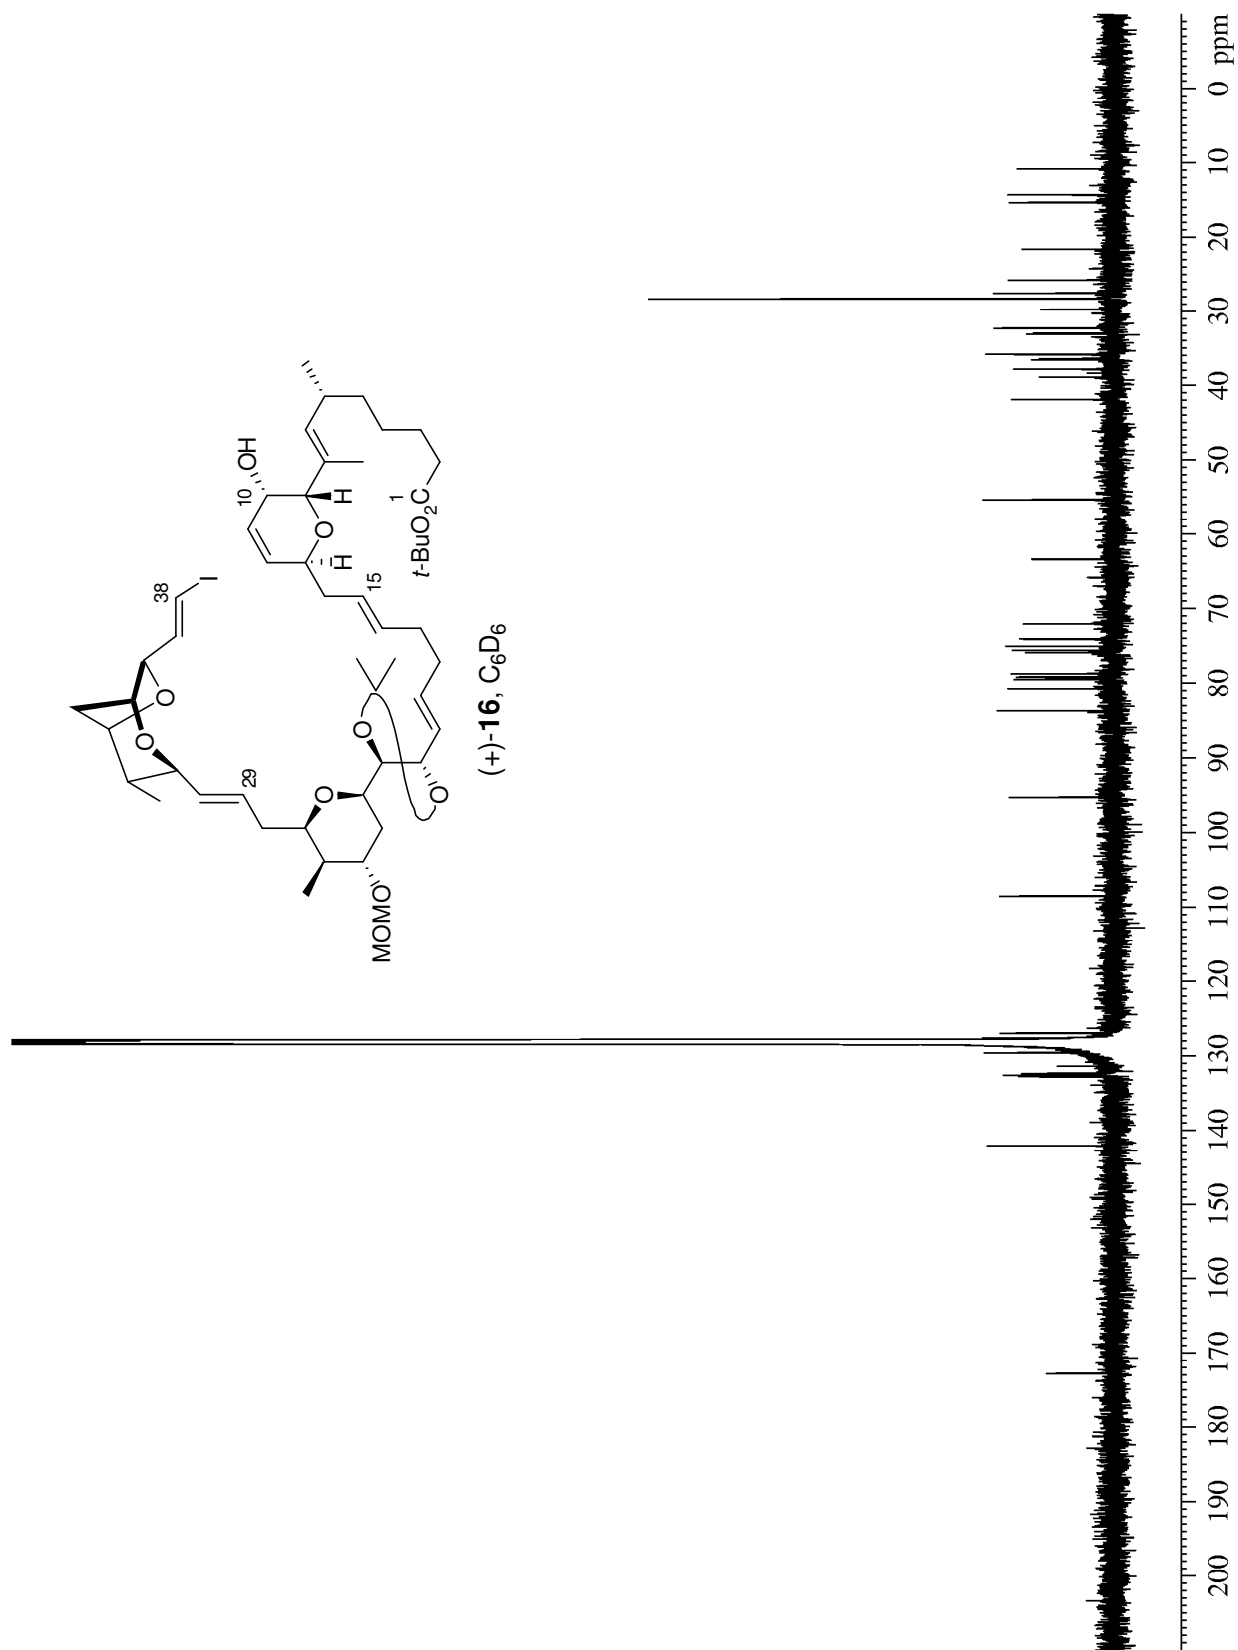

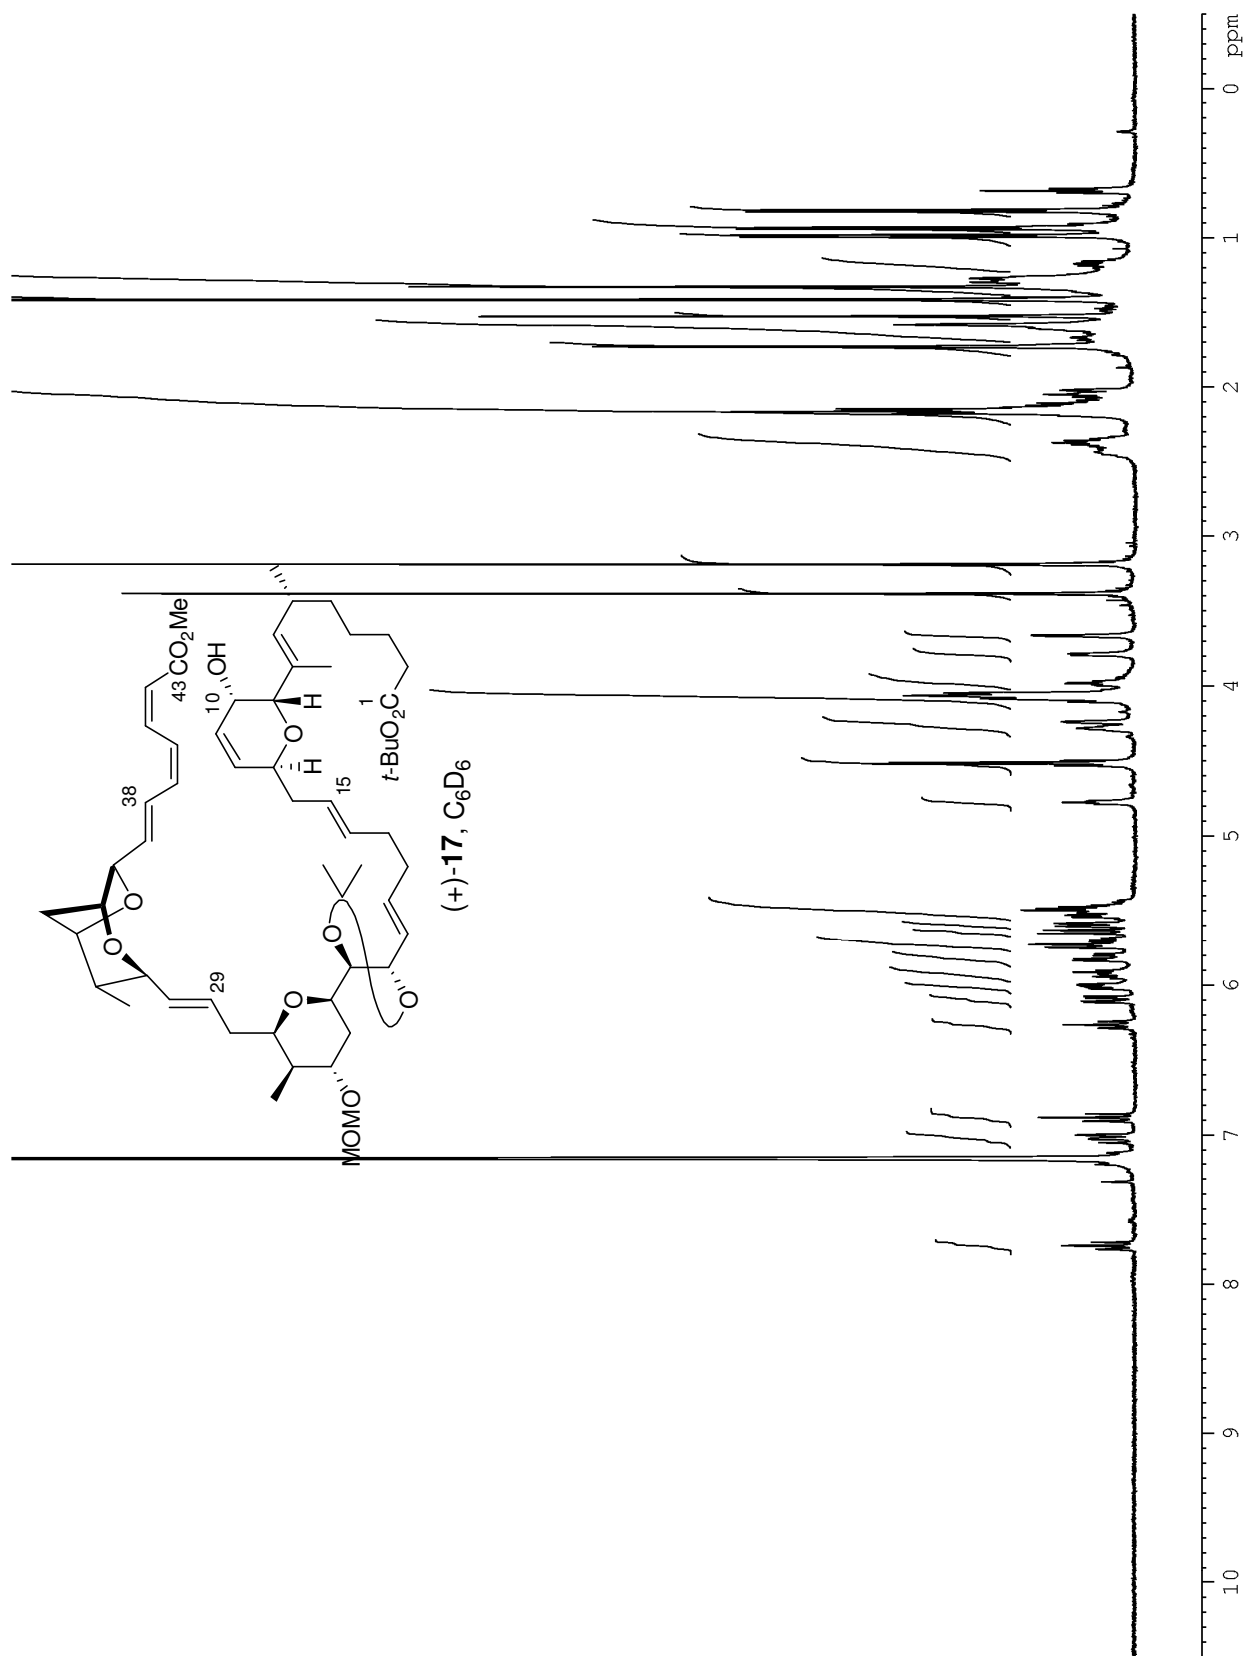

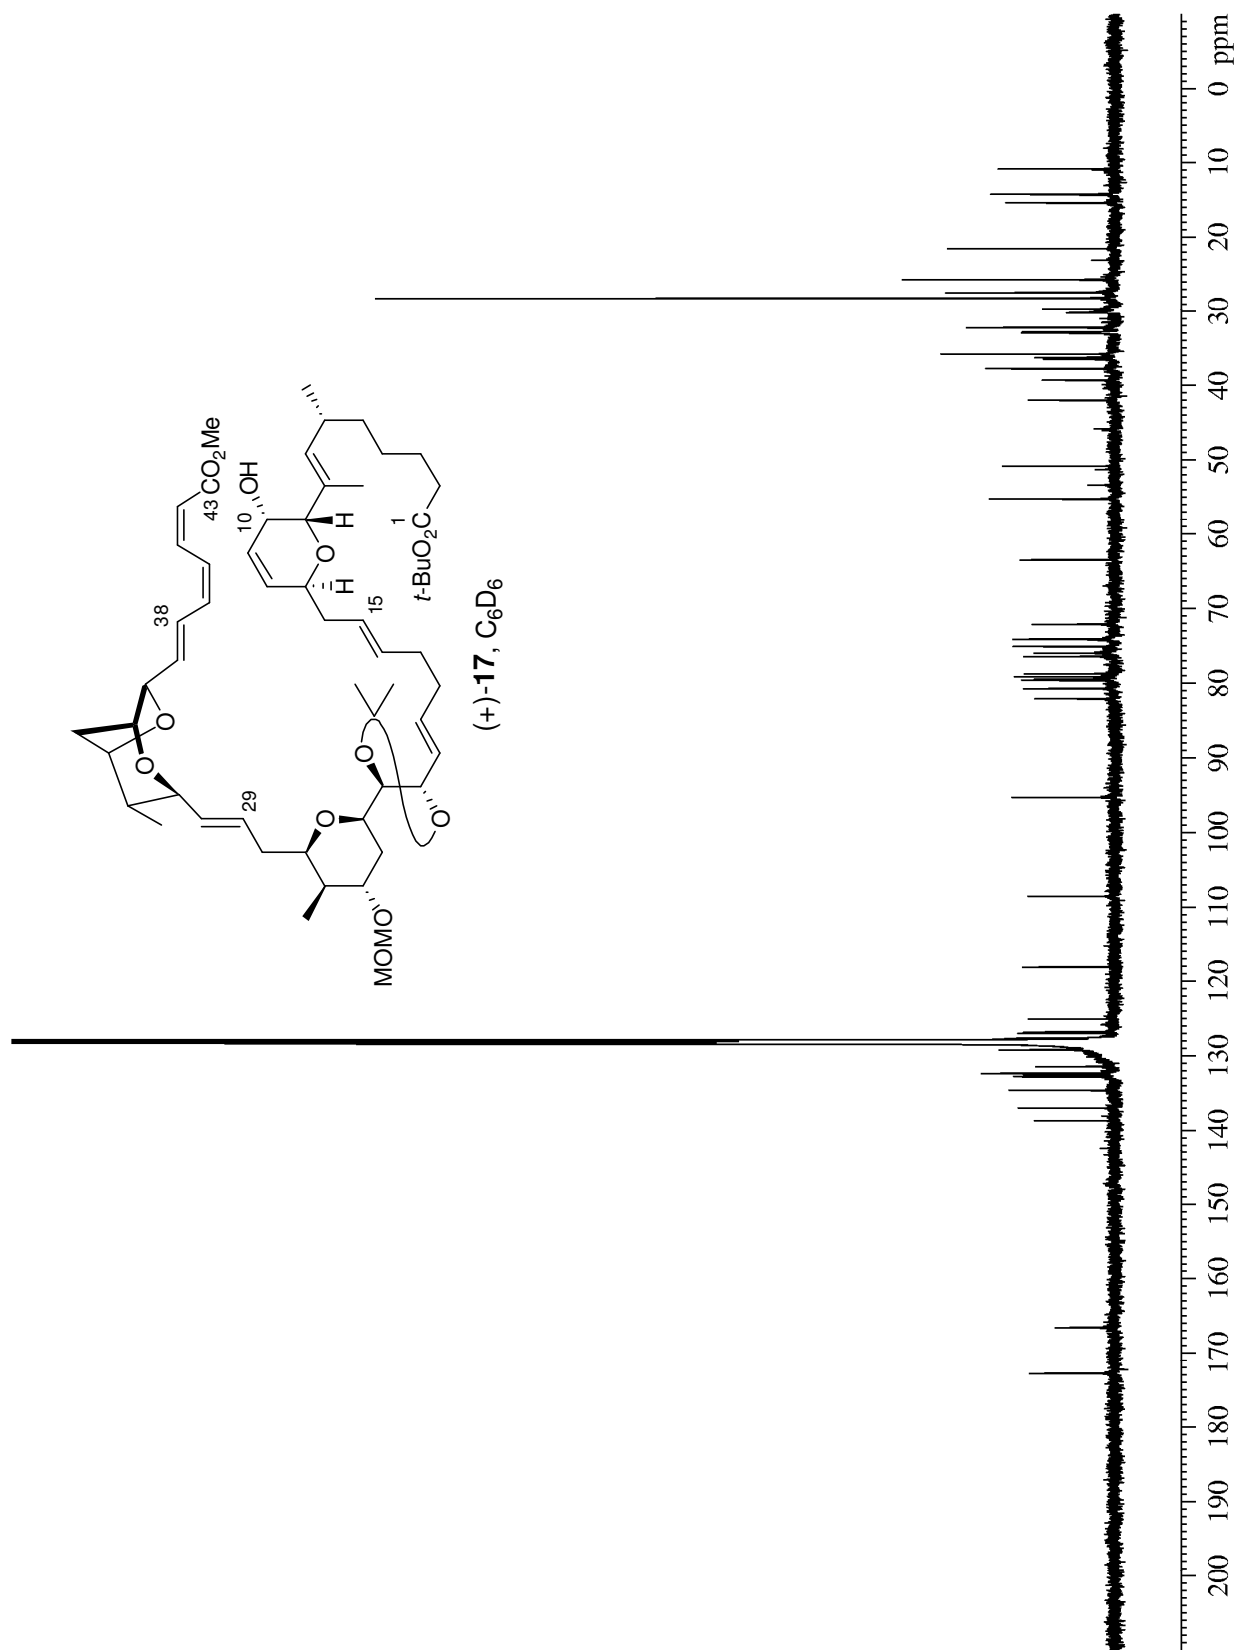

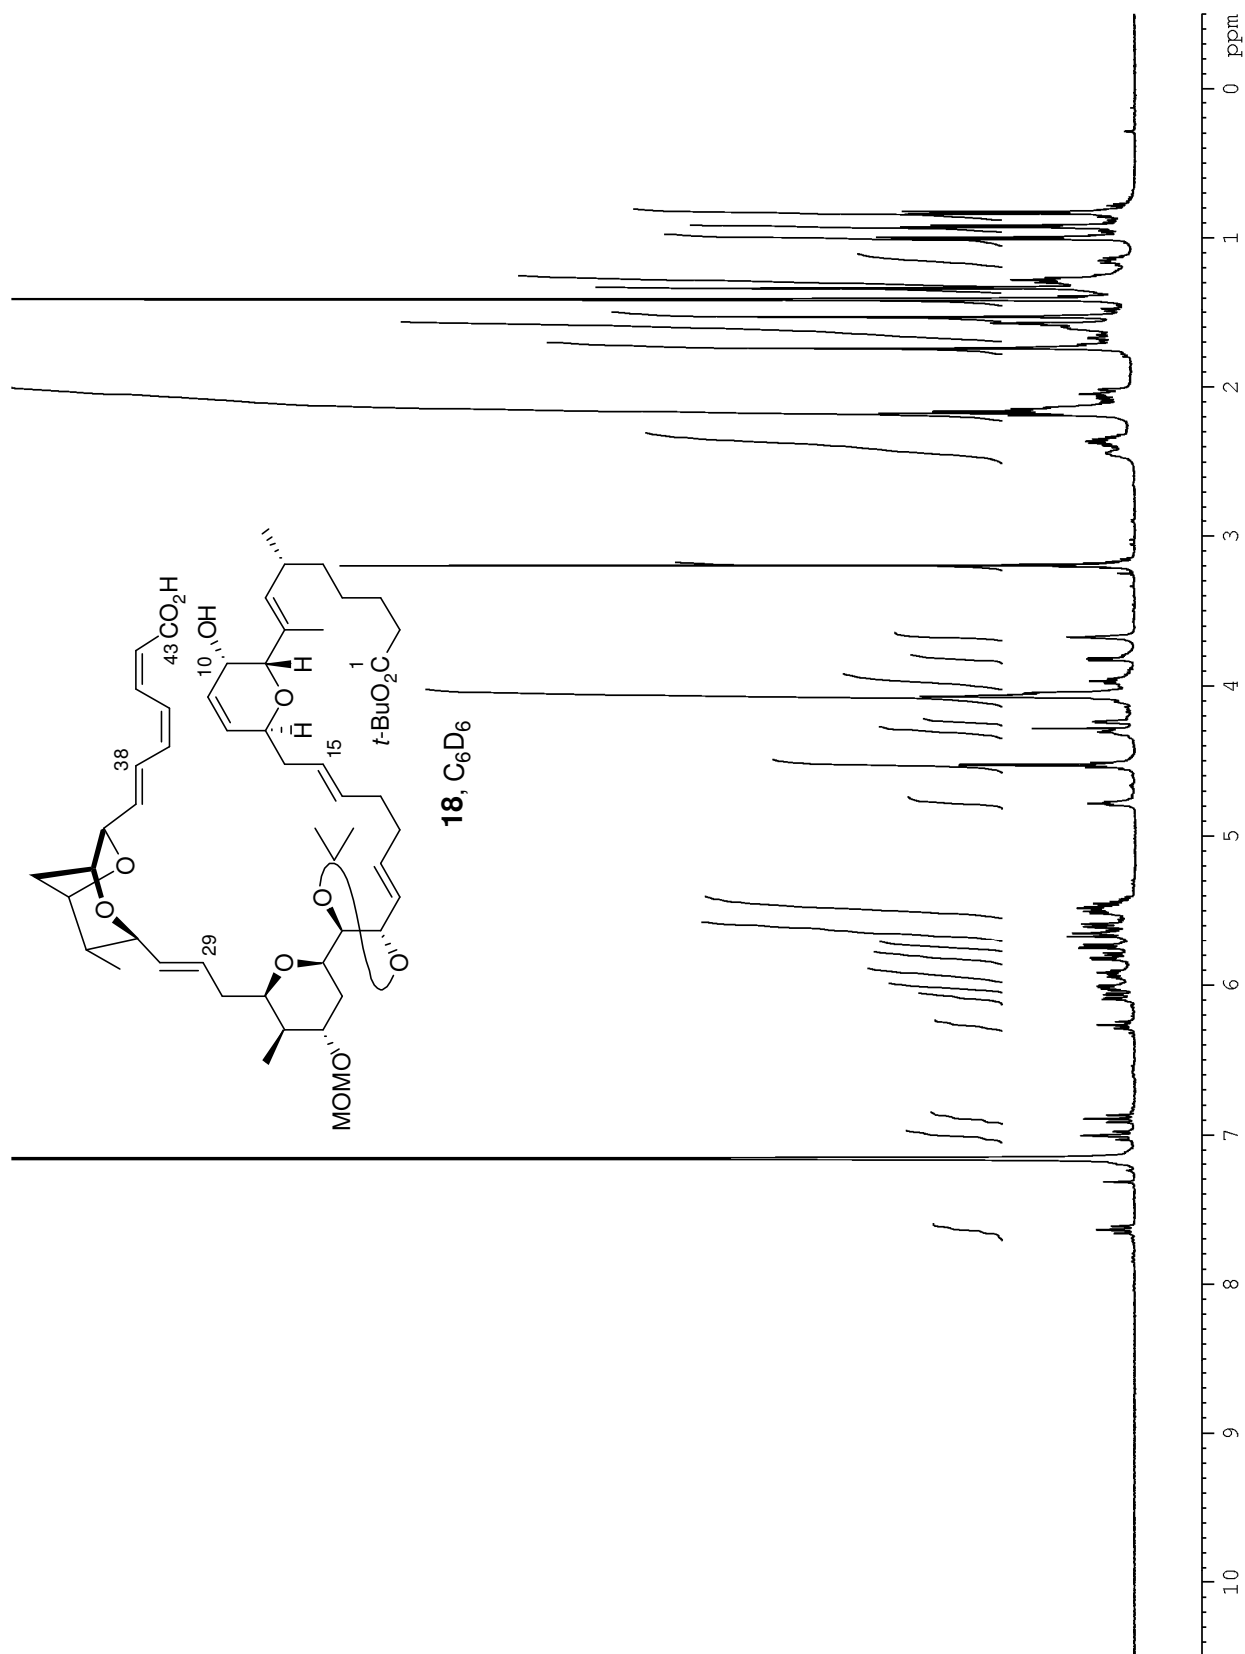

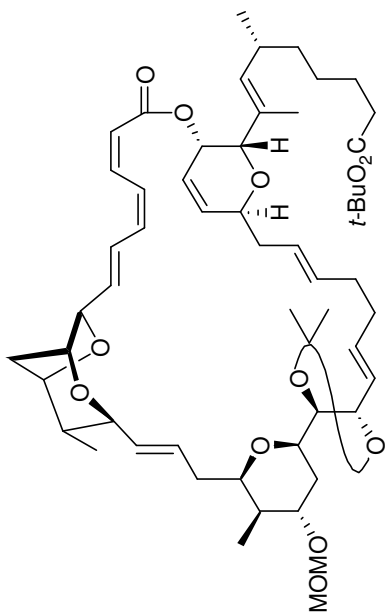

(+)-**19**,  $\text{CD}_3\text{OD}$

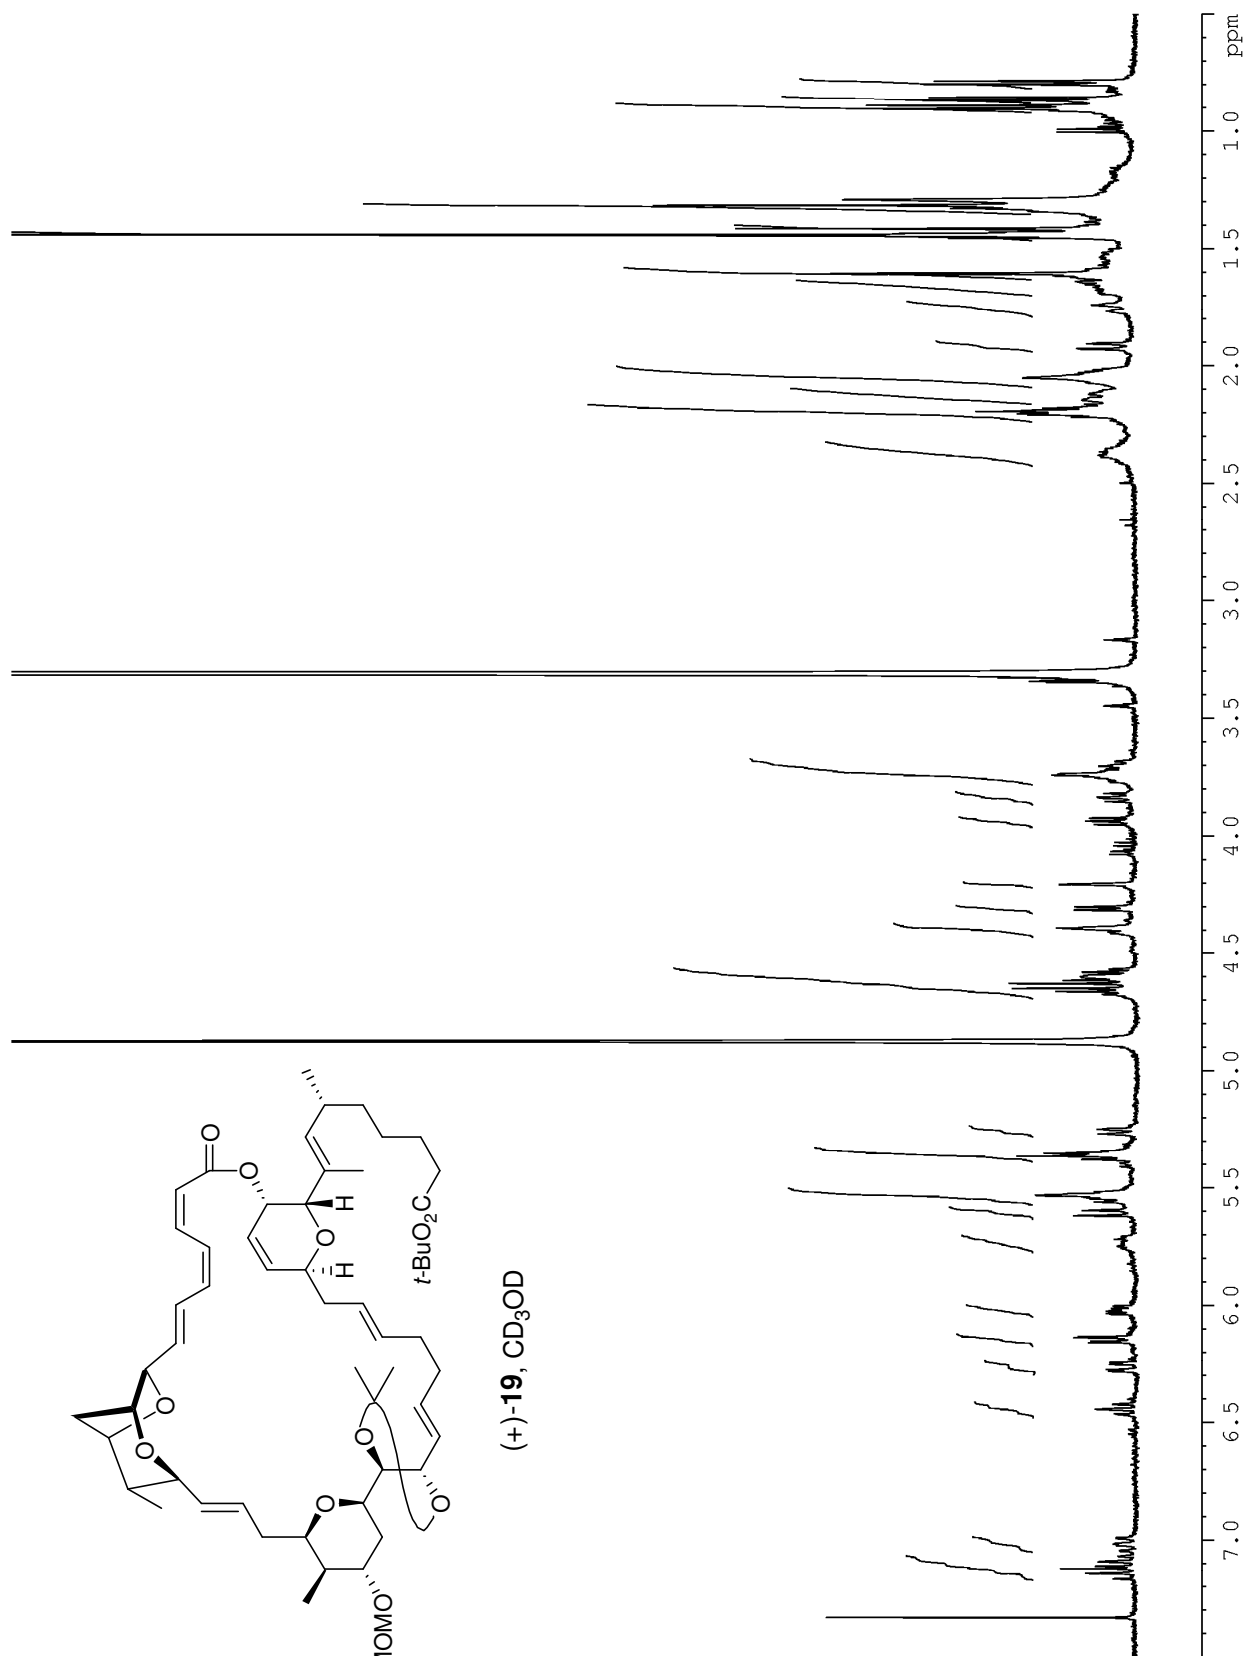

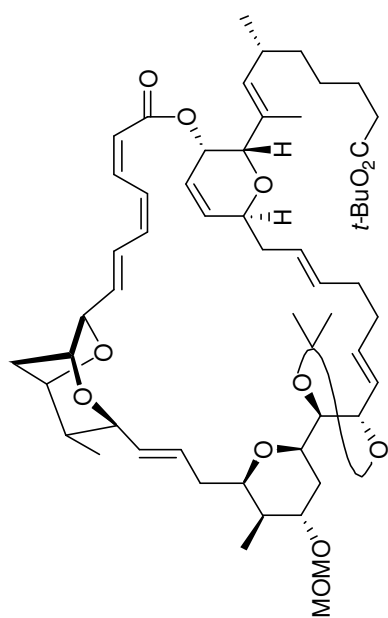

(+)-**19**, CD<sub>3</sub>OD

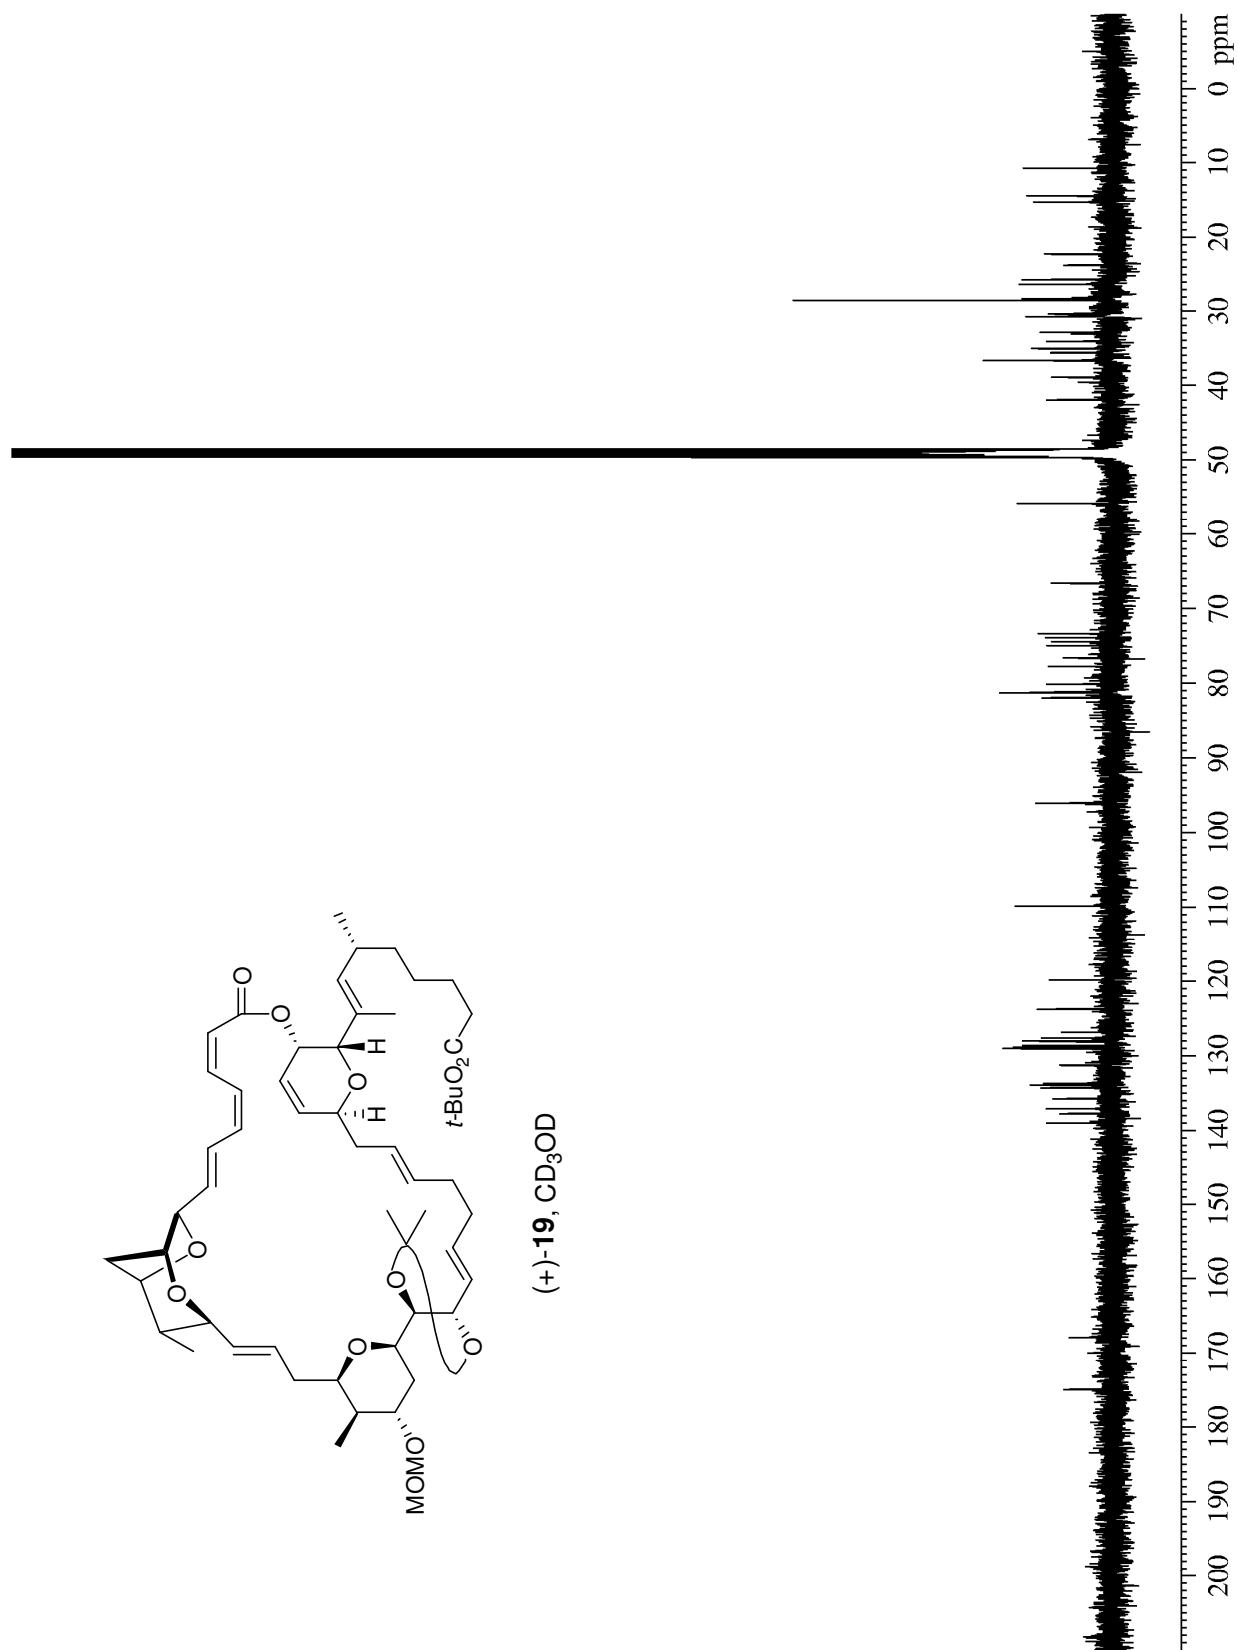

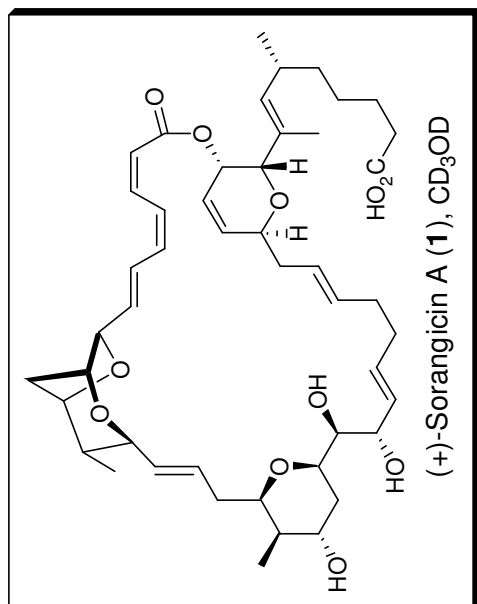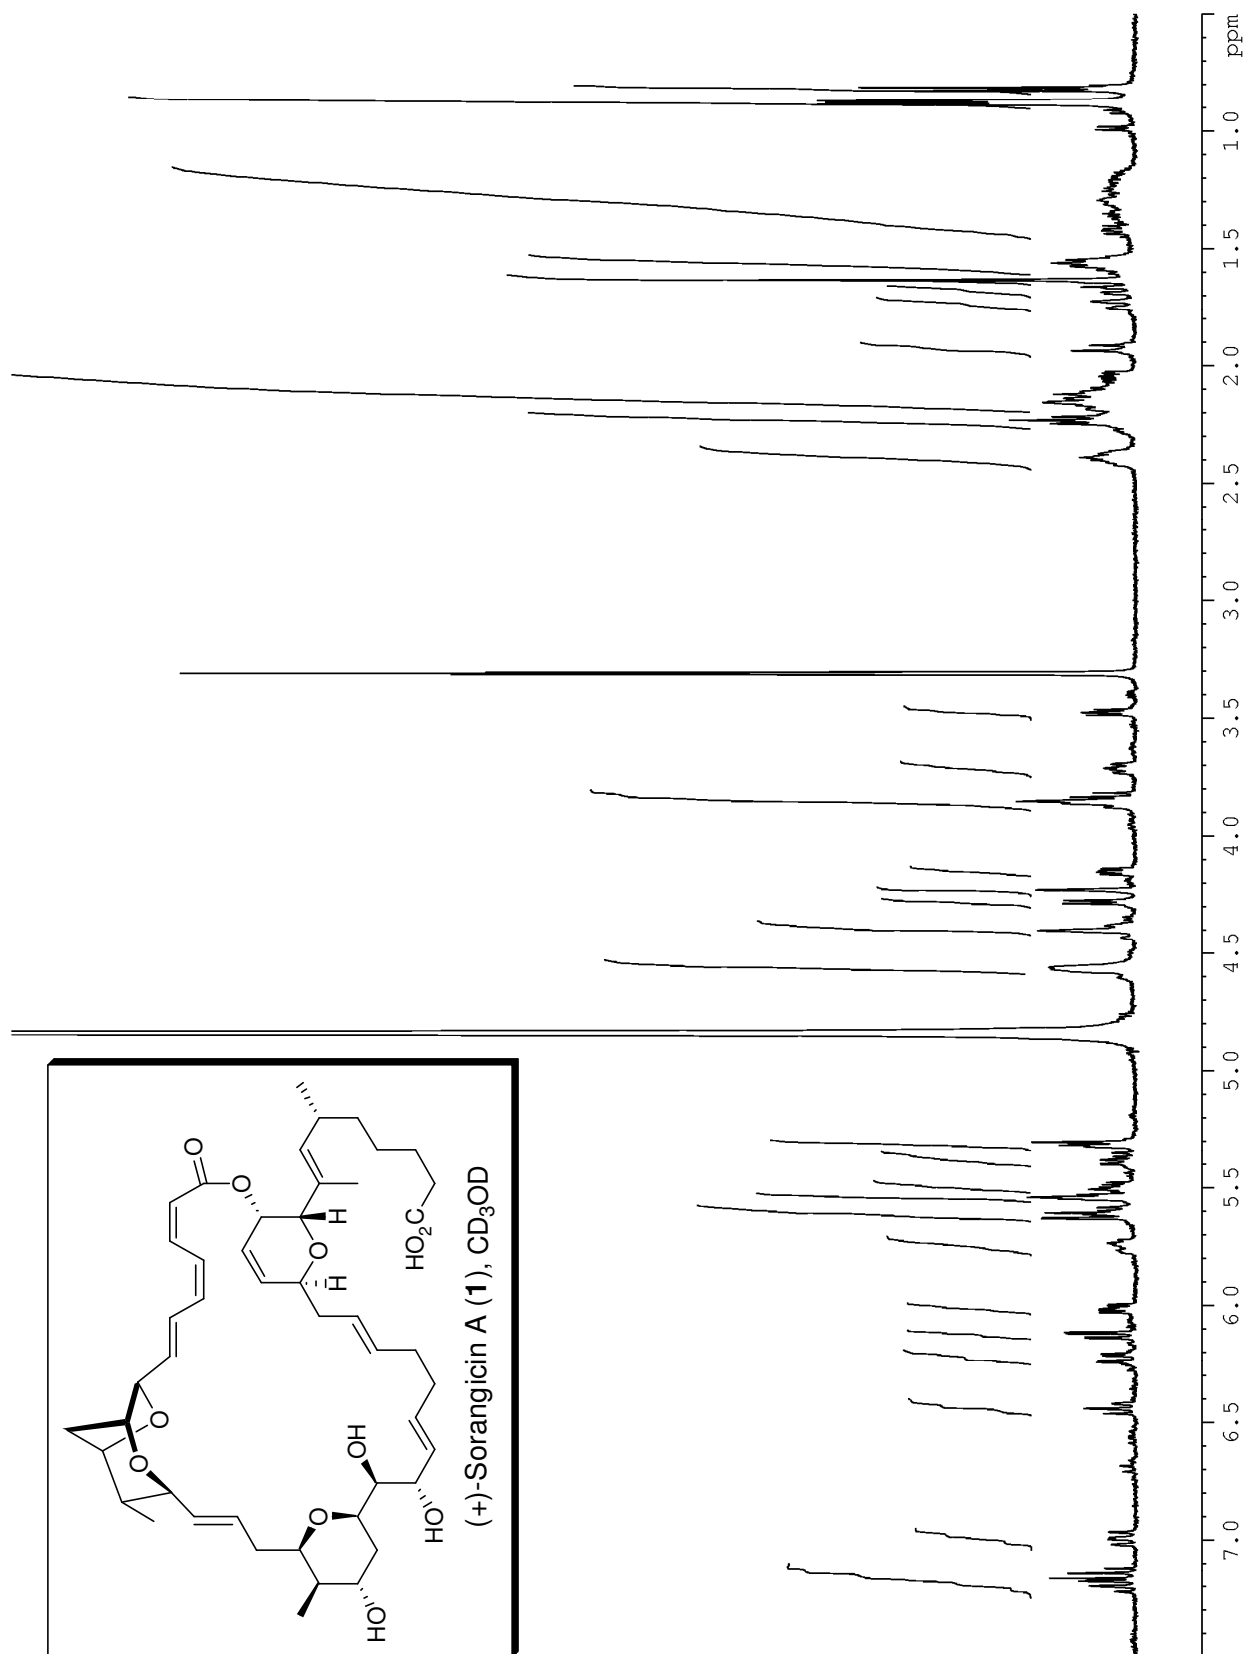

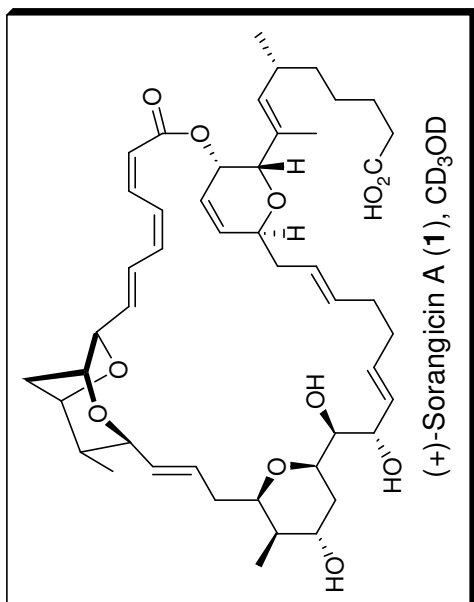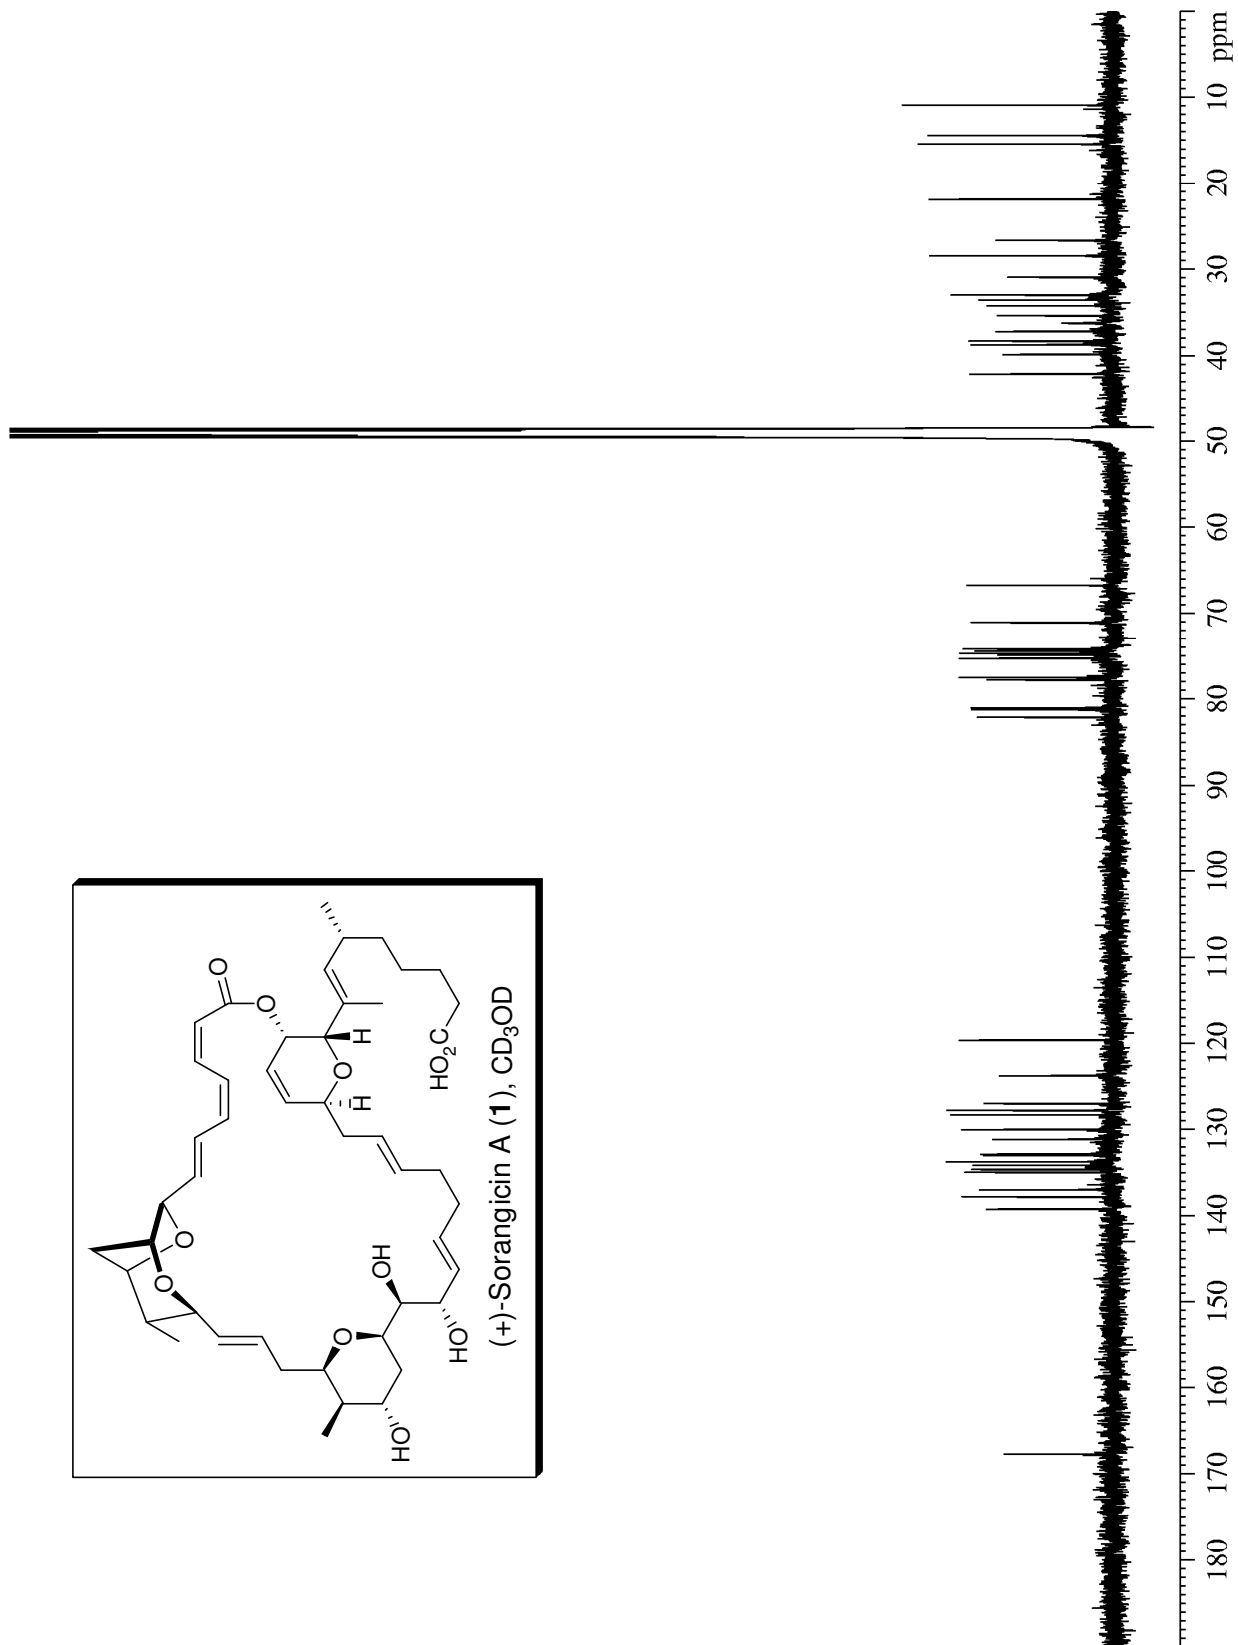

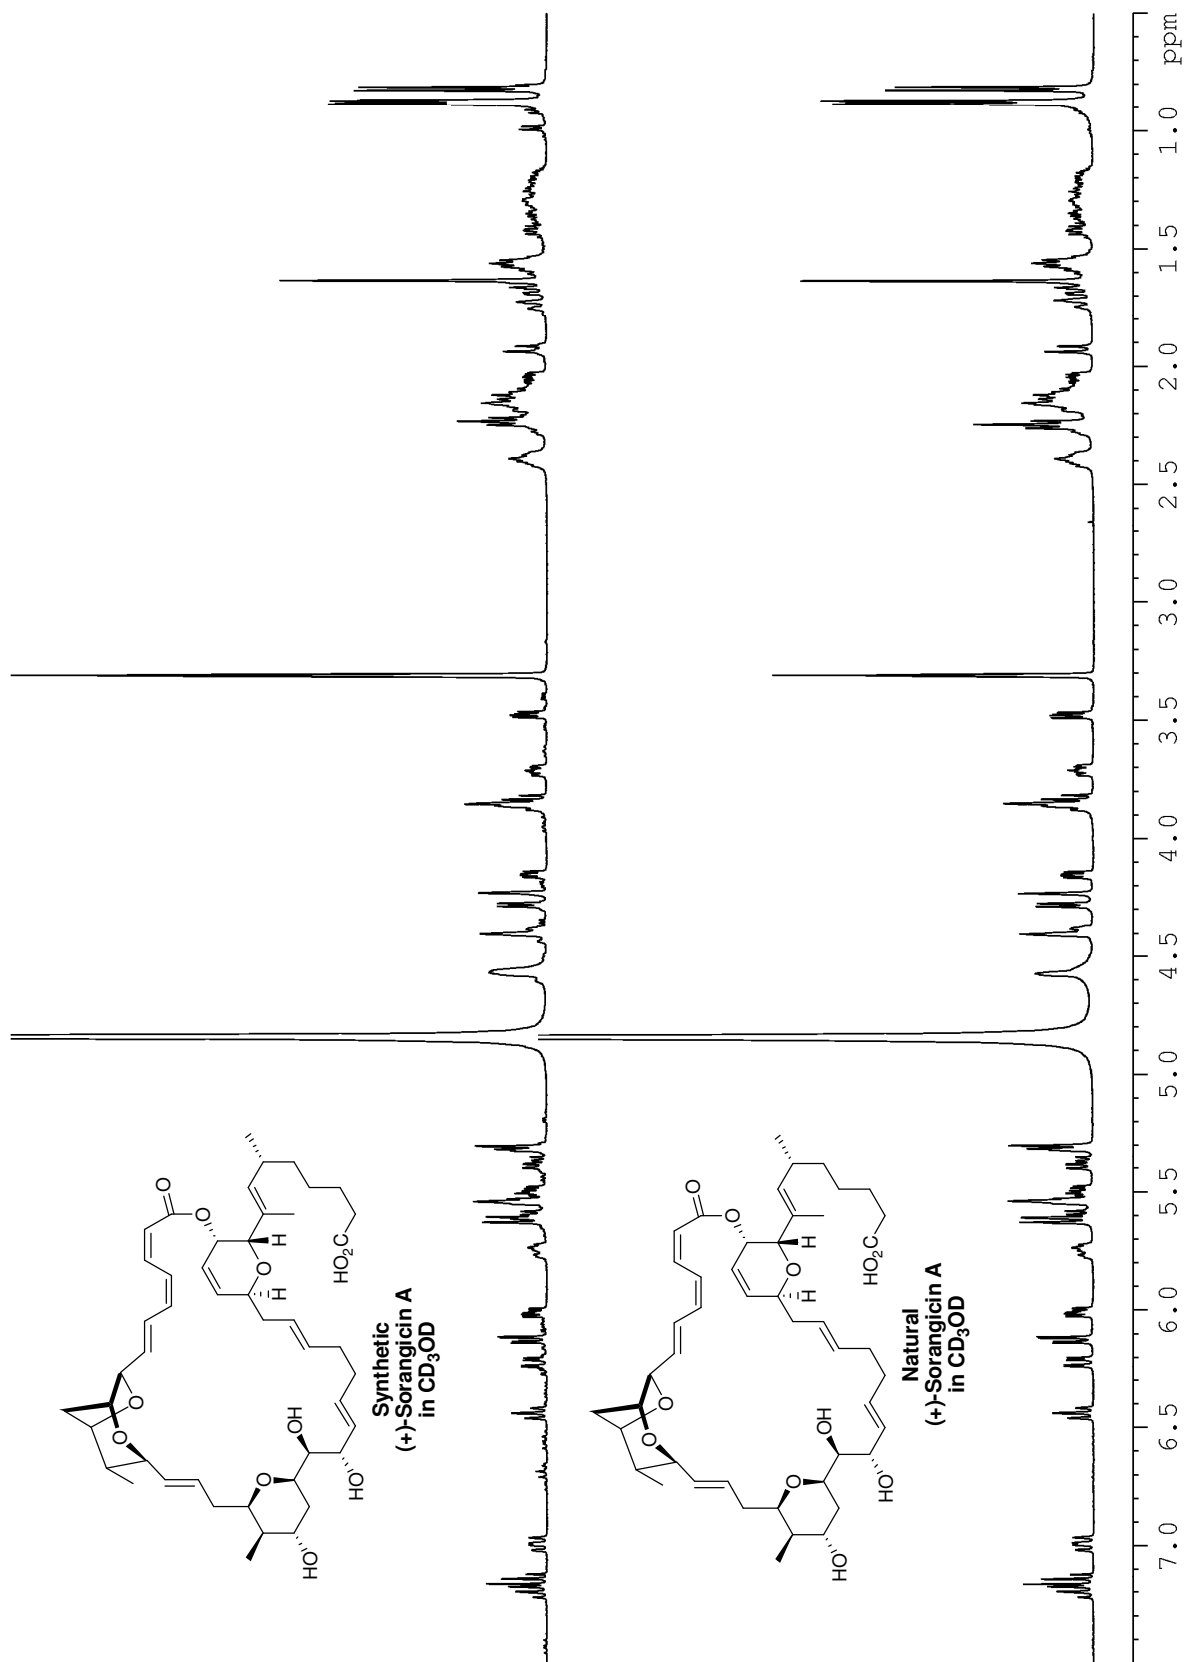

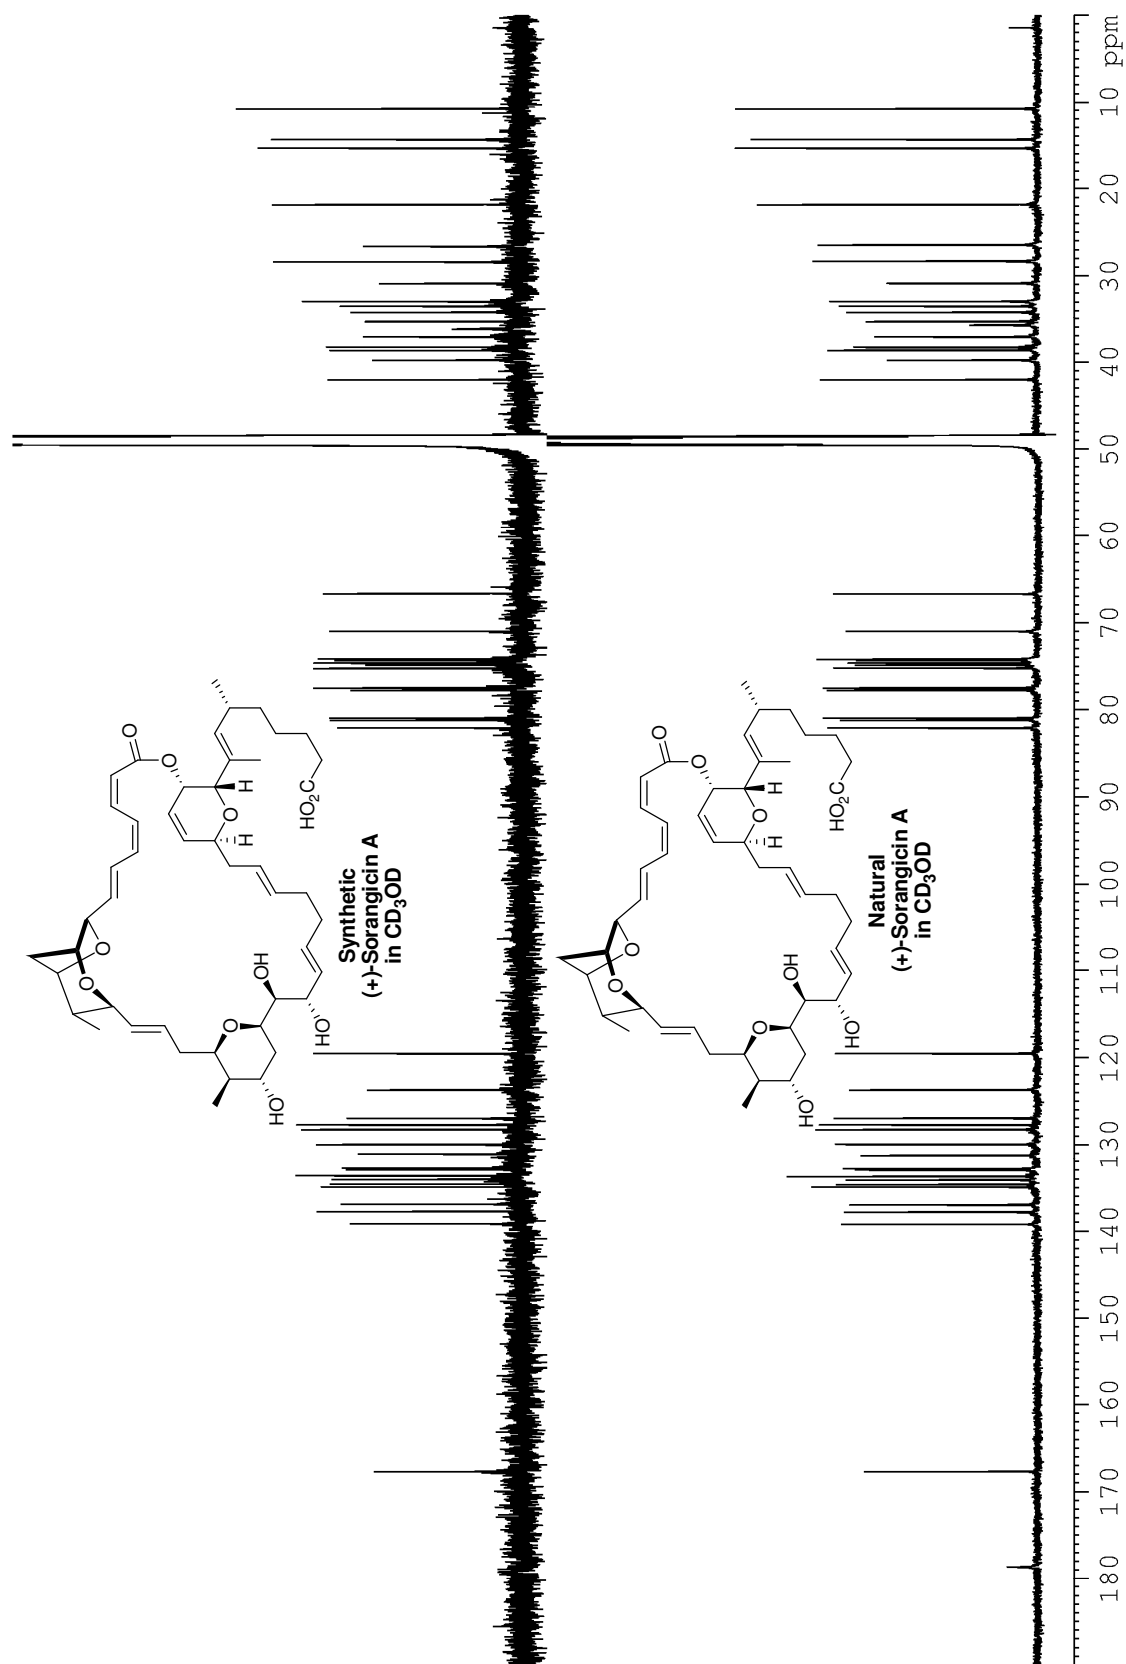

Supplement: NIHMS138110-supplement-1_si_001.pdf [file NIHMS138110-supplement-1_si_001.pdf]
